# Supplementary material for: Theoretical analysis of the OH-initiated atmospheric oxidation reactions of imidazole
Source: Royal Society of Chemistry journal article supplement (doi:10.1039/d4cp02103g), 2024-01-01
Supplement: d4cp02103g1.pdf [file d4cp02103g1.pdf]

# *Supporting information for* Theoretical Analysis of the OH-Initiated Atmospheric Oxidation Reactions of Imidazole

Thomas Golin Almeida<sup>1</sup>, Carles Martí<sup>2</sup>, Theo Kurtén<sup>1</sup>,  
Judit Zádor<sup>2</sup>, Sommer L. Johansen<sup>2</sup>

<sup>1</sup>Department of Chemistry, University of Helsinki, Helsinki 00014, Finland

<sup>2</sup>Combustion Research Facility, Sandia National Laboratories, Livermore 94550, California, United States

## Contents

|     |                                                                                        |     |
|-----|----------------------------------------------------------------------------------------|-----|
| S1  | RRKM-ME uncertainty analysis . . . . .                                                 | S2  |
| S2  | M12a cyclization and 1,5 H-shift . . . . .                                             | S3  |
| S3  | Endocyclization pathways . . . . .                                                     | S3  |
| S4  | Numerical values for product yields and standard deviations . . . . .                  | S4  |
|     | S4.1 First-generation RO <sub>2</sub> . . . . .                                        | S4  |
|     | S4.2 Alkoxy radical products . . . . .                                                 | S6  |
|     | S4.3 Second-generation RO <sub>2</sub> . . . . .                                       | S8  |
| S5  | Barriers and rate coefficients for second-generation RO <sub>2</sub> . . . . .         | S9  |
| S6  | Pressure dependence of product yields . . . . .                                        | S10 |
| S7  | Time evolution profiles for first-generation RO <sub>2</sub> . . . . .                 | S11 |
| S8  | Vertical excitation energies for first-generation RO <sub>2</sub> . . . . .            | S12 |
| S9  | Multiconfigurational character diagnostics . . . . .                                   | S12 |
| S10 | ROCCSD(T)-F12a/cc-pVTZ-F12 and UCCSD(T)-F12a/cc-pVDZ-F12 single-point energies . . .   | S14 |
| S11 | Electronic energies, zero-point vibrational energies and partition functions . . . . . | S15 |
| S12 | Cartesian coordinates, vibrational wavenumbers and rotational constants . . . . .      | S18 |

## S1 RRKM-ME uncertainty analysis

In order to assess the uncertainty of calculated product yields due to the uncertainty in RRKM-ME model parameters and the calculated PES, we employed the automated procedure present in KinBot<sup>1</sup>. Here the approach was adapted for the MESMER code<sup>2</sup>. Briefly, the procedure is as follows. The RRKM-ME calculation was repeated 100 times, applying to each new calculation a random variation in model parameters within a pre-defined uncertainty range. Zero-point corrected energies were varied by applying an additive uniformly distributed shift in the  $\pm 0.25$  and  $\pm 0.5$  ranges for wells and transition states, respectively. For other values, a multiplicative random factor  $f$  was picked from a log-normally distributed uncertainty range  $1/a \leq f \leq a$ . For vibrational wavenumbers, Lennard-Jones  $\epsilon/k_B$  and  $\sigma$  parameters, we selected a variation range of  $1/1.2 \leq f \leq 1.2$ , while for the transition states' imaginary wavenumbers the range was  $1/1.1 \leq f \leq 1.1$ . For vibrational modes of the same species, a single random factor was selected and modified by the function given in Equation S1, which dampens or amplifies the factor when it is applied to wavenumbers larger or smaller than  $100 \text{ cm}^{-1}$  respectively. For variation in the  $\langle \Delta E \rangle_{\text{down}}$  parameter, we selected a single random factor to be applied to all modelled wells in a calculation, from a variation range of  $1/1.2 \leq f \leq 1.2$ .

Additionally, we included variations in rate coefficients of reactions modelled with ILT and bimolecular sinks respectively, applying random multiplicative factors. We selected a variation range of  $1/1.2 \leq f \leq 1.2$  for the imidazole + OH reaction, a range of  $1/3 \leq f \leq 3$  for  $\text{O}_2$  addition to alkyl radicals and dissociation of post-reactive complexes, and a range of  $1/1.2 \leq f \leq 1.2$  for  $\text{RO}_2 + \text{NO}$  reactions. For the initial  $\text{O}_2$  addition reactions (producing first-generation  $\text{RO}_2$ ), we employed an additional random factor. First, a single factor was picked from an external variation range of  $1/3 \leq f \leq 3$  and applied to all reactions. Next, a second random factor was picked for each individual reaction from an internal variation range of  $1/1.2 \leq f \leq 1.2$ . For the sake of limiting computational costs, the grain size was increased to  $100 \text{ cm}^{-1}$  in the RRKM-ME calculations for the uncertainty analysis. Once the results from this analysis were obtained, standard deviations ( $\pm \sigma$ ) were calculated from the logit-transformed distribution of branching ratios, to ensure that uncertainty ranges are kept within 0 and 1.

$$\begin{cases} f_{v,i} = \left( \left( \frac{100 \text{ cm}^{-1}}{\nu_i} \right) (f - 1) \right) + 1, & \text{for } f > 1 \\ f_{v,i} = \left( \left( \left( \frac{100 \text{ cm}^{-1}}{\nu_i} \right) (1 - f) \right) + 1 \right)^{-1}, & \text{for } f < 1 \end{cases} \quad (\text{S1})$$

## S2 M12a cyclization and 1,5 H-shift

From the three consecutive reaction steps involved in the H-shift leading from M12a to M19a, the first bond torsion (via TS17a) has the highest associated energy barrier, and would therefore be the rate-determining step of the channel. Also, the calculated ZPE-corrected energy is lower for the transition state of the H-shift (TS19a) than for its connected reactant (M18a). For this reason, this step was not included explicitly in the ME treatment, assuming that species M17a is directly connected to M19a through the torsional transition state TS18a.

Species M12a may also react by cyclization (via TS16a), where the carbonyl O attacks the radical center, forming a 6-membered ring. Alongside ring closure, a new radical center develops at a N-imino substituted carbon, which grants the transition state TS16a considerable resonance stabilization. Due to this effect, the barrier to this reaction is relatively low, with a value of  $7.05 \text{ kcal mol}^{-1}$ . An analogous reaction (via TS16s) is possible for species M12s, but it is endothermic and has a much higher barrier ( $17.30 \text{ kcal mol}^{-1}$ ). In this case, formation of a 6-membered ring leads to a net loss of resonance stabilization and requires an intramolecular H-bond to be broken.

Cyclization constitutes a minor channel for M12a, with a yield of 0.4 % at 298 K, and it is negligible for M12s. The H-shift channel initiated via the torsional transition state TS17a is also minor for M12a, but with a slightly higher yield (1.9% at 298 K), despite involving a reaction energy barrier  $\sim 2.6 \text{ kcal mol}^{-1}$  higher than cyclization. The entropic penalty to cyclization, as seen from the smaller ratio between transition state and reactant partition functions ( $Q_{TS}/Q_R$ ) in Table 3, cannot explain this observation, and neither can tunnelling, having a minimal impact on the rate coefficients of these reactions. Thus, excess vibrational energy carried over from the preceding reactions ( $4a\text{-RO}_2 + \text{NO} \longrightarrow 4a\text{-RO} + \text{NO}_2$  and  $4a\text{-RO}$  C–C bond scission) may be affecting product yields, favoring the H-shift over cyclization.

M12a cyclization (via TS16a) is exothermic, but mildly so ( $\Delta E = -11.4 \text{ kcal mol}^{-1}$ ), meaning that back-reaction may be significant for vibrationally hot molecules. The 1,5 H-shift (via TS17a through TS19a) is  $\sim 13.7 \text{ kcal mol}^{-1}$  more exothermic, and should be much less affected by back-reactions. Over the short time-scales in which these radicals exist, this effect can diminish the yields from cyclization. Results from a RRKM-ME time-evolution calculated with the thermalized alkoxy radical  $4a\text{-RO}$  as the starting reactant, in which case the excess energy from the  $4a\text{-RO}_2 + \text{NO} \longrightarrow 4a\text{-RO} + \text{NO}_2$  reaction is ignored, show that the yield of these channels are both reduced, and cyclization (0.4%) surpasses the H-shift (0.3%) in importance. If the excess energy from  $4a\text{-RO}$  C–C bond scission is also ignored, assigning the thermalized M12a species as starting reactant, both channels become negligible (yield  $\sim 0.0\%$ ).

## S3 Endocyclization pathways

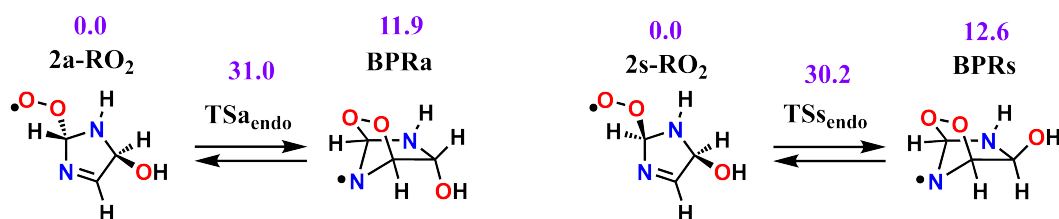

**Figure S1** 2-RO<sub>2</sub> endocyclization. Relative zero-point-corrected energies given in  $\text{kcal mol}^{-1}$ , calculated at the ROHF-ROCCSD(T)-F12a/cc-pVDZ-F12// $\omega$ B97X-D/aug-cc-pVTZ level of theory.

## S4 Numerical values for product yields and standard deviations

### S4.1 First-generation RO<sub>2</sub>

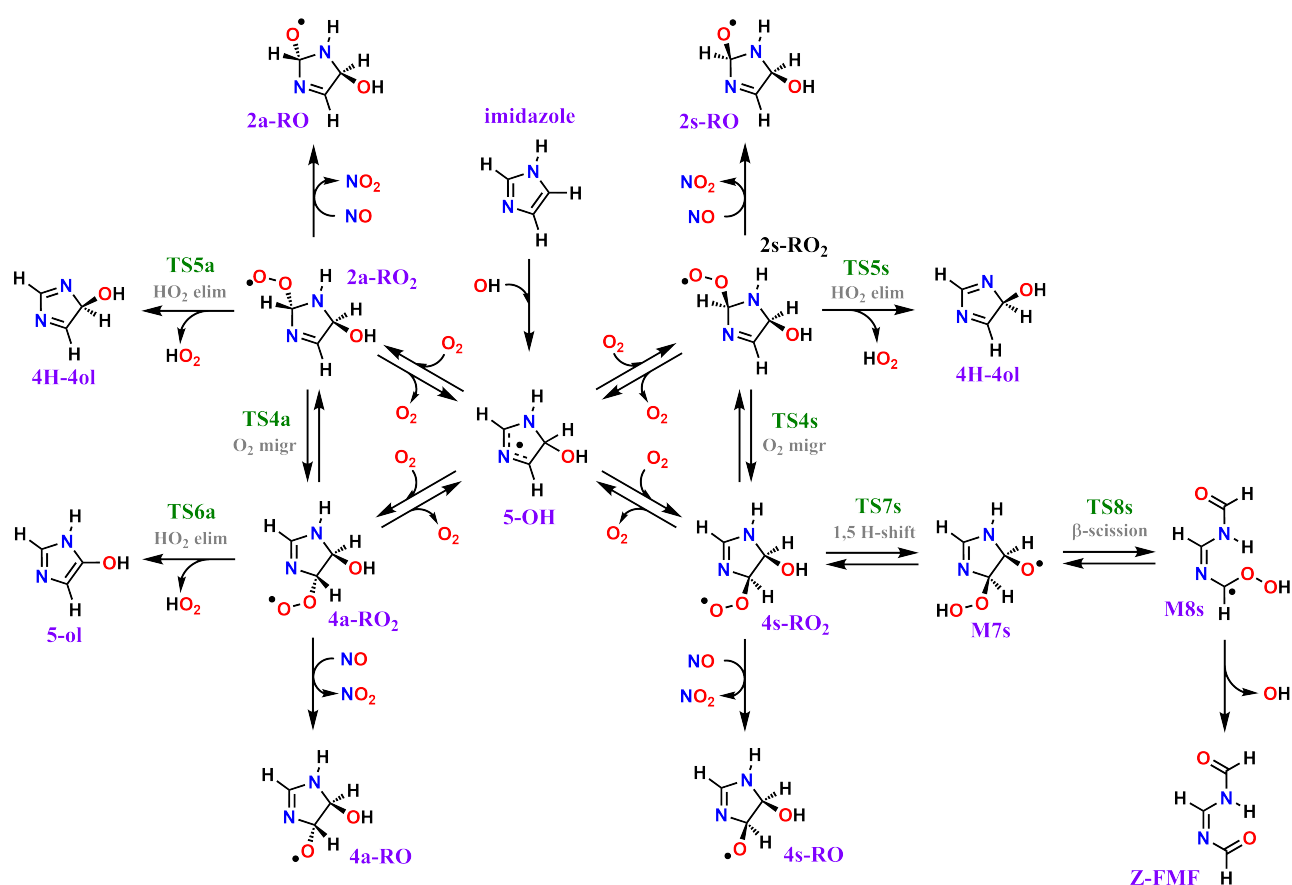

**Figure S2** Reaction mechanism for first-generation RO<sub>2</sub>.

**Table S1** Product yields obtained from RRKM-ME calculations for reaction of first-generation RO<sub>2</sub> radicals at 1 atm and 10 ppt NO. Standard deviations ( $\pm\sigma$ ) calculated with the logit-transformed distribution of yields obtained with uncertainty analysis.

| Temperature (K) | Product yields (%) ( $\pm\sigma$ ); [NO] = 10 ppt |                                            |                                            |                                           |                                           |                                         |
|-----------------|---------------------------------------------------|--------------------------------------------|--------------------------------------------|-------------------------------------------|-------------------------------------------|-----------------------------------------|
|                 | 5-ol                                              | 4H-4ol                                     | Z-FMF                                      | 4s-RO                                     | 4a-RO                                     | 2-RO                                    |
| 250.00          | 0.0 <sup>(+0.1)</sup> <sub>(-0.0)</sub>           | 0.2 <sup>(+0.1)</sup> <sub>(-0.1)</sub>    | 0.7 <sup>(+0.7)</sup> <sub>(-0.5)</sub>    | 31.2 <sup>(+10.5)</sup> <sub>(-7.5)</sub> | 67.7 <sup>(+7.5)</sup> <sub>(-10.7)</sub> | 0.2 <sup>(+0.1)</sup> <sub>(-0.0)</sub> |
| 262.50          | 0.0 <sup>(+0.1)</sup> <sub>(-0.0)</sub>           | 1.2 <sup>(+0.9)</sup> <sub>(-0.5)</sub>    | 3.1 <sup>(+2.3)</sup> <sub>(-1.3)</sub>    | 25.2 <sup>(+8.7)</sup> <sub>(-6.6)</sub>  | 70.3 <sup>(+6.7)</sup> <sub>(-10.3)</sub> | 0.2 <sup>(+0.1)</sup> <sub>(-0.1)</sub> |
| 275.00          | 0.0 <sup>(+0.1)</sup> <sub>(-0.0)</sub>           | 6.3 <sup>(+4.4)</sup> <sub>(-2.5)</sub>    | 13.3 <sup>(+6.9)</sup> <sub>(-5.6)</sub>   | 20.5 <sup>(+8.1)</sup> <sub>(-6.7)</sub>  | 59.6 <sup>(+8.0)</sup> <sub>(-12.6)</sub> | 0.2 <sup>(+0.1)</sup> <sub>(-0.1)</sub> |
| 287.50          | 0.1 <sup>(+0.1)</sup> <sub>(-0.0)</sub>           | 20.4 <sup>(+9.7)</sup> <sub>(-6.6)</sub>   | 34.0 <sup>(+10.6)</sup> <sub>(-13.2)</sub> | 11.6 <sup>(+3.9)</sup> <sub>(-3.3)</sub>  | 33.8 <sup>(+9.7)</sup> <sub>(-11.1)</sub> | 0.1 <sup>(+0.0)</sup> <sub>(-0.0)</sub> |
| 298.00          | 0.1 <sup>(+0.1)</sup> <sub>(-0.0)</sub>           | 33.7 <sup>(+15.6)</sup> <sub>(-9.4)</sub>  | 47.0 <sup>(+11.3)</sup> <sub>(-16.6)</sub> | 4.9 <sup>(+2.2)</sup> <sub>(-2.3)</sub>   | 14.2 <sup>(+5.0)</sup> <sub>(-5.9)</sub>  | 0.1 <sup>(+0.0)</sup> <sub>(-0.0)</sub> |
| 312.50          | 0.2 <sup>(+0.1)</sup> <sub>(-0.1)</sub>           | 45.0 <sup>(+17.4)</sup> <sub>(-11.3)</sub> | 50.1 <sup>(+11.2)</sup> <sub>(-18.1)</sub> | 1.2 <sup>(+0.4)</sup> <sub>(-0.5)</sub>   | 3.4 <sup>(+1.8)</sup> <sub>(-1.4)</sub>   | 0.0 <sup>(+0.1)</sup> <sub>(-0.0)</sub> |
| 325.00          | 0.3 <sup>(+0.2)</sup> <sub>(-0.1)</sub>           | 50.9 <sup>(+16.1)</sup> <sub>(-12.5)</sub> | 47.4 <sup>(+12.2)</sup> <sub>(-16.7)</sub> | 0.3 <sup>(+0.2)</sup> <sub>(-0.1)</sub>   | 1.0 <sup>(+0.6)</sup> <sub>(-0.4)</sub>   | 0.0 <sup>(+0.1)</sup> <sub>(-0.0)</sub> |
| 337.50          | 0.4 <sup>(+0.3)</sup> <sub>(-0.2)</sub>           | 55.4 <sup>(+17.8)</sup> <sub>(-9.3)</sub>  | 43.8 <sup>(+9.1)</sup> <sub>(-18.0)</sub>  | 0.1 <sup>(+0.0)</sup> <sub>(-0.0)</sub>   | 0.3 <sup>(+0.1)</sup> <sub>(-0.1)</sub>   | 0.0 <sup>(+0.1)</sup> <sub>(-0.0)</sub> |
| 350.00          | 0.5 <sup>(+0.3)</sup> <sub>(-0.2)</sub>           | 59.2 <sup>(+14.0)</sup> <sub>(-13.1)</sub> | 40.2 <sup>(+13.0)</sup> <sub>(-14.2)</sub> | 0.0 <sup>(+0.1)</sup> <sub>(-0.0)</sub>   | 0.1 <sup>(+0.0)</sup> <sub>(-0.0)</sub>   | 0.0 <sup>(+0.1)</sup> <sub>(-0.0)</sub> |

**Table S2** Product yields obtained from RRKM-ME calculations for reaction of first-generation RO<sub>2</sub> radicals at 1 atm, with 100 ppt NO and 1 ppb NO. Standard deviations ( $\pm\sigma$ ) calculated with the logit-transformed distribution of yields obtained with uncertainty analysis.

| Temperature (K) | Product yields (%) ( $\pm\sigma$ ); [NO] = 100 ppt |                                            |                                            |                                          |                                           |                                         |
|-----------------|----------------------------------------------------|--------------------------------------------|--------------------------------------------|------------------------------------------|-------------------------------------------|-----------------------------------------|
|                 | 5-ol                                               | 4H-4ol                                     | Z-FMF                                      | 4s-RO                                    | 4a-RO                                     | 2-RO                                    |
| 250.00          | 0.0 <sup>(+0.1)</sup> <sub>(-0.0)</sub>            | 0.1 <sup>(+0.1)</sup> <sub>(-0.0)</sub>    | 0.1 <sup>(+0.1)</sup> <sub>(-0.0)</sub>    | 43.1 <sup>(+4.0)</sup> <sub>(-5.1)</sub> | 56.5 <sup>(+5.0)</sup> <sub>(-3.9)</sub>  | 0.2 <sup>(+0.1)</sup> <sub>(-0.1)</sub> |
| 262.50          | 0.0 <sup>(+0.1)</sup> <sub>(-0.0)</sub>            | 0.2 <sup>(+0.1)</sup> <sub>(-0.0)</sub>    | 0.4 <sup>(+0.3)</sup> <sub>(-0.2)</sub>    | 32.9 <sup>(+8.9)</sup> <sub>(-7.2)</sub> | 66.3 <sup>(+7.0)</sup> <sub>(-8.9)</sub>  | 0.2 <sup>(+0.1)</sup> <sub>(-0.1)</sub> |
| 275.00          | 0.0 <sup>(+0.1)</sup> <sub>(-0.0)</sub>            | 0.8 <sup>(+0.6)</sup> <sub>(-0.3)</sub>    | 1.7 <sup>(+1.4)</sup> <sub>(-0.8)</sub>    | 26.3 <sup>(+7.3)</sup> <sub>(-8.0)</sub> | 70.9 <sup>(+7.9)</sup> <sub>(-8.2)</sub>  | 0.2 <sup>(+0.1)</sup> <sub>(-0.1)</sub> |
| 287.50          | 0.0 <sup>(+0.1)</sup> <sub>(-0.0)</sub>            | 4.0 <sup>(+3.3)</sup> <sub>(-1.1)</sub>    | 6.7 <sup>(+4.5)</sup> <sub>(-3.6)</sub>    | 23.0 <sup>(+7.1)</sup> <sub>(-7.9)</sub> | 65.9 <sup>(+9.2)</sup> <sub>(-11.6)</sub> | 0.3 <sup>(+0.1)</sup> <sub>(-0.1)</sub> |
| 298.00          | 0.0 <sup>(+0.1)</sup> <sub>(-0.0)</sub>            | 12.4 <sup>(+6.4)</sup> <sub>(-4.7)</sub>   | 17.3 <sup>(+9.2)</sup> <sub>(-7.2)</sub>   | 18.1 <sup>(+4.4)</sup> <sub>(-6.6)</sub> | 51.9 <sup>(+9.9)</sup> <sub>(-11.4)</sub> | 0.3 <sup>(+0.1)</sup> <sub>(-0.1)</sub> |
| 312.50          | 0.1 <sup>(+0.1)</sup> <sub>(-0.0)</sub>            | 31.8 <sup>(+11.1)</sup> <sub>(-10.0)</sub> | 35.5 <sup>(+11.9)</sup> <sub>(-12.8)</sub> | 8.4 <sup>(+3.3)</sup> <sub>(-3.0)</sub>  | 24.0 <sup>(+7.7)</sup> <sub>(-8.3)</sub>  | 0.1 <sup>(+0.0)</sup> <sub>(-0.0)</sub> |
| 325.00          | 0.2 <sup>(+0.1)</sup> <sub>(-0.1)</sub>            | 45.5 <sup>(+14.1)</sup> <sub>(-12.5)</sub> | 42.4 <sup>(+12.9)</sup> <sub>(-15.0)</sub> | 3.0 <sup>(+1.1)</sup> <sub>(-1.2)</sub>  | 8.7 <sup>(+4.1)</sup> <sub>(-3.8)</sub>   | 0.1 <sup>(+0.0)</sup> <sub>(-0.0)</sub> |
| 337.50          | 0.4 <sup>(+0.2)</sup> <sub>(-0.2)</sub>            | 53.5 <sup>(+16.9)</sup> <sub>(-10.7)</sub> | 42.3 <sup>(+10.4)</sup> <sub>(-17.1)</sub> | 1.0 <sup>(+0.5)</sup> <sub>(-0.4)</sub>  | 2.8 <sup>(+1.2)</sup> <sub>(-1.1)</sub>   | 0.0 <sup>(+0.1)</sup> <sub>(-0.0)</sub> |
| 350.00          | 0.5 <sup>(+0.4)</sup> <sub>(-0.2)</sub>            | 58.5 <sup>(+15.1)</sup> <sub>(-11.2)</sub> | 39.7 <sup>(+10.9)</sup> <sub>(-15.1)</sub> | 0.3 <sup>(+0.1)</sup> <sub>(-0.1)</sub>  | 0.9 <sup>(+0.3)</sup> <sub>(-0.4)</sub>   | 0.0 <sup>(+0.1)</sup> <sub>(-0.0)</sub> |
| Temperature (K) | Product yields (%) ( $\pm\sigma$ ); [NO] = 1 ppb   |                                            |                                            |                                          |                                           |                                         |
|                 | 5-ol                                               | 4H-4ol                                     | Z-FMF                                      | 4s-RO                                    | 4a-RO                                     | 2-RO                                    |
| 250.00          | 0.0 <sup>(+0.1)</sup> <sub>(-0.0)</sub>            | 0.0 <sup>(+0.1)</sup> <sub>(-0.0)</sub>    | 0.0 <sup>(+0.1)</sup> <sub>(-0.0)</sub>    | 47.1 <sup>(+2.6)</sup> <sub>(-3.2)</sub> | 52.5 <sup>(+3.1)</sup> <sub>(-2.7)</sub>  | 0.3 <sup>(+0.2)</sup> <sub>(-0.1)</sub> |
| 262.50          | 0.0 <sup>(+0.1)</sup> <sub>(-0.0)</sub>            | 0.1 <sup>(+0.1)</sup> <sub>(-0.0)</sub>    | 0.1 <sup>(+0.1)</sup> <sub>(-0.0)</sub>    | 43.8 <sup>(+4.3)</sup> <sub>(-5.3)</sub> | 55.7 <sup>(+5.2)</sup> <sub>(-4.3)</sub>  | 0.3 <sup>(+0.2)</sup> <sub>(-0.1)</sub> |
| 275.00          | 0.0 <sup>(+0.1)</sup> <sub>(-0.0)</sub>            | 0.1 <sup>(+0.1)</sup> <sub>(-0.0)</sub>    | 0.2 <sup>(+0.2)</sup> <sub>(-0.1)</sub>    | 35.0 <sup>(+7.7)</sup> <sub>(-6.1)</sub> | 64.3 <sup>(+6.0)</sup> <sub>(-7.7)</sub>  | 0.3 <sup>(+0.1)</sup> <sub>(-0.1)</sub> |
| 287.50          | 0.0 <sup>(+0.1)</sup> <sub>(-0.0)</sub>            | 0.5 <sup>(+0.4)</sup> <sub>(-0.2)</sub>    | 0.8 <sup>(+0.6)</sup> <sub>(-0.4)</sub>    | 27.9 <sup>(+8.5)</sup> <sub>(-7.9)</sub> | 70.4 <sup>(+7.8)</sup> <sub>(-8.9)</sub>  | 0.3 <sup>(+0.1)</sup> <sub>(-0.1)</sub> |
| 298.00          | 0.0 <sup>(+0.1)</sup> <sub>(-0.0)</sub>            | 1.8 <sup>(+1.1)</sup> <sub>(-0.6)</sub>    | 2.4 <sup>(+1.8)</sup> <sub>(-1.0)</sub>    | 25.3 <sup>(+9.8)</sup> <sub>(-6.0)</sub> | 70.1 <sup>(+6.0)</sup> <sub>(-11.1)</sub> | 0.4 <sup>(+0.1)</sup> <sub>(-0.1)</sub> |
| 312.50          | 0.0 <sup>(+0.1)</sup> <sub>(-0.0)</sub>            | 8.2 <sup>(+4.6)</sup> <sub>(-2.9)</sub>    | 9.1 <sup>(+5.7)</sup> <sub>(-3.5)</sub>    | 21.4 <sup>(+7.4)</sup> <sub>(-6.8)</sub> | 60.9 <sup>(+8.1)</sup> <sub>(-12.7)</sub> | 0.4 <sup>(+0.1)</sup> <sub>(-0.1)</sub> |
| 325.00          | 0.1 <sup>(+0.0)</sup> <sub>(-0.0)</sub>            | 22.1 <sup>(+8.8)</sup> <sub>(-7.0)</sub>   | 20.6 <sup>(+9.6)</sup> <sub>(-7.4)</sub>   | 14.8 <sup>(+4.1)</sup> <sub>(-5.4)</sub> | 42.1 <sup>(+8.6)</sup> <sub>(-11.3)</sub> | 0.3 <sup>(+0.1)</sup> <sub>(-0.1)</sub> |
| 337.50          | 0.3 <sup>(+0.2)</sup> <sub>(-0.1)</sub>            | 39.9 <sup>(+15.1)</sup> <sub>(-10.5)</sub> | 31.5 <sup>(+10.2)</sup> <sub>(-13.1)</sub> | 7.3 <sup>(+2.7)</sup> <sub>(-2.9)</sub>  | 20.8 <sup>(+5.8)</sup> <sub>(-7.4)</sub>  | 0.2 <sup>(+0.1)</sup> <sub>(-0.1)</sub> |
| 350.00          | 0.4 <sup>(+0.2)</sup> <sub>(-0.2)</sub>            | 52.5 <sup>(+12.4)</sup> <sub>(-13.0)</sub> | 35.7 <sup>(+12.8)</sup> <sub>(-12.7)</sub> | 2.9 <sup>(+1.3)</sup> <sub>(-1.2)</sub>  | 8.4 <sup>(+3.2)</sup> <sub>(-3.1)</sub>   | 0.1 <sup>(+0.0)</sup> <sub>(-0.0)</sub> |

## S4.2 Alkoxy radical products

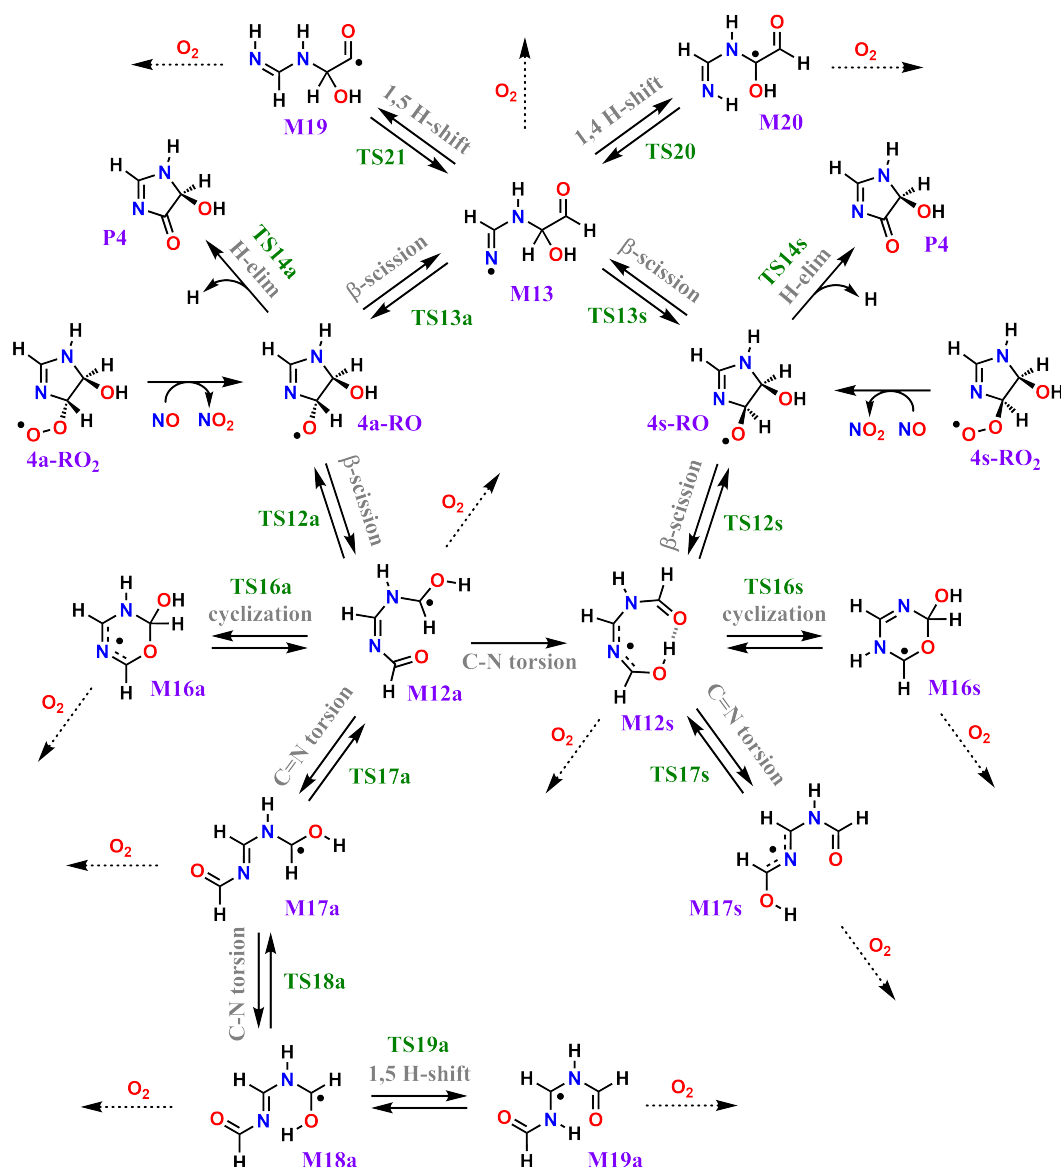

**Figure S3** Reaction mechanism for alkoxy radical products.

**Table S3** Product yields obtained from RRKM-ME calculations for reaction of alkoxy radical 4a-RO at 1 atm. Standard deviations ( $\pm\sigma$ ) calculated with the logit-transformed distribution of yields obtained with uncertainty analysis.

| Temperature (K) | Product yields (%) ( $\pm\sigma$ )       |                                         |                                         |
|-----------------|------------------------------------------|-----------------------------------------|-----------------------------------------|
|                 | M12s-OO + M17s-OO                        | M19a-OO                                 | M16a-OO                                 |
| 250.00          | 98.2 <sup>(+0.8)</sup> <sub>(-1.5)</sub> | 1.5 <sup>(+1.4)</sup> <sub>(-0.6)</sub> | 0.5 <sup>(+0.3)</sup> <sub>(-0.2)</sub> |
| 275.00          | 98.0 <sup>(+0.9)</sup> <sub>(-1.8)</sub> | 1.7 <sup>(+1.6)</sup> <sub>(-0.7)</sub> | 0.4 <sup>(+0.3)</sup> <sub>(-0.2)</sub> |
| 298.15          | 97.8 <sup>(+1.0)</sup> <sub>(-1.4)</sub> | 1.9 <sup>(+1.3)</sup> <sub>(-0.8)</sub> | 0.4 <sup>(+0.3)</sup> <sub>(-0.1)</sub> |
| 325.00          | 97.5 <sup>(+1.1)</sup> <sub>(-1.7)</sub> | 2.2 <sup>(+1.7)</sup> <sub>(-1.0)</sub> | 0.4 <sup>(+0.1)</sup> <sub>(-0.1)</sub> |
| 350.00          | 97.1 <sup>(+1.0)</sup> <sub>(-2.1)</sub> | 2.6 <sup>(+2.0)</sup> <sub>(-0.8)</sub> | 0.3 <sup>(+0.2)</sup> <sub>(-0.1)</sub> |

**Table S4** Product yields obtained from RRKM-ME calculations for reaction of alkoxy radical 4s-RO at 1 atm. Standard deviations ( $\pm\sigma$ ) calculated with the logit-transformed distribution of yields obtained with uncertainty analysis.

| Temperature (K) | Product yields (%) ( $\pm\sigma$ ) |                         |                         |                         |
|-----------------|------------------------------------|-------------------------|-------------------------|-------------------------|
|                 | M12s-OO + M17s-OO                  | M13-OO                  | M20-OO                  | M21-OO                  |
| 250.00          | 96.3( $^{+1.6}_{-3.3}$ )           | 3.1( $^{+2.2}_{-1.6}$ ) | 0.2( $^{+0.4}_{-0.1}$ ) | 0.6( $^{+1.1}_{-0.4}$ ) |
| 275.00          | 96.0( $^{+1.7}_{-2.5}$ )           | 2.5( $^{+1.7}_{-1.6}$ ) | 0.4( $^{+0.6}_{-0.3}$ ) | 1.4( $^{+1.6}_{-1.0}$ ) |
| 298.15          | 95.8( $^{+1.6}_{-3.3}$ )           | 1.5( $^{+1.5}_{-0.8}$ ) | 0.5( $^{+1.1}_{-0.3}$ ) | 2.4( $^{+1.8}_{-1.4}$ ) |
| 325.00          | 95.7( $^{+2.1}_{-2.5}$ )           | 0.6( $^{+0.6}_{-0.4}$ ) | 0.6( $^{+0.7}_{-0.4}$ ) | 3.3( $^{+1.9}_{-1.9}$ ) |
| 350.00          | 95.6( $^{+1.7}_{-3.3}$ )           | 0.2( $^{+0.2}_{-0.1}$ ) | 0.5( $^{+0.7}_{-0.3}$ ) | 3.7( $^{+2.8}_{-1.6}$ ) |

### S4.3 Second-generation RO<sub>2</sub>

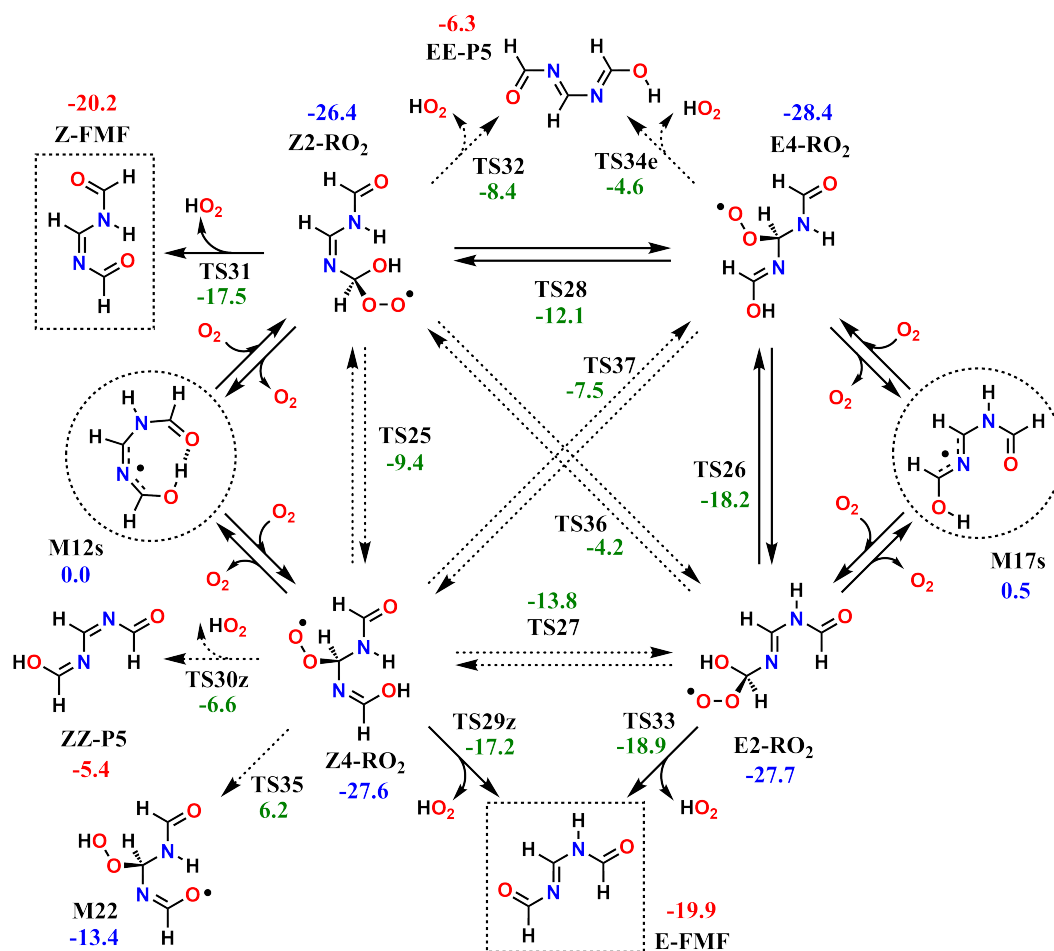

**Figure S4** Reaction mechanism for second-generation RO<sub>2</sub>. Relative zero-point-corrected energies given in kcal mol<sup>-1</sup>, calculated at the ROHF-ROCCSD(T)-F12a/cc-pVDZ-F12// $\omega$ B97X-D/aug-cc-pVTZ level of theory.<sup>3-7</sup>

**Table S5** Product yields obtained from RRKM-ME calculations for reaction of second-generation RO<sub>2</sub> radicals at 1 atm, derived from 4a-RO and from 4s-RO. Standard deviations ( $\pm\sigma$ ) calculated with the logit-transformed distribution of yields obtained with uncertainty analysis.

| Temperature (K) | Product yields (%) ( $\pm\sigma$ )       |                                         |                                          |                                         |
|-----------------|------------------------------------------|-----------------------------------------|------------------------------------------|-----------------------------------------|
|                 | from 4a-RO                               |                                         | From 4s-RO                               |                                         |
|                 | E-FMF                                    | Z-FMF                                   | E-FMF                                    | Z-FMF                                   |
| 250.00          | 91.5 <sup>(+3.2)</sup> <sub>(-6.6)</sub> | 8.5 <sup>(+6.1)</sup> <sub>(-3.3)</sub> | 91.2 <sup>(+2.5)</sup> <sub>(-7.5)</sub> | 8.5 <sup>(+5.9)</sup> <sub>(-2.8)</sub> |
| 275.00          | 91.4 <sup>(+3.4)</sup> <sub>(-7.0)</sub> | 8.6 <sup>(+6.0)</sup> <sub>(-3.4)</sub> | 91.4 <sup>(+3.7)</sup> <sub>(-6.9)</sub> | 8.6 <sup>(+5.8)</sup> <sub>(-3.5)</sub> |
| 298.15          | 91.2 <sup>(+3.4)</sup> <sub>(-7.0)</sub> | 8.8 <sup>(+6.4)</sup> <sub>(-3.3)</sub> | 91.2 <sup>(+4.3)</sup> <sub>(-7.4)</sub> | 8.8 <sup>(+5.4)</sup> <sub>(-4.2)</sub> |
| 325.00          | 91.0 <sup>(+2.5)</sup> <sub>(-7.0)</sub> | 9.0 <sup>(+6.7)</sup> <sub>(-2.8)</sub> | 91.0 <sup>(+3.4)</sup> <sub>(-8.5)</sub> | 9.0 <sup>(+7.5)</sup> <sub>(-2.9)</sub> |
| 350.00          | 90.7 <sup>(+4.1)</sup> <sub>(-6.8)</sub> | 9.3 <sup>(+5.8)</sup> <sub>(-4.1)</sub> | 90.7 <sup>(+4.3)</sup> <sub>(-7.8)</sub> | 9.3 <sup>(+6.1)</sup> <sub>(-4.3)</sub> |



## S5 Barriers and rate coefficients for second-generation RO<sub>2</sub>

**Table S6** Reaction barrier heights ( $\Delta^\ddagger E_{v=0}$ ) calculated as the difference in zero-point corrected energy between TS and reactant, calculated at ROHF-ROCCSD(T)-F12a/cc-pVDZ-F12// $\omega$ B97X-D/aug-cc-pVTZ level of theory, for unimolecular reaction steps available to second-generation RO<sub>2</sub> intermediates. Thermal rate coefficients estimated with lowest-conformer TST ( $k_{LC-TST}$ ) and multi-conformer TST ( $k_{MC-TST}$ ), ratio between MC-TST and LC-TST rate coefficients ( $k_{MC}/k_{LC}$ ), ratio of lowest-conformer partition functions ( $Q_{TS}/Q_R$ ) and Eckart tunnelling factors ( $\kappa$ ).

| Reaction step                                                | $\Delta^\ddagger E_{v=0}$<br>(kcal mol <sup>-1</sup> ) | $k_{LC-TST}$ (s <sup>-1</sup> ) | $k_{MC-TST}$ (s <sup>-1</sup> ) | $k_{MC}/k_{LC}$ | $Q_{TS}/Q_R$ | $\kappa$ |
|--------------------------------------------------------------|--------------------------------------------------------|---------------------------------|---------------------------------|-----------------|--------------|----------|
| E2-RO <sub>2</sub> $\longrightarrow$ E4-RO <sub>2</sub>      | 9.49                                                   | $1.78 \times 10^5$              | $5.15 \times 10^4$              | 0.29            | 0.24         | 1.05     |
| E2-RO <sub>2</sub> $\longrightarrow$ Z4-RO <sub>2</sub>      | 13.96                                                  | $9.74 \times 10^1$              | $4.65 \times 10^1$              | 0.48            | 0.25         | 1.06     |
| E2-RO <sub>2</sub> $\longrightarrow$ Z2-RO <sub>2</sub>      | 23.47                                                  | $4.90 \times 10^{-5}$           | $6.02 \times 10^{-5}$           | 1.23            | 1.19         | 1.05     |
| E2-RO <sub>2</sub> $\longrightarrow$ E-FMF + HO <sub>2</sub> | 8.83                                                   | $4.30 \times 10^6$              | $2.21 \times 10^6$              | 0.51            | 0.84         | 2.43     |
| E4-RO <sub>2</sub> $\longrightarrow$ E2-RO <sub>2</sub>      | 10.15                                                  | $5.83 \times 10^4$              | $1.69 \times 10^4$              | 0.29            | 0.21         | 1.05     |
| E4-RO <sub>2</sub> $\longrightarrow$ Z2-RO <sub>2</sub>      | 16.34                                                  | $1.92 \times 10^0$              | $1.26 \times 10^0$              | 0.66            | 0.28         | 1.06     |
| E4-RO <sub>2</sub> $\longrightarrow$ Z4-RO <sub>2</sub>      | 20.94                                                  | $8.70 \times 10^{-4}$           | $1.95 \times 10^{-3}$           | 2.24            | 0.29         | 1.06     |
| E4-RO <sub>2</sub> $\longrightarrow$ EE-P5 + HO <sub>2</sub> | 23.76                                                  | $6.39 \times 10^{-5}$           | $6.22 \times 10^{-5}$           | 0.97            | 1.14         | 2.36     |
| Z2-RO <sub>2</sub> $\longrightarrow$ Z4-RO <sub>2</sub>      | 16.99                                                  | $1.09 \times 10^0$              | $6.38 \times 10^{-1}$           | 0.59            | 0.46         | 1.07     |
| Z2-RO <sub>2</sub> $\longrightarrow$ E4-RO <sub>2</sub>      | 14.38                                                  | $5.27 \times 10^1$              | $3.47 \times 10^1$              | 0.66            | 0.61         | 1.06     |
| Z2-RO <sub>2</sub> $\longrightarrow$ E2-RO <sub>2</sub>      | 22.16                                                  | $4.42 \times 10^{-4}$           | $5.44 \times 10^{-4}$           | 1.23            | 2.26         | 1.05     |
| Z2-RO <sub>2</sub> $\longrightarrow$ Z-FMF + HO <sub>2</sub> | 8.93                                                   | $6.42 \times 10^6$              | $1.02 \times 10^7$              | 1.59            | 1.48         | 2.45     |
| Z2-RO <sub>2</sub> $\longrightarrow$ EE-P5 + HO <sub>2</sub> | 17.99                                                  | $1.65 \times 10^0$              | $1.05 \times 10^0$              | 0.64            | 1.43         | 2.87     |
| Z4-RO <sub>2</sub> $\longrightarrow$ Z2-RO <sub>2</sub>      | 18.16                                                  | $1.49 \times 10^{-1}$           | $8.73 \times 10^{-2}$           | 0.59            | 0.79         | 1.07     |
| Z4-RO <sub>2</sub> $\longrightarrow$ E2-RO <sub>2</sub>      | 13.83                                                  | $1.21 \times 10^2$              | $5.75 \times 10^1$              | 0.48            | 0.82         | 1.06     |
| Z4-RO <sub>2</sub> $\longrightarrow$ E4-RO <sub>2</sub>      | 20.15                                                  | $3.28 \times 10^{-3}$           | $7.33 \times 10^{-3}$           | 2.23            | 1.11         | 1.06     |
| Z4-RO <sub>2</sub> $\longrightarrow$ E-FMF + HO <sub>2</sub> | 10.37                                                  | $5.82 \times 10^5$              | $3.14 \times 10^5$              | 0.54            | 1.75         | 2.12     |
| Z4-RO <sub>2</sub> $\longrightarrow$ ZZ-P5 + HO <sub>2</sub> | 20.97                                                  | $1.11 \times 10^{-2}$           | $5.03 \times 10^{-2}$           | 0.45            | 2.82         | 1.49     |
| Z4-RO <sub>2</sub> $\longrightarrow$ M22                     | 21.41                                                  | $9.07 \times 10^{-4}$           | $4.42 \times 10^{-4}$           | 0.49            | 0.61         | 1.18     |

## S6 Pressure dependence of product yields

Additional RRKM-ME calculations at different pressures (0.1, 0.5, 5 and 10 atm) were performed for the first-generation RO<sub>2</sub> reactions, whose results are shown in Table S7. We note here that the only parameter changed in these ME runs was the pressure, and the excess reactant concentrations ([O<sub>2</sub>] and [NO]) were kept at the values they would have at 1 atm and 298 K. This was done in order to observe the effect that pressure change *alone* (change of collision frequency) would have on the kinetics of the reaction. The results show a very weak pressure dependence of product yields, possibly indicating that the kinetics of this part of the oxidation mechanism is close to the high-pressure limit. The largest change in yields at the investigated pressure range (0.1-10 atm) was  $\sim 0.5\%$ . Naturally, as the pressure decreases, a slight increase in the yield of unimolecular channels is observed, as vibrationally hot molecules may react prior to significant collisional quenching.

**Table S7** Product yields obtained from RRKM-ME calculations for reaction of first-generation RO<sub>2</sub> radicals at a range of pressures (0.1, 0.5, 1, 5, and 10 atm). The different NO concentrations used correspond to mixing ratios at 1 atm, 298 K (10 ppt, 100 ppt, and 1 ppb).

| Pressure (atm) | Product yields (%); [NO] = 10 ppt  |        |        |        |        |       |
|----------------|------------------------------------|--------|--------|--------|--------|-------|
|                | 5-ol                               | 4H-4ol | Z-FMF  | 4s-RO  | 4a-RO  | 2-RO  |
| 0.1            | 0.131                              | 33.838 | 46.792 | 4.926  | 14.254 | 0.070 |
| 0.5            | 0.118                              | 33.695 | 46.903 | 4.942  | 14.281 | 0.070 |
| 1              | 0.116                              | 33.671 | 46.923 | 4.945  | 14.285 | 0.070 |
| 5              | 0.114                              | 33.647 | 46.943 | 4.948  | 14.286 | 0.070 |
| 10             | 0.114                              | 33.643 | 46.947 | 4.949  | 14.286 | 0.070 |
| Pressure (atm) | Product yields (%); [NO] = 100 ppt |        |        |        |        |       |
|                | 5-ol                               | 4H-4ol | Z-FMF  | 4s-RO  | 4a-RO  | 2-RO  |
| 0.1            | 0.059                              | 12.572 | 17.179 | 18.038 | 51.893 | 0.256 |
| 0.5            | 0.046                              | 12.367 | 17.183 | 18.094 | 52.051 | 0.256 |
| 1              | 0.044                              | 12.333 | 17.184 | 18.103 | 52.077 | 0.257 |
| 5              | 0.042                              | 12.300 | 17.185 | 18.112 | 52.102 | 0.257 |
| 10             | 0.042                              | 12.293 | 17.185 | 18.113 | 52.107 | 0.257 |
| Pressure (atm) | Product yields (%); [NO] = 1 ppb   |        |        |        |        |       |
|                | 5-ol                               | 4H-4ol | Z-FMF  | 4s-RO  | 4a-RO  | 2-RO  |
| 0.1            | 0.023                              | 2.027  | 2.491  | 25.514 | 69.576 | 0.358 |
| 0.5            | 0.010                              | 1.780  | 2.427  | 25.384 | 70.031 | 0.357 |
| 1              | 0.008                              | 1.738  | 2.415  | 25.346 | 70.125 | 0.357 |
| 5              | 0.006                              | 1.696  | 2.401  | 25.286 | 70.244 | 0.356 |
| 10             | 0.006                              | 1.688  | 2.398  | 25.267 | 70.275 | 0.356 |

## S7 Time evolution profiles for first-generation RO<sub>2</sub>

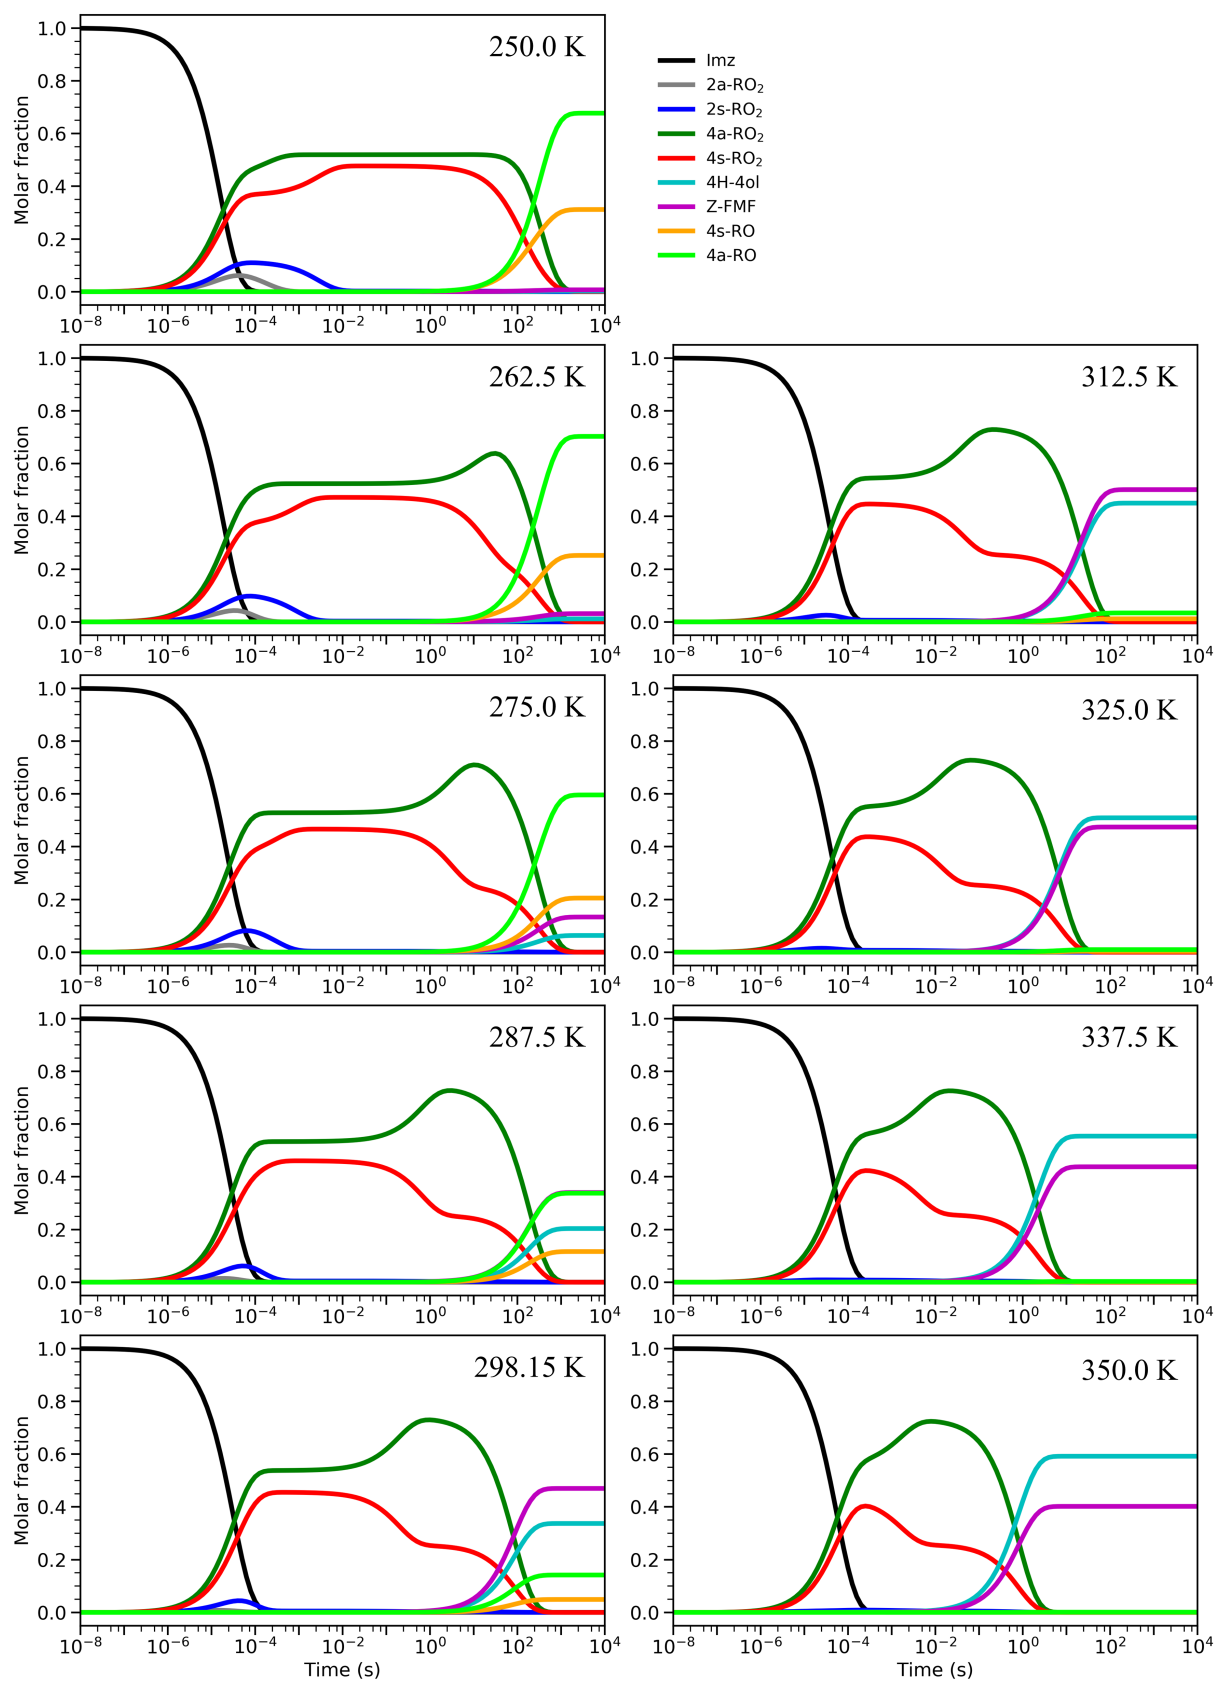

**Figure S5** Time evolution of species distributions from RRKM-ME calculation for the first-generation RO<sub>2</sub> radicals, at 298 K, 1 atm and 10 ppt NO, with imidazole + OH as starting reactants.

## S8 Vertical excitation energies for first-generation RO<sub>2</sub>

Test time dependent DFT (TDDFT) single-point calculations (Table S8) indicate that, for all four first-generation RO<sub>2</sub>, the first electronic excited state is higher in energy than the entrance level (5-OH + O<sub>2</sub>) by at least 6 kcal mol<sup>-1</sup>. Except for isomer 2a-RO<sub>2</sub>, excitation energies obtained with single-point calculations done at the RI-CC2/def2-TZVP<sup>8,9</sup> level using Turbomole v7.8<sup>10,11</sup> agree with TDDFT results within ~ 2 kcal mol<sup>-1</sup>. Moreover, %T2 diagnostics from CC2 calculations indicate a small contribution of double excitations (< 4%). This suggests that RO<sub>2</sub> isomers 2s-RO<sub>2</sub>, 4a-RO<sub>2</sub>, and 4s-RO<sub>2</sub> are unlikely to be formed in their electronic excited states directly from 5-OH + O<sub>2</sub> association. On the other hand, RI-CC2 calculation for isomer 2a-RO<sub>2</sub> yielded a (unphysical) negative first-excitation energy, indicating that the TDDFT results are not reliable for this species. We argue, however, that even if formation of electronically-excited 2a-RO<sub>2</sub> is indeed possible, excited-state reaction channels are unlikely to be competitive with relaxation to the ground-state via internal conversion.<sup>12</sup>

**Table S8** Vertical excitation energy for transition from the electronic ground-state to the first excited state, for the first-generation RO<sub>2</sub>, estimated with single-point Time Dependent Density Functional Theory (TDDFT) calculations at the ωB97XD/aug-cc-pVTZ level of theory, and with single-point RI-CC2/def2-TZVP calculations with frozen core orbitals and UHF reference. Diagnostics for double excitation contributions (%T2) obtained from CC2 calculations. Energies are given in kcal mol<sup>-1</sup>

| Species            | $E(D_0 \rightarrow D_1)$ |      | %T2  |
|--------------------|--------------------------|------|------|
|                    | TDDFT                    | CC2  |      |
| 2a-RO <sub>2</sub> | 26.9                     | —    | —    |
| 2s-RO <sub>2</sub> | 28.4                     | 30.7 | 3.98 |
| 4a-RO <sub>2</sub> | 26.7                     | 28.6 | 3.66 |
| 4s-RO <sub>2</sub> | 27.3                     | 29.4 | 3.75 |

## S9 Multiconfigurational character diagnostics

In addition to the T1 diagnostics, which are provided with CCSD(T)-F12a calculations in Molpro<sup>13-15</sup>, we calculate the percentage of the triples (T) contribution to the total atomization energy as a diagnostic for multiconfigurational character. Values of %TAE[(T)] were calculated as follows<sup>16,17</sup>:

$$\%TAE[(T)] = 100 \times \frac{TAE_{CCSD(T)} - TAE_{CCSD}}{TAE_{CCSD(T)}} \quad (S2)$$

Where  $TAE_{CCSD(T)}$  and  $TAE_{CCSD}$  are calculated as shown for imidazole (C<sub>3</sub>N<sub>2</sub>H<sub>4</sub>):

$$TAE_{CCSD(T)}(C_3N_2H_4) = [(3 \times E_{CCSD(T)C}) + (2 \times E_{CCSD(T)N}) + (4 \times E_{CCSD(T)H})] - E_{CCSD(T)}(C_3N_2H_4) \quad (S3)$$

$$TAE_{CCSD}(C_3N_2H_4) = [(3 \times E_{CCSD}C) + (2 \times E_{CCSD}N) + (4 \times E_{CCSD}H)] - E_{CCSD}(C_3N_2H_4) \quad (S4)$$

The calculated %TAE[(T)] values indicate that, apart from O<sub>2</sub>, NO<sub>2</sub>, and NO, all of the species investigated in this work display mild multiconfigurational character. %TAE[(T)] values in the range of 2-5% indicate the presence of mild static (non-dynamical) correlation, values in the 5-10% range indicate moderate static correlation, and values larger than 10% indicate severe static correlation.

**Table S9** Percentage triples (T) contribution to the total atomization energy %TAE[(T)] and T1 diagnostics from ROHF-ROCCSD(T)-F12a/cc-pVDZ-F12 calculations.

| Species            | %TAE[(T)] | T1 diagnostic | Species            | %TAE[(T)] | T1 diagnostic |
|--------------------|-----------|---------------|--------------------|-----------|---------------|
| imidazole          | 2.16      | 0.013         | 4a-ROONO           | 3.08      | 0.017         |
| OH                 | 1.23      | 0.007         | 4s-ROONO           | 3.10      | 0.017         |
| 5-OH               | 2.13      | 0.019         | 4a-RO              | 2.17      | 0.020         |
| O <sub>2</sub>     | 6.50      | 0.008         | 4s-RO              | 2.14      | 0.019         |
| HO <sub>2</sub>    | 3.72      | 0.034         | TS12a              | 0.05      | 0.028         |
| NO                 | 5.34      | 0.020         | TS12s              | 2.34      | 0.031         |
| NO <sub>2</sub>    | 7.44      | 0.024         | TS13a              | 2.50      | 0.025         |
| 2a-RO <sub>2</sub> | 2.48      | 0.023         | TS13s              | 2.51      | 0.027         |
| 2s-RO <sub>2</sub> | 2.51      | 0.024         | TS14a              | 2.49      | 0.018         |
| 4a-RO <sub>2</sub> | 2.48      | 0.024         | TS14s              | 2.48      | 0.018         |
| 4s-RO <sub>2</sub> | 2.51      | 0.024         | TS15a              | 2.30      | 0.020         |
| TS4a               | 3.19      | 0.031         | TS16a              | 2.59      | 0.024         |
| TS4s               | 3.28      | 0.040         | TS16s              | 2.55      | 0.026         |
| TS5a               | 2.93      | 0.029         | TS17a              | 2.34      | 0.021         |
| TS5s               | 2.95      | 0.029         | TS17s              | 2.35      | 0.018         |
| TS6a               | 3.13      | 0.032         | TS18a              | 2.23      | 0.018         |
| TS7s               | 2.95      | 0.037         | TS19a              | 2.49      | 0.021         |
| TS8s               | 2.70      | 0.020         | TS20               | 2.49      | 0.024         |
| M7s                | 2.86      | 0.019         | TS21               | 2.50      | 0.025         |
| M8s                | 2.62      | 0.019         | M12a               | 2.31      | 0.021         |
| PC5a               | 2.54      | 0.023         | M12s               | 2.38      | 0.019         |
| PC5s               | 2.58      | 0.024         | M13                | 2.13      | 0.016         |
| PC6a               | 2.53      | 0.023         | M16a               | 2.25      | 0.015         |
| 4H-4ol             | 2.29      | 0.015         | M16s               | 2.22      | 0.018         |
| 5-ol               | 2.28      | 0.013         | M17a               | 2.23      | 0.020         |
| Z-FMF              | 2.41      | 0.017         | M17s               | 2.29      | 0.019         |
| E-FMF              | 2.37      | 0.017         | M18a               | 2.40      | 0.026         |
| TSa endo           | 2.97      | 0.037         | M19a               | 2.25      | 0.020         |
| TSs endo           | 3.20      | 0.031         | M20                | 2.29      | 0.016         |
| BPRa               | 2.50      | 0.016         | M21                | 2.28      | 0.017         |
| BPRs               | 2.53      | 0.018         | P5                 | 2.37      | 0.016         |
| TS direct H-abs    | 0.07      | 0.048         | TS FMF N-inversion | 2.43      | 0.017         |

**Table S10** Percentage triples (T) contribution to the total atomization energy  $\%TAE[(T)]$  and T1 diagnostics from ROHF-ROCCSD(T)-F12a/cc-pVDZ-F12 calculations.

| Species            | $\%TAE[(T)]$ | T1 diagnostic | Species | $\%TAE[(T)]$ | T1 diagnostic |
|--------------------|--------------|---------------|---------|--------------|---------------|
| E2-RO <sub>2</sub> | 2.57         | 0.023         | TS34z   | 2.99         | 0.027         |
| E4-RO <sub>2</sub> | 2.57         | 0.023         | TS35    | 0.07         | 0.037         |
| Z2-RO <sub>2</sub> | 2.62         | 0.024         | TS36    | 2.67         | 0.024         |
| Z4-RO <sub>2</sub> | 2.64         | 0.025         | TS37    | 2.69         | 0.024         |
| TS25               | 3.18         | 0.027         | PC29e   | 2.64         | 0.024         |
| TS26               | 3.06         | 0.025         | PC29z   | 2.60         | 0.024         |
| TS27               | 3.10         | 0.027         | PC30e   | 2.72         | 0.024         |
| TS28               | 3.12         | 0.027         | PC30z   | 2.73         | 0.024         |
| TS29e              | 2.94         | 0.025         | PC31    | 2.61         | 0.024         |
| TS29z              | 2.91         | 0.024         | PC32    | 2.66         | 0.024         |
| TS30e              | 3.05         | 0.027         | PC33    | 2.58         | 0.024         |
| TS30z              | 3.00         | 0.022         | PC34e   | 2.66         | 0.024         |
| TS31               | 2.94         | 0.024         | PC34z   | 2.64         | 0.023         |
| TS32               | 2.88         | 0.026         | M22     | 2.60         | 0.019         |
| TS33               | 2.91         | 0.024         | EE-P5   | 2.42         | 0.017         |
| TS34e              | 2.96         | 0.027         | ZZ-P5   | 2.50         | 0.018         |

## S10 ROCCSD(T)-F12a/cc-pVTZ-F12 and UCCSD(T)-F12a/cc-pVDZ-F12 single-point energies

**Table S11** Zero-point corrected energies for first-generation RO<sub>2</sub> and most important transition states calculated at the ROHF-ROCCSD(T)-F12a/cc-pVnZ-F12 (n = D or T) level, and at the ROHF-UCCSD(T)-F12a/cc-pVDZ-F12 level, relative to the entrance channel (5-OH + O<sub>2</sub>), given in kcal mol<sup>-1</sup>.

| Species               | $E_{RO,VDZ}$ | $E_{RO,VTZ}$ | $E_{U,VDZ}$ | $E_{RO,VDZ} - E_{RO,VTZ}$ | $E_{RO,VDZ} - E_{U,VDZ}$ |
|-----------------------|--------------|--------------|-------------|---------------------------|--------------------------|
| 5-OH + O <sub>2</sub> | 0.00         | 0.00         | 0.00        | 0.00                      | 0.00                     |
| 2a-RO <sub>2</sub>    | -16.74       | -17.09       | -16.34      | 0.35                      | -0.40                    |
| 2s-RO <sub>2</sub>    | -17.92       | -18.29       | -17.55      | 0.37                      | -0.37                    |
| 4a-RO <sub>2</sub>    | -20.74       | -21.19       | -20.35      | 0.45                      | -0.39                    |
| 4s-RO <sub>2</sub>    | -20.40       | -20.88       | -20.09      | 0.48                      | -0.31                    |
| TS4a                  | -6.70        | -6.97        | -6.08       | 0.27                      | -0.62                    |
| TS4s                  | -6.02        | -6.19        | -5.77       | 0.17                      | -0.25                    |
| TS5a                  | 0.83         | 0.83         | 1.51        | 0.00                      | -0.68                    |
| TS5s                  | 1.25         | 0.99         | 1.68        | 0.26                      | -0.43                    |
| TS6a                  | 3.56         | 3.13         | 4.02        | 0.43                      | -0.46                    |
| TS7s                  | 0.08         | -0.19        | -2.12       | 0.27                      | +2.20                    |

## S11 Electronic energies, zero-point vibrational energies and partition functions

**Table S12** Electronic energies ( $E_{e,DFT}$ ), zero-point vibrational energies ( $E_{zpv}$ ) and total molecular partition functions ( $Q_{tot}(v=0)$ ) calculated at the  $\omega$ B97XD/aug-cc-pVTZ level of theory, under the Harmonic-Oscillator-Rigid-Rotor approximation, at 1 atm and 298 K. Single-point electronic energies ( $E_{e,CC}$ ) calculated at the ROHF-ROCCSD(T)-F12a/cc-pVDZ-F12// $\omega$ B97XD/aug-cc-pVTZ level of theory. Energy values given in Hartrees (Eh).

| Species            | $E_{e,DFT}$ (Eh) | $E_{e,CC}$ (Eh)   | $E_{zpv}$ (Eh) | $Q_{tot}(v=0)$            |
|--------------------|------------------|-------------------|----------------|---------------------------|
| imidazole          | -226.223232548   | -225.909573732973 | 0.072020       | $0.115658 \times 10^{13}$ |
| OH                 | -75.7407450132   | -75.662876938771  | 0.008608       | $0.604563 \times 10^{08}$ |
| O <sub>2</sub>     | -150.334299668   | -150.175421936388 | 0.003882       | $0.150051 \times 10^{10}$ |
| HO <sub>2</sub>    | -150.921000002   | -150.761615558093 | 0.014547       | $0.153865 \times 10^{11}$ |
| NO                 | -129.897115420   | -129.757653213855 | 0.004610       | $0.154202 \times 10^{10}$ |
| NO <sub>2</sub>    | -205.088487163   | -204.867212142322 | 0.009049       | $0.536679 \times 10^{11}$ |
| 5-OH               | -302.009885037   | -301.615111502248 | 0.085350       | $0.344644 \times 10^{14}$ |
| 2a-RO <sub>2</sub> | -452.368386456   | -451.823730526359 | 0.095747       | $0.621312 \times 10^{15}$ |
| 2s-RO <sub>2</sub> | -452.370845889   | -451.825952717879 | 0.096091       | $0.373118 \times 10^{15}$ |
| 4a-RO <sub>2</sub> | -452.377296150   | -451.830135808682 | 0.095790       | $0.795759 \times 10^{15}$ |
| 4s-RO <sub>2</sub> | -452.377508888   | -451.830346775931 | 0.096537       | $0.488441 \times 10^{15}$ |
| TS4a               | -452.347489533   | -451.805636689923 | 0.093659       | $0.380877 \times 10^{15}$ |
| TS4s               | -452.348297654   | -451.803692857243 | 0.092790       | $0.724947 \times 10^{15}$ |
| TS5a               | -452.334513625   | -451.789135158380 | 0.089551       | $0.114173 \times 10^{16}$ |
| TS5s               | -452.334557947   | -451.789139655172 | 0.089823       | $0.895742 \times 10^{15}$ |
| TS6a               | -452.334865790   | -451.785358677512 | 0.089726       | $0.825654 \times 10^{15}$ |
| TS7s               | -452.344319753   | -451.791379592525 | 0.090203       | $0.189395 \times 10^{15}$ |
| TS8s               | -452.349406190   | -451.800630359954 | 0.092456       | $0.106208 \times 10^{16}$ |
| PC5a               | -452.353125363   | -451.810229347024 | 0.092407       | $0.456404 \times 10^{17}$ |
| PC5s               | -452.361416900   | -451.817776551819 | 0.093334       | $0.466762 \times 10^{16}$ |
| PC6a               | -452.393146268   | -451.842819427856 | 0.093499       | $0.318203 \times 10^{17}$ |
| M7s                | -452.351258488   | -451.803187846204 | 0.093536       | $0.103330 \times 10^{16}$ |
| M8s                | -452.372682172   | -451.821408603242 | 0.091292       | $0.231958 \times 10^{17}$ |
| 4H-4ol             | -301.414627674   | -301.031665629080 | 0.075237       | $0.969329 \times 10^{13}$ |
| 5-ol               | -301.449592827   | -301.059273568953 | 0.076222       | $0.828035 \times 10^{13}$ |
| Z-FMF              | -376.688321974   | -376.222362532819 | 0.079091       | $0.232849 \times 10^{15}$ |
| E-FMF              | -376.688049803   | -376.221293929702 | 0.078588       | $0.314788 \times 10^{15}$ |
| TSa endo           | -452.320250408   | -451.772408911549 | 0.093809       | $0.129351 \times 10^{15}$ |
| TSs endo           | -452.319409182   | -451.775381038013 | 0.093684       | $0.123243 \times 10^{15}$ |
| BPRa               | -452.346580652   | -451.805565003876 | 0.096517       | $0.133966 \times 10^{15}$ |
| BPRs               | -452.347525638   | -451.806584638995 | 0.096856       | $0.102670 \times 10^{15}$ |
| TS FMF N-inversion | -376.668195372   | -376.197014271671 | 0.077608       | $0.306067 \times 10^{15}$ |
| TS direct H-abs    | -452.326806925   | -451.774108431936 | 0.088631       | $0.341259 \times 10^{16}$ |

**Table S13** Electronic energies ( $E_{e,DFT}$ ), zero-point vibrational energies ( $E_{zpv}$ ) and total molecular partition functions ( $Q_{tot}(v=0)$ ) calculated at the  $\omega$ B97XD/aug-cc-pVTZ level of theory, under the Harmonic-Oscillator-Rigid-Rotor approximation, at 1 atm and 298 K. Single-point electronic energies ( $E_{e,CC}$ ) calculated at the ROHF-ROCCSD(T)-F12a/cc-pVDZ-F12// $\omega$ B97XD/aug-cc-pVTZ level of theory. Energy values given in Hartrees (Eh).

| Species  | $E_{e,DFT}$ (Eh) | $E_{e,CC}$ (Eh)   | $E_{zpv}$ (Eh) | $Q_{tot}(v=0)$            |
|----------|------------------|-------------------|----------------|---------------------------|
| 4a-ROONO | -582.309869202   | -581.630508181587 | 0.104068       | $0.176546 \times 10^{17}$ |
| 4s-ROONO | -582.309660324   | -581.630942272112 | 0.104618       | $0.117275 \times 10^{17}$ |
| 4a-RO    | -377.208002981   | -376.736932413013 | 0.089940       | $0.214019 \times 10^{15}$ |
| 4s-RO    | -377.207865120   | -376.737984500920 | 0.090036       | $0.142245 \times 10^{15}$ |
| TS12a    | -377.203040668   | -376.729464082689 | 0.088578       | $0.184008 \times 10^{15}$ |
| TS12s    | -377.202441750   | -376.728350746805 | 0.088410       | $0.152445 \times 10^{15}$ |
| TS13a    | -377.189129205   | -376.719635234914 | 0.087886       | $0.157020 \times 10^{15}$ |
| TS13s    | -377.194283971   | -376.724660566323 | 0.088458       | $0.995138 \times 10^{14}$ |
| TS14a    | -377.170587462   | -376.704004342929 | 0.082543       | $0.132117 \times 10^{15}$ |
| TS14s    | -377.171685735   | -376.705594337650 | 0.082150       | $0.208349 \times 10^{15}$ |
| TS15a    | -377.219036757   | -376.744836923211 | 0.087305       | $0.639515 \times 10^{15}$ |
| TS16a    | -377.212996415   | -376.740819865154 | 0.088810       | $0.104282 \times 10^{15}$ |
| TS16s    | -377.220509506   | -376.748526131318 | 0.089475       | $0.750997 \times 10^{14}$ |
| TS17a    | -377.213160441   | -376.735459333007 | 0.087611       | $0.864943 \times 10^{15}$ |
| TS17s    | -377.233217246   | -376.755119226473 | 0.087593       | $0.436610 \times 10^{15}$ |
| TS18a    | -377.221313169   | -376.747579583709 | 0.086731       | $0.273204 \times 10^{16}$ |
| TS19a    | -377.244261834   | -376.769046804001 | 0.085790       | $0.203250 \times 10^{15}$ |
| TS20     | -377.183935435   | -376.714061393842 | 0.084086       | $0.275396 \times 10^{15}$ |
| TS21     | -377.186226954   | -376.715849544618 | 0.083475       | $0.542227 \times 10^{15}$ |
| M12a     | -377.226880983   | -376.752074460066 | 0.088841       | $0.735335 \times 10^{15}$ |
| M12s     | -377.253059629   | -376.776427311038 | 0.089813       | $0.594836 \times 10^{15}$ |
| M13      | -377.213713056   | -376.746040086351 | 0.087816       | $0.106335 \times 10^{16}$ |
| M16a     | -377.244483090   | -376.774592992347 | 0.091163       | $0.840861 \times 10^{14}$ |
| M16s     | -377.228476298   | -376.758325227930 | 0.091336       | $0.103363 \times 10^{15}$ |
| M17a     | -377.233342825   | -376.759180261072 | 0.088566       | $0.176654 \times 10^{16}$ |
| M17s     | -377.249727877   | -376.773958088501 | 0.088204       | $0.210359 \times 10^{16}$ |
| M18a     | -377.245036268   | -376.768759973816 | 0.088957       | $0.401353 \times 10^{15}$ |
| M19a     | -377.271567034   | -376.794695502791 | 0.089504       | $0.845576 \times 10^{15}$ |
| M20      | -377.247844505   | -376.773489403080 | 0.090177       | $0.572888 \times 10^{15}$ |
| M21      | -377.217283181   | -376.749489319278 | 0.088777       | $0.229191 \times 10^{16}$ |
| P5       | -376.684096138   | -376.218863008304 | 0.080590       | $0.618520 \times 10^{14}$ |



**Table S14** Electronic energies ( $E_{e,DFT}$ ), zero-point vibrational energies ( $E_{zpv}$ ) and total molecular partition functions ( $Q_{tot}(v=0)$ ) calculated at the  $\omega$ B97XD/aug-cc-pVTZ level of theory, under the Harmonic-Oscillator-Rigid-Rotor approximation, at 1 atm and 298 K. Single-point electronic energies ( $E_{e,CC}$ ) calculated at the ROHF-ROCCSD(T)-F12a/cc-pVDZ-F12// $\omega$ B97XD/aug-cc-pVTZ level of theory. Energy values given in Hartrees (Eh).

| Species            | $E_{e,DFT}$ (Eh) | $E_{e,CC}$ (Eh)   | $E_{zpv}$ (Eh) | $Q_{tot}(v=0)$            |
|--------------------|------------------|-------------------|----------------|---------------------------|
| E2-RO <sub>2</sub> | -527.625759726   | -527.000779361207 | 0.098437       | $0.301463 \times 10^{17}$ |
| E4-RO <sub>2</sub> | -527.627061510   | -527.002170163868 | 0.098777       | $0.349290 \times 10^{17}$ |
| Z2-RO <sub>2</sub> | -527.623772267   | -526.999269767715 | 0.099005       | $0.158249 \times 10^{17}$ |
| Z4-RO <sub>2</sub> | -527.626326014   | -527.001391876376 | 0.099276       | $0.127063 \times 10^{17}$ |
| TS25               | -527.592727659   | -526.970258733304 | 0.097063       | $0.732149 \times 10^{16}$ |
| TS26               | -527.609169450   | -526.984814046279 | 0.097591       | $0.736032 \times 10^{16}$ |
| TS27               | -527.600554018   | -526.977259787046 | 0.097165       | $0.763224 \times 10^{16}$ |
| TS28               | -527.597848257   | -526.974692297824 | 0.097336       | $0.961118 \times 10^{16}$ |
| TS29e              | -527.598313169   | -526.969221851031 | 0.093449       | $0.171434 \times 10^{17}$ |
| TS29z              | -527.608023646   | -526.978882926670 | 0.093260       | $0.162136 \times 10^{17}$ |
| TS30e              | -527.582875329   | -526.958493290871 | 0.093207       | $0.143605 \times 10^{17}$ |
| TS30z              | -527.589268732   | -526.961798908208 | 0.093075       | $0.261475 \times 10^{17}$ |
| TS31               | -527.604743481   | -526.979947930682 | 0.093914       | $0.234325 \times 10^{17}$ |
| TS32               | -527.593048646   | -526.964109722016 | 0.092516       | $0.226368 \times 10^{17}$ |
| TS33               | -527.607317493   | -526.981714878582 | 0.093444       | $0.254571 \times 10^{17}$ |
| TS34e              | -527.584988467   | -526.957851720314 | 0.092327       | $0.398007 \times 10^{17}$ |
| TS34z              | -527.583461835   | -526.957309536309 | 0.092287       | $0.603376 \times 10^{17}$ |
| TS35               | -527.594320693   | -526.963354326633 | 0.095336       | $0.568073 \times 10^{16}$ |
| TS36               | -527.590935465   | -526.961497524727 | 0.096550       | $0.358348 \times 10^{17}$ |
| TS37               | -527.594077648   | -526.964277383705 | 0.096847       | $0.715411 \times 10^{17}$ |
| PC29e              | -527.618698464   | -526.992587986847 | 0.096173       | $0.510286 \times 10^{18}$ |
| PC29z              | -527.628656450   | -527.001282631543 | 0.096119       | $0.589012 \times 10^{18}$ |
| PC30e              | -527.597498337   | -526.973654189782 | 0.095572       | $0.841129 \times 10^{18}$ |
| PC30z              | -527.602206243   | -526.976472272938 | 0.095935       | $0.189480 \times 10^{18}$ |
| PC31               | -527.623347869   | -526.997944097581 | 0.096183       | $0.155801 \times 10^{19}$ |
| PC32               | -527.603951947   | -526.978578979483 | 0.095783       | $0.439384 \times 10^{18}$ |
| PC33               | -527.624661682   | -526.998299431262 | 0.095784       | $0.173996 \times 10^{19}$ |
| PC34e              | -527.603951943   | -526.978578482214 | 0.095788       | $0.436733 \times 10^{18}$ |
| PC34z              | -527.599119255   | -526.975529318668 | 0.095204       | $0.226133 \times 10^{19}$ |
| M22                | -527.598492294   | -526.976026780244 | 0.096521       | $0.122082 \times 10^{18}$ |
| EE-P5              | -376.664094946   | -376.199558479277 | 0.078473       | $0.317189 \times 10^{15}$ |
| ZZ-P5              | -376.664706774   | -376.198731679595 | 0.079028       | $0.126421 \times 10^{15}$ |

## S12 Cartesian coordinates, vibrational wavenumbers and rotational constants

Cartesian coordinates correspond to the structures of lowest-free energy conformers, optimized at the  $\omega$ B97XD/aug-cc-pVTZ level of theory.<sup>3-5</sup>

| imidazole                                    |          |          |          |        |          |          |        |
|----------------------------------------------|----------|----------|----------|--------|----------|----------|--------|
| Cartesian Coordinates ( $\text{\AA}$ )       |          |          |          |        |          |          |        |
| N                                            | 0.73933  | 0.81175  | -0.00006 |        |          |          |        |
| C                                            | 0.99086  | -0.52109 | 0.00005  |        |          |          |        |
| N                                            | -0.11185 | -1.21990 | -0.00000 |        |          |          |        |
| C                                            | -1.12695 | -0.29772 | -0.00004 |        |          |          |        |
| C                                            | -0.62292 | 0.96780  | 0.00006  |        |          |          |        |
| H                                            | 1.99188  | -0.91951 | 0.00006  |        |          |          |        |
| H                                            | -2.16068 | -0.59773 | -0.00007 |        |          |          |        |
| H                                            | -1.09161 | 1.93477  | 0.00010  |        |          |          |        |
| H                                            | 1.42208  | 1.54560  | -0.00009 |        |          |          |        |
| Vibrational wavenumbers ( $\text{cm}^{-1}$ ) |          |          |          |        |          |          |        |
| 552.6                                        | 653.8    | 688.9    | 758.9    | 850.9  | 904.2    | 913.0    | 952.5  |
| 1088.8                                       | 1110.0   | 1159.6   | 1185.6   | 1296.7 | 1393.2   | 1460.9   | 1528.8 |
| 1584.1                                       | 3261.9   | 3264.4   | 3295.3   | 3708.8 |          |          |        |
| Rotational Constants (GHz):                  |          |          |          | 9.8462 | 9.5198   | 4.8401   |        |
| OH                                           |          |          |          |        |          |          |        |
| Cartesian Coordinates ( $\text{\AA}$ )       |          |          |          |        |          |          |        |
| H                                            | 0.00000  | 0.00000  | -0.86236 |        |          |          |        |
| O                                            | 0.00000  | 0.00000  | 0.10780  |        |          |          |        |
| Vibrational wavenumbers ( $\text{cm}^{-1}$ ) |          |          |          |        |          |          |        |
| 3778.6                                       |          |          |          |        |          |          |        |
| Rotational Constants (GHz):                  |          |          |          | 0.0000 | 566.3471 | 566.3471 |        |
| O <sub>2</sub>                               |          |          |          |        |          |          |        |
| Cartesian Coordinates ( $\text{\AA}$ )       |          |          |          |        |          |          |        |
| O                                            | 0.00000  | 0.00000  | 0.59800  |        |          |          |        |
| O                                            | 0.00000  | 0.00000  | -0.59800 |        |          |          |        |
| Vibrational wavenumbers ( $\text{cm}^{-1}$ ) |          |          |          |        |          |          |        |
| 1704.0                                       |          |          |          |        |          |          |        |
| Rotational Constants (GHz):                  |          |          |          | 0.0000 | 44.1780  | 44.1780  |        |

| HO <sub>2</sub>                             |          |          |          |          |         |         |        |
|---------------------------------------------|----------|----------|----------|----------|---------|---------|--------|
| Cartesian Coordinates (Å)                   |          |          |          |          |         |         |        |
| O                                           | 0.05500  | 0.70984  | 0.00000  |          |         |         |        |
| O                                           | 0.05500  | -0.60202 | 0.00000  |          |         |         |        |
| H                                           | -0.87996 | -0.86254 | 0.00000  |          |         |         |        |
| Vibrational wavenumbers (cm <sup>-1</sup> ) |          |          |          |          |         |         |        |
| 1237.2                                      | 1463.4   | 3685.0   |          |          |         |         |        |
| Rotational Constants (GHz):                 |          |          |          | 629.1948 | 34.5325 | 32.7359 |        |
| NO                                          |          |          |          |          |         |         |        |
| Cartesian Coordinates (Å)                   |          |          |          |          |         |         |        |
| N                                           | 0.00000  | 0.00000  | -0.60826 |          |         |         |        |
| O                                           | 0.00000  | 0.00000  | 0.53223  |          |         |         |        |
| Vibrational wavenumbers (cm <sup>-1</sup> ) |          |          |          |          |         |         |        |
| 2023.6                                      |          |          |          |          |         |         |        |
| Rotational Constants (GHz):                 |          |          |          | 0.0000   | 52.0379 | 52.0379 |        |
| NO <sub>2</sub>                             |          |          |          |          |         |         |        |
| Cartesian Coordinates (Å)                   |          |          |          |          |         |         |        |
| N                                           | -0.00000 | -0.00000 | 0.31848  |          |         |         |        |
| O                                           | -0.00000 | 1.09171  | -0.13933 |          |         |         |        |
| O                                           | -0.00000 | -1.09171 | -0.13933 |          |         |         |        |
| Vibrational wavenumbers (cm <sup>-1</sup> ) |          |          |          |          |         |         |        |
| 780.7                                       | 1437.7   | 1753.8   |          |          |         |         |        |
| Rotational Constants (GHz):                 |          |          |          | 247.5663 | 13.2553 | 12.5817 |        |
| 5-OH                                        |          |          |          |          |         |         |        |
| Cartesian Coordinates (Å)                   |          |          |          |          |         |         |        |
| N                                           | 0.02738  | 0.00315  | 0.03707  |          |         |         |        |
| C                                           | -0.37942 | -0.63575 | 1.16624  |          |         |         |        |
| N                                           | 0.61759  | -1.14301 | 1.86601  |          |         |         |        |
| C                                           | 1.73965  | -0.82046 | 1.21123  |          |         |         |        |
| C                                           | 1.47590  | 0.04086  | 0.00797  |          |         |         |        |
| H                                           | -1.41885 | -0.71797 | 1.44008  |          |         |         |        |
| H                                           | 1.86818  | -0.35140 | -0.93288 |          |         |         |        |
| H                                           | -0.55221 | 0.56245  | -0.55859 |          |         |         |        |
| H                                           | 1.90318  | 1.66969  | 0.97897  |          |         |         |        |
| O                                           | 2.01326  | 1.35216  | 0.07915  |          |         |         |        |
| H                                           | 2.71854  | -1.12175 | 1.54701  |          |         |         |        |
| Vibrational wavenumbers (cm <sup>-1</sup> ) |          |          |          |          |         |         |        |
| 115.9                                       | 297.1    | 333.9    | 423.1    | 538.4    | 598.8   | 630.9   | 789.4  |
| 823.9                                       | 894.1    | 933.4    | 1029.9   | 1047.4   | 1122.4  | 1186.7  | 1235.5 |
| 1258.6                                      | 1309.1   | 1334.3   | 1422.3   | 1477.0   | 1534.2  | 3058.5  | 3246.7 |
| 3255.8                                      | 3712.9   | 3854.0   |          |          |         |         |        |
| Rotational Constants (GHz):                 |          |          |          | 7.6341   | 3.7595  | 2.8521  |        |

| <b>2a-RO<sub>2</sub></b>                    |          |          |          |        |        |        |        |
|---------------------------------------------|----------|----------|----------|--------|--------|--------|--------|
| Cartesian Coordinates (Å)                   |          |          |          |        |        |        |        |
| N                                           | -0.02068 | 0.21149  | 0.22042  |        |        |        |        |
| C                                           | -0.47463 | -0.45964 | 1.38663  |        |        |        |        |
| N                                           | 0.69522  | -0.79225 | 2.16920  |        |        |        |        |
| C                                           | 1.69498  | -0.63427 | 1.41121  |        |        |        |        |
| C                                           | 1.38245  | -0.07733 | 0.03850  |        |        |        |        |
| H                                           | 2.70622  | -0.84747 | 1.73717  |        |        |        |        |
| H                                           | 1.58599  | -0.81470 | -0.74056 |        |        |        |        |
| H                                           | -0.60932 | 0.13048  | -0.59196 |        |        |        |        |
| H                                           | 1.84125  | 1.77941  | 0.24849  |        |        |        |        |
| O                                           | 2.14187  | 1.05035  | -0.29994 |        |        |        |        |
| H                                           | -1.22626 | 0.07689  | 1.96105  |        |        |        |        |
| O                                           | -1.19826 | -1.72355 | 1.08374  |        |        |        |        |
| O                                           | -0.52970 | -2.48122 | 0.27228  |        |        |        |        |
| Vibrational wavenumbers (cm <sup>-1</sup> ) |          |          |          |        |        |        |        |
| 108.7                                       | 124.7    | 210.0    | 288.1    | 368.7  | 418.9  | 427.6  | 544.2  |
| 591.0                                       | 711.5    | 796.7    | 831.8    | 873.0  | 933.7  | 985.1  | 1038.6 |
| 1065.5                                      | 1140.7   | 1162.2   | 1226.7   | 1277.5 | 1292.5 | 1326.0 | 1377.1 |
| 1385.8                                      | 1428.8   | 1451.1   | 1728.5   | 3078.6 | 3133.3 | 3195.2 | 3645.6 |
| 3860.8                                      |          |          |          |        |        |        |        |
| Rotational Constants (GHz):                 |          |          |          | 4.3663 | 1.6376 | 1.5174 |        |

| <b>2s-RO<sub>2</sub></b>                    |          |          |          |        |        |        |        |
|---------------------------------------------|----------|----------|----------|--------|--------|--------|--------|
| Cartesian Coordinates (Å)                   |          |          |          |        |        |        |        |
| N                                           | 0.00305  | 0.01028  | 0.00595  |        |        |        |        |
| C                                           | -0.45831 | -0.25049 | 1.31137  |        |        |        |        |
| N                                           | 0.63465  | -0.86708 | 2.03053  |        |        |        |        |
| C                                           | 1.66652  | -0.73497 | 1.30978  |        |        |        |        |
| C                                           | 1.44668  | 0.00262  | 0.00369  |        |        |        |        |
| H                                           | -1.37867 | -0.82706 | 1.36513  |        |        |        |        |
| H                                           | 2.64237  | -1.07268 | 1.63742  |        |        |        |        |
| H                                           | 1.84264  | -0.52699 | -0.86211 |        |        |        |        |
| H                                           | -0.46800 | 0.70268  | -0.55000 |        |        |        |        |
| H                                           | 1.68922  | 1.75936  | 0.73096  |        |        |        |        |
| O                                           | 2.07144  | 1.25691  | 0.00013  |        |        |        |        |
| O                                           | -0.86331 | 0.97337  | 2.08272  |        |        |        |        |
| O                                           | 0.03212  | 1.90542  | 2.05153  |        |        |        |        |
| Vibrational wavenumbers (cm <sup>-1</sup> ) |          |          |          |        |        |        |        |
| 131.9                                       | 158.7    | 216.4    | 320.0    | 376.1  | 429.8  | 486.4  | 564.5  |
| 615.4                                       | 661.6    | 783.2    | 853.6    | 871.7  | 919.6  | 981.4  | 1039.6 |
| 1068.8                                      | 1108.8   | 1160.4   | 1239.6   | 1286.7 | 1309.0 | 1326.7 | 1373.5 |
| 1392.9                                      | 1438.3   | 1466.7   | 1723.1   | 3102.6 | 3136.3 | 3197.8 | 3665.9 |
| 3771.9                                      |          |          |          |        |        |        |        |
| Rotational Constants (GHz):                 |          |          |          | 3.2462 | 2.1914 | 1.7943 |        |

| 4a-RO <sub>2</sub>                          |          |          |          |        |        |        |        |
|---------------------------------------------|----------|----------|----------|--------|--------|--------|--------|
| Cartesian Coordinates (Å)                   |          |          |          |        |        |        |        |
| N                                           | 0.00716  | -0.01854 | -0.00679 |        |        |        |        |
| C                                           | -0.41455 | -0.73935 | 1.07738  |        |        |        |        |
| N                                           | 0.47686  | -1.15404 | 1.89054  |        |        |        |        |
| C                                           | 1.74102  | -0.81527 | 1.29160  |        |        |        |        |
| C                                           | 1.45405  | -0.00335 | -0.00192 |        |        |        |        |
| H                                           | -1.47435 | -0.89743 | 1.23423  |        |        |        |        |
| H                                           | 1.87194  | -0.49941 | -0.87546 |        |        |        |        |
| H                                           | -0.51986 | 0.01528  | -0.86037 |        |        |        |        |
| H                                           | 1.52654  | 1.80878  | 0.66637  |        |        |        |        |
| O                                           | 1.98690  | 1.28825  | 0.00418  |        |        |        |        |
| H                                           | 2.39480  | -0.26957 | 1.97023  |        |        |        |        |
| O                                           | 2.50469  | -2.01845 | 1.00860  |        |        |        |        |
| O                                           | 1.91915  | -2.76027 | 0.11485  |        |        |        |        |
| Vibrational wavenumbers (cm <sup>-1</sup> ) |          |          |          |        |        |        |        |
| 82.3                                        | 134.8    | 222.7    | 283.6    | 345.0  | 381.2  | 425.4  | 487.6  |
| 569.5                                       | 683.9    | 777.6    | 881.2    | 936.8  | 978.0  | 994.1  | 1066.7 |
| 1073.9                                      | 1132.3   | 1153.9   | 1217.1   | 1263.5 | 1293.4 | 1314.4 | 1358.4 |
| 1395.1                                      | 1434.6   | 1468.2   | 1690.4   | 3118.9 | 3125.4 | 3206.0 | 3682.3 |
| 3868.9                                      |          |          |          |        |        |        |        |
| Rotational Constants (GHz):                 |          |          |          | 3.0972 | 2.0725 | 1.6072 |        |

| 4s-RO <sub>2</sub>                          |          |          |          |        |        |        |        |
|---------------------------------------------|----------|----------|----------|--------|--------|--------|--------|
| Cartesian Coordinates (Å)                   |          |          |          |        |        |        |        |
| N                                           | 0.08681  | -0.15602 | -0.11014 |        |        |        |        |
| C                                           | -0.33055 | -0.56922 | 1.12567  |        |        |        |        |
| N                                           | 0.55571  | -1.02350 | 1.92200  |        |        |        |        |
| C                                           | 1.80556  | -0.92358 | 1.21549  |        |        |        |        |
| C                                           | 1.54422  | -0.07661 | -0.08441 |        |        |        |        |
| H                                           | -1.38204 | -0.52894 | 1.38029  |        |        |        |        |
| H                                           | 2.19658  | -1.90939 | 0.96636  |        |        |        |        |
| H                                           | 1.96985  | -0.55925 | -0.96032 |        |        |        |        |
| H                                           | -0.42450 | 0.54309  | -0.62150 |        |        |        |        |
| H                                           | 1.95972  | 1.57783  | 0.81188  |        |        |        |        |
| O                                           | 2.02072  | 1.22491  | -0.08414 |        |        |        |        |
| O                                           | 2.84602  | -0.37905 | 2.05014  |        |        |        |        |
| O                                           | 2.53434  | 0.79273  | 2.52771  |        |        |        |        |
| Vibrational wavenumbers (cm <sup>-1</sup> ) |          |          |          |        |        |        |        |
| 69.2                                        | 187.4    | 266.8    | 319.2    | 380.5  | 466.5  | 504.5  | 537.8  |
| 595.4                                       | 682.6    | 802.1    | 880.8    | 894.0  | 988.3  | 999.2  | 1044.7 |
| 1087.4                                      | 1120.5   | 1177.5   | 1221.5   | 1266.3 | 1298.4 | 1338.6 | 1359.5 |
| 1390.1                                      | 1453.2   | 1476.7   | 1695.4   | 3105.8 | 3129.9 | 3208.8 | 3656.6 |
| 3769.8                                      |          |          |          |        |        |        |        |
| Rotational Constants (GHz):                 |          |          |          | 3.2829 | 2.2757 | 1.6586 |        |

| TS4a                                        |          |          |          |        |        |        |        |
|---------------------------------------------|----------|----------|----------|--------|--------|--------|--------|
| Cartesian Coordinates (Å)                   |          |          |          |        |        |        |        |
| N                                           | 0.03012  | -0.00986 | -0.01901 |        |        |        |        |
| C                                           | -0.36900 | -0.78134 | 1.02354  |        |        |        |        |
| N                                           | 0.61075  | -1.02253 | 1.91118  |        |        |        |        |
| C                                           | 1.70738  | -0.81894 | 1.22551  |        |        |        |        |
| C                                           | 1.48378  | 0.02322  | -0.01891 |        |        |        |        |
| H                                           | 2.69040  | -0.99606 | 1.63724  |        |        |        |        |
| H                                           | 1.90925  | -0.41632 | -0.91780 |        |        |        |        |
| H                                           | -0.50623 | 0.07419  | -0.86274 |        |        |        |        |
| H                                           | 1.65640  | 1.75459  | 0.83113  |        |        |        |        |
| O                                           | 2.01227  | 1.31912  | 0.05278  |        |        |        |        |
| H                                           | -1.41387 | -0.92885 | 1.24635  |        |        |        |        |
| O                                           | 0.02451  | -2.67914 | 0.13676  |        |        |        |        |
| O                                           | 1.26135  | -2.63306 | 0.01262  |        |        |        |        |
| Vibrational wavenumbers (cm <sup>-1</sup> ) |          |          |          |        |        |        |        |
| 206.9 <i>i</i>                              | 146.2    | 182.9    | 222.6    | 282.9  | 344.0  | 372.3  | 469.0  |
| 511.1                                       | 605.2    | 624.7    | 840.7    | 874.0  | 917.8  | 939.9  | 954.5  |
| 1041.0                                      | 1107.6   | 1157.9   | 1196.1   | 1268.5 | 1290.5 | 1304.9 | 1373.5 |
| 1436.7                                      | 1452.1   | 1478.2   | 1547.6   | 3126.3 | 3231.7 | 3255.3 | 3691.8 |
| 3863.9                                      |          |          |          |        |        |        |        |
| Rotational Constants (GHz):                 |          |          |          | 3.9116 | 1.7861 | 1.6896 |        |

| TS4s                                        |          |          |          |        |        |        |        |
|---------------------------------------------|----------|----------|----------|--------|--------|--------|--------|
| Cartesian Coordinates (Å)                   |          |          |          |        |        |        |        |
| N                                           | 0.36343  | 0.30736  | 0.15499  |        |        |        |        |
| C                                           | -0.04799 | -0.43402 | 1.18699  |        |        |        |        |
| N                                           | 0.79938  | -1.40341 | 1.53421  |        |        |        |        |
| C                                           | 1.91240  | -1.13220 | 0.88216  |        |        |        |        |
| C                                           | 1.71821  | -0.10372 | -0.21492 |        |        |        |        |
| H                                           | -1.02767 | -0.31889 | 1.62322  |        |        |        |        |
| H                                           | 2.79215  | -1.75282 | 0.95756  |        |        |        |        |
| H                                           | 1.70670  | -0.57532 | -1.20328 |        |        |        |        |
| H                                           | -0.11644 | 1.09409  | -0.23846 |        |        |        |        |
| H                                           | 2.83011  | 1.21728  | 0.59277  |        |        |        |        |
| O                                           | 2.63664  | 0.92904  | -0.30650 |        |        |        |        |
| O                                           | 2.40148  | 0.50599  | 2.41082  |        |        |        |        |
| O                                           | 1.28194  | 0.75975  | 2.88299  |        |        |        |        |
| Vibrational wavenumbers (cm <sup>-1</sup> ) |          |          |          |        |        |        |        |
| 136.3 <i>i</i>                              | 84.3     | 142.7    | 219.3    | 253.1  | 340.8  | 406.8  | 427.9  |
| 565.6                                       | 569.0    | 593.8    | 769.4    | 875.2  | 890.5  | 915.0  | 927.4  |
| 1060.8                                      | 1110.2   | 1182.7   | 1204.5   | 1254.9 | 1289.2 | 1308.2 | 1363.1 |
| 1438.1                                      | 1445.6   | 1496.8   | 1555.5   | 3034.0 | 3241.2 | 3258.4 | 3713.0 |
| 3792.9                                      |          |          |          |        |        |        |        |
| Rotational Constants (GHz):                 |          |          |          | 2.7910 | 2.3631 | 1.8121 |        |

| TS5a                                        |          |          |          |        |        |        |        |
|---------------------------------------------|----------|----------|----------|--------|--------|--------|--------|
| Cartesian Coordinates (Å)                   |          |          |          |        |        |        |        |
| N                                           | -0.05254 | 0.05341  | 0.14875  |        |        |        |        |
| C                                           | -0.38356 | -0.93490 | 0.94989  |        |        |        |        |
| N                                           | 0.68876  | -1.55291 | 1.62695  |        |        |        |        |
| C                                           | 1.73089  | -0.97977 | 1.17084  |        |        |        |        |
| C                                           | 1.41061  | 0.05530  | 0.12426  |        |        |        |        |
| H                                           | 2.73126  | -1.22677 | 1.50048  |        |        |        |        |
| H                                           | 1.74241  | -0.30637 | -0.85890 |        |        |        |        |
| H                                           | -0.53201 | -0.27158 | -0.90139 |        |        |        |        |
| H                                           | 1.72116  | 1.93218  | -0.19866 |        |        |        |        |
| O                                           | 1.99058  | 1.27826  | 0.44826  |        |        |        |        |
| H                                           | -1.39788 | -1.14257 | 1.24679  |        |        |        |        |
| O                                           | -0.88012 | -1.23962 | -1.69032 |        |        |        |        |
| O                                           | -0.90875 | -2.19783 | -0.84671 |        |        |        |        |
| Vibrational wavenumbers (cm <sup>-1</sup> ) |          |          |          |        |        |        |        |
| 941.8 <i>i</i>                              | 96.3     | 122.3    | 183.7    | 235.9  | 257.5  | 367.7  | 432.3  |
| 587.0                                       | 614.4    | 713.5    | 824.7    | 885.4  | 936.5  | 976.5  | 1005.6 |
| 1039.5                                      | 1089.0   | 1175.8   | 1222.7   | 1267.9 | 1303.1 | 1335.6 | 1349.8 |
| 1417.4                                      | 1438.8   | 1557.3   | 1679.7   | 1807.8 | 3004.2 | 3218.7 | 3268.7 |
| 3893.0                                      |          |          |          |        |        |        |        |
| Rotational Constants (GHz):                 |          |          |          | 3.6416 | 1.6425 | 1.3036 |        |

| TS5s                                        |          |          |          |        |        |        |        |
|---------------------------------------------|----------|----------|----------|--------|--------|--------|--------|
| Cartesian Coordinates (Å)                   |          |          |          |        |        |        |        |
| N                                           | -0.00431 | -0.00558 | -0.05086 |        |        |        |        |
| C                                           | -0.38481 | -0.67266 | 1.01158  |        |        |        |        |
| N                                           | 0.65477  | -1.22060 | 1.79592  |        |        |        |        |
| C                                           | 1.72611  | -0.82212 | 1.23253  |        |        |        |        |
| C                                           | 1.46567  | 0.00243  | -0.00988 |        |        |        |        |
| H                                           | -1.40689 | -0.95556 | 1.19942  |        |        |        |        |
| H                                           | 2.71196  | -1.06810 | 1.60583  |        |        |        |        |
| H                                           | 1.84237  | -0.52456 | -0.89000 |        |        |        |        |
| H                                           | -0.47133 | 1.07888  | 0.07919  |        |        |        |        |
| H                                           | 1.67970  | 1.79570  | 0.68313  |        |        |        |        |
| O                                           | 2.04255  | 1.26539  | -0.03238 |        |        |        |        |
| O                                           | -0.99858 | 1.31083  | 1.98019  |        |        |        |        |
| O                                           | -0.85103 | 2.01349  | 0.92221  |        |        |        |        |
| Vibrational wavenumbers (cm <sup>-1</sup> ) |          |          |          |        |        |        |        |
| 893.6 <i>i</i>                              | 104.3    | 113.7    | 171.0    | 234.4  | 393.8  | 402.6  | 445.3  |
| 542.9                                       | 619.6    | 716.4    | 801.6    | 875.8  | 918.3  | 976.2  | 995.3  |
| 1053.0                                      | 1101.3   | 1162.0   | 1241.3   | 1285.5 | 1303.0 | 1330.2 | 1342.7 |
| 1420.1                                      | 1433.0   | 1558.7   | 1675.1   | 1812.6 | 3073.1 | 3210.7 | 3271.4 |
| 3843.0                                      |          |          |          |        |        |        |        |
| Rotational Constants (GHz):                 |          |          |          | 2.9885 | 2.0548 | 1.4963 |        |

| TS6a                                        |          |          |          |        |        |        |        |
|---------------------------------------------|----------|----------|----------|--------|--------|--------|--------|
| Cartesian Coordinates (Å)                   |          |          |          |        |        |        |        |
| N                                           | 0.02244  | 0.00727  | -0.00093 |        |        |        |        |
| C                                           | -0.35998 | -1.05877 | 0.70133  |        |        |        |        |
| N                                           | 0.63428  | -1.70163 | 1.28455  |        |        |        |        |
| C                                           | 1.75101  | -1.05424 | 0.89653  |        |        |        |        |
| C                                           | 1.45255  | 0.01726  | -0.02005 |        |        |        |        |
| H                                           | -1.39496 | -1.35603 | 0.77580  |        |        |        |        |
| H                                           | 1.81041  | -0.55490 | -1.07852 |        |        |        |        |
| H                                           | -0.56598 | 0.57392  | -0.58348 |        |        |        |        |
| H                                           | 2.52491  | 1.42585  | -0.78220 |        |        |        |        |
| O                                           | 2.06883  | 1.25583  | 0.04260  |        |        |        |        |
| H                                           | 2.70990  | -1.24624 | 1.34424  |        |        |        |        |
| O                                           | 2.61202  | -2.33660 | -0.85294 |        |        |        |        |
| O                                           | 2.39807  | -1.54475 | -1.81506 |        |        |        |        |
| Vibrational wavenumbers (cm <sup>-1</sup> ) |          |          |          |        |        |        |        |
| 723.9 <i>i</i>                              | 110.8    | 140.4    | 211.0    | 266.9  | 285.5  | 359.0  | 409.9  |
| 528.9                                       | 618.9    | 658.0    | 748.3    | 784.5  | 902.6  | 916.9  | 951.9  |
| 1022.5                                      | 1144.1   | 1185.7   | 1192.3   | 1264.2 | 1317.3 | 1328.6 | 1373.9 |
| 1382.0                                      | 1450.7   | 1514.6   | 1568.3   | 1632.0 | 3246.6 | 3281.0 | 3697.8 |
| 3890.0                                      |          |          |          |        |        |        |        |
| Rotational Constants (GHz):                 |          |          |          | 2.6955 | 1.9757 | 1.4655 |        |

| TS7s                                        |          |          |          |        |        |        |        |
|---------------------------------------------|----------|----------|----------|--------|--------|--------|--------|
| Cartesian Coordinates (Å)                   |          |          |          |        |        |        |        |
| N                                           | 1.44292  | -1.37200 | -1.07956 |        |        |        |        |
| C                                           | 0.30882  | -1.12226 | -1.79401 |        |        |        |        |
| N                                           | -0.61760 | -0.45012 | -1.23438 |        |        |        |        |
| C                                           | -0.19464 | -0.09268 | 0.08263  |        |        |        |        |
| C                                           | 1.44335  | -0.51613 | 0.10955  |        |        |        |        |
| H                                           | 0.20767  | -1.51753 | -2.79692 |        |        |        |        |
| H                                           | -0.73828 | -0.63144 | 0.85723  |        |        |        |        |
| H                                           | 1.58386  | -1.09250 | 1.02837  |        |        |        |        |
| H                                           | 2.31807  | -1.47771 | -1.56626 |        |        |        |        |
| H                                           | 1.43053  | 1.49000  | -0.34477 |        |        |        |        |
| O                                           | 2.22241  | 0.54113  | 0.03507  |        |        |        |        |
| O                                           | -0.28584 | 1.23085  | 0.42957  |        |        |        |        |
| O                                           | 0.44971  | 1.99348  | -0.43786 |        |        |        |        |
| Vibrational wavenumbers (cm <sup>-1</sup> ) |          |          |          |        |        |        |        |
| 1420.9 <i>i</i>                             | 98.3     | 242.2    | 395.5    | 431.4  | 477.5  | 512.3  | 591.4  |
| 630.9                                       | 680.4    | 715.1    | 862.1    | 887.3  | 926.4  | 980.3  | 1007.2 |
| 1037.9                                      | 1070.0   | 1137.3   | 1150.7   | 1181.4 | 1214.2 | 1302.8 | 1342.1 |
| 1371.9                                      | 1390.3   | 1443.3   | 1704.5   | 1792.6 | 3046.5 | 3120.3 | 3208.1 |
| 3642.4                                      |          |          |          |        |        |        |        |
| Rotational Constants (GHz):                 |          |          |          | 3.4172 | 2.3497 | 1.7398 |        |



| TS8s                                        |          |          |          |        |        |        |        |
|---------------------------------------------|----------|----------|----------|--------|--------|--------|--------|
| Cartesian Coordinates (Å)                   |          |          |          |        |        |        |        |
| N                                           | -1.60468 | 0.46721  | -0.27073 |        |        |        |        |
| C                                           | -0.71913 | 1.50855  | -0.39769 |        |        |        |        |
| N                                           | 0.43988  | 1.53461  | 0.12141  |        |        |        |        |
| C                                           | 0.85031  | 0.42179  | 0.83354  |        |        |        |        |
| C                                           | -1.25927 | -0.67041 | 0.51232  |        |        |        |        |
| H                                           | -1.05523 | 2.33993  | -1.00722 |        |        |        |        |
| H                                           | 0.95121  | 0.49621  | 1.90999  |        |        |        |        |
| H                                           | -1.30764 | -0.49252 | 1.59046  |        |        |        |        |
| H                                           | -2.15155 | 0.25532  | -1.09190 |        |        |        |        |
| H                                           | 0.93495  | -1.43700 | -0.89833 |        |        |        |        |
| O                                           | -1.19657 | -1.78157 | 0.02705  |        |        |        |        |
| O                                           | 1.83589  | -0.35940 | 0.34390  |        |        |        |        |
| O                                           | 1.55449  | -0.70081 | -1.01430 |        |        |        |        |
| Vibrational wavenumbers (cm <sup>-1</sup> ) |          |          |          |        |        |        |        |
| 110.0 <i>i</i>                              | 64.6     | 130.4    | 226.5    | 301.5  | 372.4  | 398.7  | 431.7  |
| 477.0                                       | 513.5    | 628.4    | 707.3    | 763.3  | 846.9  | 924.2  | 967.5  |
| 992.3                                       | 1063.6   | 1083.1   | 1174.2   | 1215.8 | 1378.7 | 1383.0 | 1427.9 |
| 1450.3                                      | 1458.7   | 1702.4   | 1720.8   | 3059.7 | 3182.2 | 3185.5 | 3615.2 |
| 3736.3                                      |          |          |          |        |        |        |        |
| Rotational Constants (GHz):                 |          |          |          | 2.7809 | 2.1076 | 1.4990 |        |

| PC5a                                        |          |          |          |        |        |        |        |
|---------------------------------------------|----------|----------|----------|--------|--------|--------|--------|
| Cartesian Coordinates (Å)                   |          |          |          |        |        |        |        |
| N                                           | 0.01823  | -0.00876 | -0.10939 |        |        |        |        |
| C                                           | -0.46579 | -0.48122 | 0.96893  |        |        |        |        |
| N                                           | 0.33509  | -0.35132 | 2.14210  |        |        |        |        |
| C                                           | 1.38218  | 0.24712  | 1.73230  |        |        |        |        |
| C                                           | 1.34792  | 0.47725  | 0.24429  |        |        |        |        |
| H                                           | 2.20633  | 0.51234  | 2.38109  |        |        |        |        |
| H                                           | 2.06606  | -0.21587 | -0.22124 |        |        |        |        |
| H                                           | -0.94032 | -0.19610 | -1.57611 |        |        |        |        |
| H                                           | 1.57297  | 1.89197  | -1.04651 |        |        |        |        |
| O                                           | 1.60346  | 1.79886  | -0.09286 |        |        |        |        |
| H                                           | -1.43392 | -0.95956 | 1.02115  |        |        |        |        |
| O                                           | -1.63512 | -0.42953 | -2.24991 |        |        |        |        |
| O                                           | -2.53357 | -1.09383 | -1.56272 |        |        |        |        |
| Vibrational wavenumbers (cm <sup>-1</sup> ) |          |          |          |        |        |        |        |
| 36.9                                        | 55.9     | 63.8     | 126.5    | 196.7  | 262.4  | 277.3  | 371.1  |
| 582.9                                       | 616.5    | 728.3    | 788.8    | 876.5  | 926.7  | 972.9  | 1023.6 |
| 1034.2                                      | 1072.9   | 1190.3   | 1217.4   | 1268.2 | 1292.8 | 1308.7 | 1339.6 |
| 1440.9                                      | 1611.7   | 1633.5   | 1701.9   | 2981.6 | 3214.8 | 3218.3 | 3237.9 |
| 3890.3                                      |          |          |          |        |        |        |        |
| Rotational Constants (GHz):                 |          |          |          | 3.6171 | 1.1297 | 0.8838 |        |

| PC5s                                        |          |          |          |        |        |        |        |
|---------------------------------------------|----------|----------|----------|--------|--------|--------|--------|
| Cartesian Coordinates (Å)                   |          |          |          |        |        |        |        |
| N                                           | -0.54306 | -0.52989 | -0.11552 |        |        |        |        |
| C                                           | -0.54577 | -1.77103 | 0.16031  |        |        |        |        |
| N                                           | 0.71858  | -2.42169 | 0.20381  |        |        |        |        |
| C                                           | 1.55057  | -1.49051 | -0.05965 |        |        |        |        |
| C                                           | 0.86058  | -0.19112 | -0.36535 |        |        |        |        |
| H                                           | -1.44276 | -2.33962 | 0.36451  |        |        |        |        |
| H                                           | 2.61985  | -1.64954 | -0.10020 |        |        |        |        |
| H                                           | 0.93729  | -0.02217 | -1.45380 |        |        |        |        |
| H                                           | -1.59355 | 0.82029  | -0.16290 |        |        |        |        |
| H                                           | 0.71097  | 1.61481  | 0.22171  |        |        |        |        |
| O                                           | 1.32919  | 0.87822  | 0.36808  |        |        |        |        |
| O                                           | -0.92254 | 2.53734  | -0.15970 |        |        |        |        |
| O                                           | -1.96712 | 1.75319  | -0.21688 |        |        |        |        |
| Vibrational wavenumbers (cm <sup>-1</sup> ) |          |          |          |        |        |        |        |
| 62.7                                        | 87.5     | 135.6    | 186.0    | 206.9  | 290.6  | 377.4  | 583.8  |
| 608.7                                       | 661.8    | 785.0    | 835.3    | 878.2  | 922.7  | 983.2  | 1018.0 |
| 1035.2                                      | 1076.3   | 1204.4   | 1256.4   | 1289.6 | 1301.1 | 1326.0 | 1344.2 |
| 1487.0                                      | 1612.2   | 1659.5   | 1707.0   | 2950.5 | 3021.6 | 3219.7 | 3226.4 |
| 3628.5                                      |          |          |          |        |        |        |        |
| Rotational Constants (GHz):                 |          |          |          | 4.3082 | 1.2814 | 1.0162 |        |

| PC6a                                        |          |          |          |        |        |        |        |
|---------------------------------------------|----------|----------|----------|--------|--------|--------|--------|
| Cartesian Coordinates (Å)                   |          |          |          |        |        |        |        |
| N                                           | -1.47927 | 1.18999  | 0.61032  |        |        |        |        |
| C                                           | -1.60810 | -0.06510 | 0.10255  |        |        |        |        |
| N                                           | -0.44025 | -0.58666 | -0.14039 |        |        |        |        |
| C                                           | 0.50149  | 0.35465  | 0.21809  |        |        |        |        |
| C                                           | -0.14349 | 1.45799  | 0.68427  |        |        |        |        |
| H                                           | -2.56267 | -0.53311 | -0.06304 |        |        |        |        |
| H                                           | 0.13249  | -2.07299 | -0.76092 |        |        |        |        |
| H                                           | -2.21461 | 1.81531  | 0.88429  |        |        |        |        |
| H                                           | 1.19812  | 2.70576  | 1.15747  |        |        |        |        |
| O                                           | 0.24163  | 2.65451  | 1.16139  |        |        |        |        |
| H                                           | 1.55477  | 0.16503  | 0.11322  |        |        |        |        |
| O                                           | 1.90880  | -2.48920 | -0.97715 |        |        |        |        |
| O                                           | 0.65647  | -2.86083 | -1.09554 |        |        |        |        |
| Vibrational wavenumbers (cm <sup>-1</sup> ) |          |          |          |        |        |        |        |
| 43.5                                        | 55.4     | 59.5     | 146.8    | 229.6  | 271.6  | 315.9  | 418.4  |
| 548.2                                       | 679.5    | 683.2    | 706.2    | 798.5  | 825.4  | 831.1  | 957.5  |
| 1044.1                                      | 1127.5   | 1147.2   | 1178.8   | 1273.4 | 1299.1 | 1311.1 | 1431.3 |
| 1520.2                                      | 1571.0   | 1653.2   | 1675.4   | 3066.1 | 3278.5 | 3283.3 | 3700.6 |
| 3910.4                                      |          |          |          |        |        |        |        |
| Rotational Constants (GHz):                 |          |          |          | 4.7375 | 0.9691 | 0.8045 |        |

| M7s                                         |          |          |          |        |        |        |        |
|---------------------------------------------|----------|----------|----------|--------|--------|--------|--------|
| Cartesian Coordinates (Å)                   |          |          |          |        |        |        |        |
| N                                           | 0.21666  | -1.35705 | -0.52171 |        |        |        |        |
| C                                           | -0.61094 | -0.63155 | -1.31260 |        |        |        |        |
| N                                           | -1.20540 | 0.39944  | -0.85266 |        |        |        |        |
| C                                           | -0.88509 | 0.69393  | 0.46308  |        |        |        |        |
| C                                           | 0.46544  | -0.74913 | 0.78038  |        |        |        |        |
| H                                           | -0.76525 | -0.95392 | -2.33503 |        |        |        |        |
| H                                           | -1.65374 | 0.51489  | 1.21073  |        |        |        |        |
| H                                           | -0.09171 | -1.23655 | 1.58967  |        |        |        |        |
| H                                           | 0.98374  | -1.85109 | -0.94780 |        |        |        |        |
| H                                           | 1.44954  | 1.45325  | 0.24050  |        |        |        |        |
| O                                           | 1.58043  | -0.24245 | 1.00913  |        |        |        |        |
| O                                           | -0.28504 | 1.85491  | 0.77501  |        |        |        |        |
| O                                           | 0.80126  | 2.10533  | -0.09870 |        |        |        |        |
| Vibrational wavenumbers (cm <sup>-1</sup> ) |          |          |          |        |        |        |        |
| 61.4                                        | 151.2    | 212.1    | 250.9    | 360.1  | 370.5  | 446.6  | 470.4  |
| 549.3                                       | 580.5    | 650.8    | 774.2    | 840.8  | 938.9  | 996.4  | 1004.8 |
| 1011.9                                      | 1044.3   | 1103.7   | 1185.5   | 1213.8 | 1348.1 | 1380.7 | 1416.0 |
| 1452.9                                      | 1486.8   | 1529.1   | 1708.2   | 3010.1 | 3145.5 | 3202.3 | 3518.5 |
| 3641.3                                      |          |          |          |        |        |        |        |
| Rotational Constants (GHz):                 |          |          |          | 3.0273 | 2.3098 | 1.6577 |        |

| M8s                                         |          |          |          |        |        |        |        |
|---------------------------------------------|----------|----------|----------|--------|--------|--------|--------|
| Cartesian Coordinates (Å)                   |          |          |          |        |        |        |        |
| N                                           | -1.71555 | 0.70646  | 0.19864  |        |        |        |        |
| C                                           | -0.49897 | 1.34972  | -0.05560 |        |        |        |        |
| N                                           | 0.69929  | 0.79558  | -0.07228 |        |        |        |        |
| C                                           | 0.98424  | -0.41083 | 0.25639  |        |        |        |        |
| C                                           | -2.12451 | -0.51876 | -0.25503 |        |        |        |        |
| H                                           | -0.56460 | 2.41790  | -0.19887 |        |        |        |        |
| H                                           | 0.32970  | -1.18505 | 0.64657  |        |        |        |        |
| H                                           | -1.35986 | -1.04758 | -0.84171 |        |        |        |        |
| H                                           | -2.45331 | 1.25896  | 0.61027  |        |        |        |        |
| H                                           | 3.95614  | -0.48219 | -0.22484 |        |        |        |        |
| O                                           | -3.22211 | -0.97245 | -0.04664 |        |        |        |        |
| O                                           | 2.23313  | -0.91618 | 0.21479  |        |        |        |        |
| O                                           | 3.16404  | 0.06523  | -0.22611 |        |        |        |        |
| Vibrational wavenumbers (cm <sup>-1</sup> ) |          |          |          |        |        |        |        |
| 52.6                                        | 85.2     | 90.5     | 125.1    | 196.3  | 223.3  | 282.4  | 299.2  |
| 413.1                                       | 519.7    | 634.6    | 664.5    | 699.6  | 786.9  | 813.6  | 943.3  |
| 1043.3                                      | 1055.9   | 1177.0   | 1240.3   | 1308.7 | 1375.4 | 1403.7 | 1445.9 |
| 1460.7                                      | 1502.3   | 1579.6   | 1808.5   | 3019.4 | 3152.8 | 3216.5 | 3605.3 |
| 3847.3                                      |          |          |          |        |        |        |        |
| Rotational Constants (GHz):                 |          |          |          | 5.8009 | 0.9149 | 0.8038 |        |

---

**4H-4ol**

---

## Cartesian Coordinates (Å)

|   |          |          |          |
|---|----------|----------|----------|
| N | 0.00580  | 0.00505  | 0.01352  |
| C | -0.30849 | -0.73512 | 0.99625  |
| N | 0.75992  | -1.25628 | 1.79607  |
| C | 1.80503  | -0.78096 | 1.24445  |
| C | 1.46154  | 0.00899  | 0.00906  |
| H | 2.80615  | -0.97531 | 1.60616  |
| H | 1.76953  | -0.58623 | -0.86625 |
| H | 1.62113  | 1.78397  | -0.69844 |
| O | 2.03735  | 1.27602  | 0.00055  |
| H | -1.32778 | -0.98194 | 1.26091  |

---

Vibrational wavenumbers (cm<sup>-1</sup>)

|        |        |        |        |        |        |        |        |
|--------|--------|--------|--------|--------|--------|--------|--------|
| 192.7  | 244.7  | 370.7  | 584.7  | 619.9  | 783.8  | 872.0  | 907.6  |
| 970.6  | 1001.8 | 1021.7 | 1060.2 | 1190.1 | 1218.4 | 1292.9 | 1311.4 |
| 1337.6 | 1433.2 | 1618.6 | 1704.1 | 2966.8 | 3213.8 | 3221.8 | 3886.4 |

---

Rotational Constants (GHz): 8.0850 3.9370 2.8620

---

---

**5-ol**

---

## Cartesian Coordinates (Å)

|   |          |          |          |
|---|----------|----------|----------|
| N | -1.04031 | -1.46167 | -0.37930 |
| C | 0.02442  | -1.98513 | -1.05992 |
| N | 1.13997  | -1.41989 | -0.70800 |
| C | 0.80717  | -0.48170 | 0.24556  |
| C | -0.53918 | -0.50520 | 0.45075  |
| H | -0.09085 | -2.76854 | -1.78967 |
| H | -2.00716 | -1.71636 | -0.45928 |
| H | -0.90460 | 0.80514  | 1.76587  |
| O | -1.39623 | 0.17157  | 1.24294  |
| H | 1.54525  | 0.14315  | 0.71828  |

---

Vibrational wavenumbers (cm<sup>-1</sup>)

|        |        |        |        |        |        |        |        |
|--------|--------|--------|--------|--------|--------|--------|--------|
| 211.7  | 310.7  | 411.7  | 519.8  | 678.7  | 686.0  | 697.3  | 805.6  |
| 818.2  | 933.4  | 1045.0 | 1107.8 | 1144.0 | 1177.7 | 1294.8 | 1305.8 |
| 1419.6 | 1520.3 | 1561.7 | 1660.0 | 3262.1 | 3267.3 | 3702.4 | 3916.2 |

---

Rotational Constants (GHz): 9.5200 3.7114 2.6704

---

---

**Z-FMF**

---

## Cartesian Coordinates (Å)

|   |          |          |          |
|---|----------|----------|----------|
| N | -0.57433 | 0.39376  | -0.00023 |
| C | -0.01105 | -0.84381 | -0.00005 |
| N | 1.24455  | -1.12609 | -0.00005 |
| C | 2.18039  | -0.09939 | -0.00010 |
| C | -1.94740 | 0.59518  | -0.00016 |
| H | -0.73132 | -1.65542 | 0.00009  |
| H | 3.20948  | -0.47896 | 0.00018  |
| H | -2.20665 | 1.66357  | -0.00018 |
| H | 0.07184  | 1.17659  | -0.00049 |
| O | -2.76188 | -0.28312 | 0.00027  |
| O | 1.96606  | 1.09670  | 0.00026  |

---

Vibrational wavenumbers (cm<sup>-1</sup>)

|        |        |        |        |        |        |        |        |
|--------|--------|--------|--------|--------|--------|--------|--------|
| 93.5   | 115.0  | 192.2  | 262.4  | 271.4  | 456.6  | 484.1  | 779.3  |
| 840.8  | 854.9  | 1026.8 | 1046.6 | 1074.4 | 1087.8 | 1097.1 | 1265.5 |
| 1386.9 | 1428.7 | 1441.6 | 1484.7 | 1661.2 | 1751.9 | 1847.4 | 3020.5 |
| 3048.5 | 3184.3 | 3512.8 |        |        |        |        |        |

---

Rotational Constants (GHz):            8.3563    1.5380    1.2989

---

---

**E-FMF**

---

## Cartesian Coordinates (Å)

|   |          |          |          |
|---|----------|----------|----------|
| N | 0.56391  | 0.06587  | -1.05395 |
| C | -0.02128 | -0.04303 | 0.16837  |
| N | 0.66170  | 0.03157  | 1.23985  |
| C | -0.07507 | -0.00580 | 2.43103  |
| C | -0.11517 | -0.05214 | -2.25077 |
| H | -1.10053 | -0.20464 | 0.15696  |
| H | 0.50971  | -0.40606 | 3.27004  |
| H | -1.19098 | -0.24328 | -2.11517 |
| H | 1.55853  | 0.23964  | -1.09341 |
| O | 0.41452  | 0.04505  | -3.32015 |
| O | -1.20544 | 0.38281  | 2.56720  |

---

Vibrational wavenumbers (cm<sup>-1</sup>)

|        |        |        |        |        |        |        |        |
|--------|--------|--------|--------|--------|--------|--------|--------|
| 100.7  | 105.4  | 153.0  | 246.2  | 318.7  | 335.9  | 481.4  | 613.4  |
| 748.7  | 801.7  | 1032.8 | 1048.1 | 1068.2 | 1098.6 | 1235.3 | 1310.8 |
| 1346.7 | 1410.4 | 1433.5 | 1498.8 | 1700.3 | 1803.2 | 1853.0 | 3004.3 |
| 3032.0 | 3107.0 | 3608.0 |        |        |        |        |        |

---

Rotational Constants (GHz):            14.6836    1.0554    0.9908

---

---

**4a-ROONO**

---

## Cartesian Coordinates (Å)

|   |          |          |          |
|---|----------|----------|----------|
| N | -1.12610 | 1.90690  | 0.86465  |
| C | -1.07679 | 1.92606  | -0.50140 |
| N | -0.52413 | 0.93377  | -1.08285 |
| C | 0.00618  | 0.09959  | -0.02643 |
| C | -0.43620 | 0.72520  | 1.33058  |
| H | -1.52880 | 2.75024  | -1.03981 |
| H | 0.42253  | 0.96583  | 1.95360  |
| H | -1.21688 | 2.73841  | 1.41831  |
| H | -2.07101 | -0.26245 | 1.64114  |
| O | -1.24645 | -0.10954 | 2.10819  |
| H | -0.35023 | -0.92877 | -0.10335 |
| O | 1.41142  | -0.07596 | -0.12918 |
| O | 2.02957  | 1.17735  | -0.00610 |
| N | 2.42794  | 1.58600  | -1.33253 |
| O | 2.93795  | 2.62211  | -1.26745 |

Vibrational wavenumbers (cm<sup>-1</sup>)

|        |        |        |        |        |        |        |        |
|--------|--------|--------|--------|--------|--------|--------|--------|
| 53.1   | 70.0   | 100.4  | 192.9  | 239.8  | 268.3  | 299.5  | 351.2  |
| 385.3  | 459.5  | 488.8  | 545.5  | 575.0  | 696.0  | 773.5  | 824.4  |
| 877.6  | 970.5  | 984.8  | 1025.9 | 1060.0 | 1074.5 | 1085.0 | 1124.6 |
| 1153.9 | 1257.2 | 1289.3 | 1302.0 | 1358.9 | 1385.5 | 1443.5 | 1470.5 |
| 1688.4 | 1822.5 | 3097.3 | 3126.1 | 3200.8 | 3690.6 | 3867.9 |        |

---

Rotational Constants (GHz): 2.6916 0.9325 0.8349

---

---

**4s-ROONO**

---

## Cartesian Coordinates (Å)

|   |          |          |          |
|---|----------|----------|----------|
| N | -1.89865 | 1.13622  | -0.99540 |
| C | -1.58903 | 1.59430  | 0.25489  |
| N | -0.55393 | 1.10605  | 0.81803  |
| C | 0.01559  | 0.17849  | -0.13350 |
| C | -0.75977 | 0.37114  | -1.48824 |
| H | -2.23096 | 2.32280  | 0.73429  |
| H | -0.09766 | -0.84819 | 0.21844  |
| H | -1.08888 | -0.58201 | -1.89439 |
| H | -2.43608 | 1.69154  | -1.63837 |
| H | 0.51782  | 1.67049  | -2.14929 |
| O | -0.07282 | 1.00648  | -2.51641 |
| O | 1.42329  | 0.28736  | -0.23888 |
| O | 1.76588  | 1.61459  | -0.53424 |
| N | 2.16540  | 2.24800  | 0.72345  |
| O | 2.41918  | 3.35241  | 0.51764  |

Vibrational wavenumbers (cm<sup>-1</sup>)

|        |        |        |        |        |        |        |        |
|--------|--------|--------|--------|--------|--------|--------|--------|
| 50.2   | 87.2   | 95.7   | 209.0  | 256.8  | 291.3  | 337.2  | 394.3  |
| 419.9  | 491.6  | 523.3  | 537.0  | 588.2  | 690.3  | 794.9  | 825.4  |
| 878.7  | 897.3  | 990.8  | 1020.4 | 1044.1 | 1093.3 | 1096.4 | 1121.5 |
| 1186.3 | 1262.3 | 1296.0 | 1328.6 | 1359.5 | 1373.7 | 1453.4 | 1474.8 |
| 1693.0 | 1844.1 | 3088.4 | 3125.4 | 3204.6 | 3662.8 | 3834.3 |        |

---

Rotational Constants (GHz): 2.3582 1.0392 0.9282

---

| 4a-RO                                       |          |          |          |        |        |        |        |
|---------------------------------------------|----------|----------|----------|--------|--------|--------|--------|
| Cartesian Coordinates (Å)                   |          |          |          |        |        |        |        |
| N                                           | 0.02468  | 0.02145  | 0.05063  |        |        |        |        |
| C                                           | -0.42336 | -0.70303 | 1.13620  |        |        |        |        |
| N                                           | 0.44213  | -1.12749 | 1.96014  |        |        |        |        |
| C                                           | 1.74684  | -0.76623 | 1.42167  |        |        |        |        |
| C                                           | 1.46688  | 0.00142  | 0.03046  |        |        |        |        |
| H                                           | -1.49029 | -0.84727 | 1.26060  |        |        |        |        |
| H                                           | 1.87253  | -0.57198 | -0.79992 |        |        |        |        |
| H                                           | -0.49072 | 0.02858  | -0.81181 |        |        |        |        |
| H                                           | 1.61601  | 1.83738  | 0.58161  |        |        |        |        |
| O                                           | 2.04248  | 1.25935  | -0.05585 |        |        |        |        |
| H                                           | 2.24847  | -0.03778 | 2.07867  |        |        |        |        |
| O                                           | 2.56858  | -1.78148 | 1.15745  |        |        |        |        |
| Vibrational wavenumbers (cm <sup>-1</sup> ) |          |          |          |        |        |        |        |
| 65.2                                        | 221.3    | 311.7    | 346.0    | 383.0  | 492.0  | 550.3  | 597.1  |
| 693.0                                       | 727.5    | 889.3    | 965.7    | 1006.9 | 1013.9 | 1112.2 | 1134.7 |
| 1147.1                                      | 1169.5   | 1262.9   | 1301.1   | 1305.4 | 1365.7 | 1445.1 | 1460.0 |
| 1712.8                                      | 2958.1   | 3121.9   | 3192.2   | 3665.8 | 3861.6 |        |        |
| Rotational Constants (GHz):                 |          |          |          | 3.7219 | 3.2466 | 2.0028 |        |

| 4s-RO                                       |          |          |          |        |        |        |        |
|---------------------------------------------|----------|----------|----------|--------|--------|--------|--------|
| Cartesian Coordinates (Å)                   |          |          |          |        |        |        |        |
| N                                           | -0.11969 | -0.26275 | -0.08258 |        |        |        |        |
| C                                           | -0.47604 | -0.57380 | 1.21624  |        |        |        |        |
| N                                           | 0.45765  | -0.78665 | 2.05110  |        |        |        |        |
| C                                           | 1.69428  | -0.57440 | 1.30484  |        |        |        |        |
| C                                           | 1.28229  | 0.06116  | -0.07244 |        |        |        |        |
| H                                           | -1.52583 | -0.65956 | 1.46727  |        |        |        |        |
| H                                           | 2.15856  | -1.56498 | 1.10282  |        |        |        |        |
| H                                           | 1.80542  | -0.39588 | -0.91388 |        |        |        |        |
| H                                           | -0.73263 | 0.30788  | -0.64044 |        |        |        |        |
| H                                           | 2.31472  | 1.65856  | 0.27412  |        |        |        |        |
| O                                           | 1.44942  | 1.45436  | -0.09029 |        |        |        |        |
| O                                           | 2.67286  | 0.08242  | 1.93892  |        |        |        |        |
| Vibrational wavenumbers (cm <sup>-1</sup> ) |          |          |          |        |        |        |        |
| 91.0                                        | 226.8    | 272.0    | 342.2    | 472.8  | 497.4  | 581.7  | 642.4  |
| 787.9                                       | 826.6    | 868.1    | 978.9    | 994.0  | 1057.6 | 1064.2 | 1125.7 |
| 1143.1                                      | 1170.4   | 1224.1   | 1258.2   | 1328.0 | 1362.2 | 1405.3 | 1462.8 |
| 1702.1                                      | 2851.9   | 3071.0   | 3205.4   | 3649.4 | 3857.7 |        |        |
| Rotational Constants (GHz):                 |          |          |          | 3.8964 | 3.4469 | 2.0938 |        |

| TS12a                                       |          |          |          |        |        |        |        |
|---------------------------------------------|----------|----------|----------|--------|--------|--------|--------|
| Cartesian Coordinates (Å)                   |          |          |          |        |        |        |        |
| N                                           | -0.02976 | 0.12393  | -0.01958 |        |        |        |        |
| C                                           | -0.57236 | -0.28962 | 1.18784  |        |        |        |        |
| N                                           | 0.18560  | -0.66031 | 2.12556  |        |        |        |        |
| C                                           | 1.56341  | -0.71167 | 1.71887  |        |        |        |        |
| C                                           | 1.38131  | -0.00649 | -0.06886 |        |        |        |        |
| H                                           | -1.65098 | -0.23676 | 1.28659  |        |        |        |        |
| H                                           | 1.79547  | -0.78050 | -0.70207 |        |        |        |        |
| H                                           | -0.56475 | 0.01134  | -0.86457 |        |        |        |        |
| H                                           | 1.58126  | 1.86307  | 0.19254  |        |        |        |        |
| O                                           | 2.07239  | 1.14830  | -0.22315 |        |        |        |        |
| H                                           | 2.15461  | 0.12198  | 2.13528  |        |        |        |        |
| O                                           | 2.12057  | -1.81673 | 1.53020  |        |        |        |        |
| Vibrational wavenumbers (cm <sup>-1</sup> ) |          |          |          |        |        |        |        |
| 430.8 <i>i</i>                              | 73.6     | 250.4    | 316.5    | 345.6  | 389.8  | 473.7  | 533.1  |
| 606.3                                       | 707.4    | 872.3    | 939.2    | 974.9  | 1000.8 | 1017.9 | 1094.7 |
| 1142.3                                      | 1215.1   | 1303.4   | 1344.8   | 1378.1 | 1436.2 | 1453.7 | 1470.5 |
| 1741.7                                      | 2941.7   | 3183.3   | 3189.6   | 3637.2 | 3847.6 |        |        |
| Rotational Constants (GHz):                 |          |          |          | 3.7948 | 2.9833 | 1.9615 |        |

| TS12s                                       |          |          |          |        |        |        |        |
|---------------------------------------------|----------|----------|----------|--------|--------|--------|--------|
| Cartesian Coordinates (Å)                   |          |          |          |        |        |        |        |
| N                                           | -0.11050 | 0.04028  | 0.02250  |        |        |        |        |
| C                                           | -0.45348 | -0.62950 | 1.17954  |        |        |        |        |
| N                                           | 0.47076  | -1.11871 | 1.89461  |        |        |        |        |
| C                                           | 1.75971  | -0.65204 | 1.40642  |        |        |        |        |
| C                                           | 1.30496  | -0.01473 | -0.17805 |        |        |        |        |
| H                                           | -1.50522 | -0.73864 | 1.41712  |        |        |        |        |
| H                                           | 2.44423  | -1.46965 | 1.14245  |        |        |        |        |
| H                                           | 1.59257  | -0.79993 | -0.87371 |        |        |        |        |
| H                                           | -0.60884 | 0.86395  | -0.27010 |        |        |        |        |
| H                                           | 2.03246  | 1.68612  | 0.25685  |        |        |        |        |
| O                                           | 1.90542  | 1.14958  | -0.53264 |        |        |        |        |
| O                                           | 2.27873  | 0.35179  | 2.00920  |        |        |        |        |
| Vibrational wavenumbers (cm <sup>-1</sup> ) |          |          |          |        |        |        |        |
| 312.1 <i>i</i>                              | 86.7     | 237.7    | 302.1    | 372.5  | 403.2  | 420.4  | 497.6  |
| 618.2                                       | 715.8    | 871.9    | 948.4    | 971.1  | 1003.1 | 1089.8 | 1146.8 |
| 1165.1                                      | 1207.9   | 1295.7   | 1337.3   | 1370.2 | 1382.8 | 1426.1 | 1455.5 |
| 1713.9                                      | 2989.9   | 3117.0   | 3191.1   | 3650.5 | 3819.4 |        |        |
| Rotational Constants (GHz):                 |          |          |          | 4.0870 | 3.2517 | 2.0571 |        |



| TS13a                                       |          |          |          |        |        |        |        |
|---------------------------------------------|----------|----------|----------|--------|--------|--------|--------|
| Cartesian Coordinates (Å)                   |          |          |          |        |        |        |        |
| N                                           | 0.00546  | -0.01119 | -0.00379 |        |        |        |        |
| C                                           | -0.48309 | -0.14506 | 1.25538  |        |        |        |        |
| N                                           | 0.26545  | -0.52595 | 2.20823  |        |        |        |        |
| C                                           | 1.85242  | -0.81596 | 1.25170  |        |        |        |        |
| C                                           | 1.44932  | 0.00704  | 0.00071  |        |        |        |        |
| H                                           | -1.52873 | 0.08386  | 1.44972  |        |        |        |        |
| H                                           | 1.84443  | -0.47840 | -0.88762 |        |        |        |        |
| H                                           | -0.51763 | 0.45058  | -0.72549 |        |        |        |        |
| H                                           | 1.75987  | 1.72432  | 0.84976  |        |        |        |        |
| O                                           | 1.98319  | 1.29980  | 0.01734  |        |        |        |        |
| H                                           | 2.52144  | -0.27682 | 1.94104  |        |        |        |        |
| O                                           | 1.90601  | -2.05558 | 1.16303  |        |        |        |        |
| Vibrational wavenumbers (cm <sup>-1</sup> ) |          |          |          |        |        |        |        |
| 567.4 <i>i</i>                              | 101.3    | 221.5    | 320.6    | 340.4  | 365.6  | 458.0  | 493.7  |
| 594.5                                       | 633.0    | 846.0    | 926.5    | 944.2  | 970.4  | 1060.4 | 1107.8 |
| 1173.4                                      | 1245.1   | 1263.4   | 1298.9   | 1367.1 | 1426.2 | 1465.0 | 1488.9 |
| 1676.0                                      | 2969.2   | 3141.2   | 3143.0   | 3680.4 | 3855.8 |        |        |
| Rotational Constants (GHz):                 |          |          |          | 3.6570 | 3.0726 | 2.1347 |        |

| TS13s                                       |          |          |          |        |        |        |        |
|---------------------------------------------|----------|----------|----------|--------|--------|--------|--------|
| Cartesian Coordinates (Å)                   |          |          |          |        |        |        |        |
| N                                           | -0.05865 | -0.06972 | -0.03875 |        |        |        |        |
| C                                           | -0.40614 | -0.00879 | 1.27556  |        |        |        |        |
| N                                           | 0.44023  | -0.25752 | 2.18621  |        |        |        |        |
| C                                           | 1.90961  | -0.67058 | 1.16637  |        |        |        |        |
| C                                           | 1.38670  | -0.08084 | -0.17337 |        |        |        |        |
| H                                           | -1.43618 | 0.20819  | 1.54826  |        |        |        |        |
| H                                           | 1.80559  | -1.75628 | 1.28361  |        |        |        |        |
| H                                           | 1.66803  | -0.72959 | -1.00551 |        |        |        |        |
| H                                           | -0.59647 | 0.44707  | -0.71412 |        |        |        |        |
| H                                           | 2.52133  | 1.33787  | 0.36905  |        |        |        |        |
| O                                           | 1.90271  | 1.19120  | -0.36364 |        |        |        |        |
| O                                           | 2.89120  | -0.08457 | 1.67597  |        |        |        |        |
| Vibrational wavenumbers (cm <sup>-1</sup> ) |          |          |          |        |        |        |        |
| 531.4 <i>i</i>                              | 108.5    | 305.6    | 325.6    | 358.1  | 485.4  | 511.6  | 551.2  |
| 589.5                                       | 749.3    | 818.7    | 888.4    | 941.7  | 1012.6 | 1053.0 | 1142.9 |
| 1181.4                                      | 1217.2   | 1260.7   | 1321.4   | 1378.3 | 1415.6 | 1456.6 | 1493.7 |
| 1688.8                                      | 3015.4   | 3070.7   | 3148.8   | 3649.5 | 3688.6 |        |        |
| Rotational Constants (GHz):                 |          |          |          | 3.9761 | 3.2394 | 2.1024 |        |

| TS14a                                       |          |          |          |        |        |        |        |
|---------------------------------------------|----------|----------|----------|--------|--------|--------|--------|
| Cartesian Coordinates (Å)                   |          |          |          |        |        |        |        |
| N                                           | 0.00222  | -0.00419 | 0.00312  |        |        |        |        |
| C                                           | -0.41011 | -0.97257 | 0.85254  |        |        |        |        |
| N                                           | 0.48079  | -1.53680 | 1.59722  |        |        |        |        |
| C                                           | 1.70767  | -0.92538 | 1.23978  |        |        |        |        |
| C                                           | 1.45314  | 0.00312  | 0.00254  |        |        |        |        |
| H                                           | -1.46017 | -1.23315 | 0.90041  |        |        |        |        |
| H                                           | 1.83591  | -0.50924 | -0.88273 |        |        |        |        |
| H                                           | -0.55002 | 0.32510  | -0.76705 |        |        |        |        |
| H                                           | 1.98077  | 1.62115  | 0.90115  |        |        |        |        |
| O                                           | 2.03893  | 1.25264  | 0.01461  |        |        |        |        |
| H                                           | 1.56502  | 0.32544  | 2.37707  |        |        |        |        |
| O                                           | 2.81590  | -1.26501 | 1.61147  |        |        |        |        |
| Vibrational wavenumbers (cm <sup>-1</sup> ) |          |          |          |        |        |        |        |
| 1080.7 <i>i</i>                             | 114.4    | 256.1    | 315.7    | 339.5  | 431.3  | 471.6  | 526.1  |
| 577.7                                       | 594.4    | 672.9    | 724.9    | 842.5  | 910.0  | 1008.6 | 1028.2 |
| 1111.8                                      | 1151.5   | 1191.9   | 1264.0   | 1302.5 | 1355.1 | 1434.6 | 1481.3 |
| 1625.7                                      | 1705.5   | 3077.7   | 3204.4   | 3689.3 | 3822.8 |        |        |
| Rotational Constants (GHz):                 |          |          |          | 3.6462 | 3.4900 | 1.9186 |        |

| TS14s                                       |          |          |          |        |        |        |        |
|---------------------------------------------|----------|----------|----------|--------|--------|--------|--------|
| Cartesian Coordinates (Å)                   |          |          |          |        |        |        |        |
| N                                           | 0.01915  | -0.07098 | -0.06971 |        |        |        |        |
| C                                           | -0.32327 | -0.58630 | 1.13114  |        |        |        |        |
| N                                           | 0.62708  | -1.02748 | 1.88673  |        |        |        |        |
| C                                           | 1.81743  | -0.77252 | 1.16456  |        |        |        |        |
| C                                           | 1.45084  | -0.02474 | -0.16193 |        |        |        |        |
| H                                           | -1.36572 | -0.62756 | 1.41936  |        |        |        |        |
| H                                           | 1.81852  | -2.33007 | 0.47497  |        |        |        |        |
| H                                           | 1.80956  | -0.53254 | -1.05850 |        |        |        |        |
| H                                           | -0.60388 | 0.42345  | -0.67917 |        |        |        |        |
| H                                           | 2.76033  | 1.27173  | 0.37232  |        |        |        |        |
| O                                           | 1.92701  | 1.28962  | -0.11041 |        |        |        |        |
| O                                           | 2.94905  | -0.76177 | 1.61068  |        |        |        |        |
| Vibrational wavenumbers (cm <sup>-1</sup> ) |          |          |          |        |        |        |        |
| 1062.6 <i>i</i>                             | 77.2     | 245.7    | 254.0    | 314.8  | 413.5  | 457.8  | 482.3  |
| 544.4                                       | 578.2    | 688.5    | 798.7    | 847.8  | 893.4  | 1009.8 | 1054.7 |
| 1101.2                                      | 1128.4   | 1193.5   | 1229.4   | 1344.4 | 1368.0 | 1376.8 | 1493.0 |
| 1622.0                                      | 1726.4   | 3073.8   | 3214.0   | 3708.8 | 3819.0 |        |        |
| Rotational Constants (GHz):                 |          |          |          | 3.8125 | 3.4912 | 2.0464 |        |

| TS15a                                       |          |          |          |        |        |        |        |
|---------------------------------------------|----------|----------|----------|--------|--------|--------|--------|
| Cartesian Coordinates (Å)                   |          |          |          |        |        |        |        |
| N                                           | 1.63831  | 1.97932  | -0.29636 |        |        |        |        |
| C                                           | 1.20831  | 0.72936  | 0.01377  |        |        |        |        |
| N                                           | 0.06972  | 0.32131  | 0.44197  |        |        |        |        |
| C                                           | -1.10401 | 1.01645  | 0.34840  |        |        |        |        |
| C                                           | 1.00879  | 3.19492  | -0.10086 |        |        |        |        |
| H                                           | 2.00005  | -0.00922 | -0.08502 |        |        |        |        |
| H                                           | 0.96472  | 3.91271  | -0.90505 |        |        |        |        |
| H                                           | 2.56249  | 2.02057  | -0.69317 |        |        |        |        |
| H                                           | -0.60866 | 3.60277  | 0.80812  |        |        |        |        |
| O                                           | 0.29587  | 3.35717  | 1.02666  |        |        |        |        |
| H                                           | -1.80652 | 0.76200  | 1.15528  |        |        |        |        |
| O                                           | -1.43021 | 1.77200  | -0.54753 |        |        |        |        |
| Vibrational wavenumbers (cm <sup>-1</sup> ) |          |          |          |        |        |        |        |
| 220.8 <i>i</i>                              | 100.5    | 118.0    | 176.6    | 211.6  | 252.3  | 317.3  | 433.4  |
| 512.5                                       | 561.0    | 749.9    | 874.3    | 972.4  | 985.8  | 1061.3 | 1090.6 |
| 1220.9                                      | 1230.3   | 1314.6   | 1421.0   | 1444.0 | 1486.0 | 1542.7 | 1681.2 |
| 1738.8                                      | 3008.3   | 3140.1   | 3228.1   | 3628.4 | 3820.7 |        |        |
| Rotational Constants (GHz):                 |          |          |          | 3.7877 | 2.8693 | 1.9895 |        |

| TS16a                                       |          |          |          |        |        |        |        |
|---------------------------------------------|----------|----------|----------|--------|--------|--------|--------|
| Cartesian Coordinates (Å)                   |          |          |          |        |        |        |        |
| N                                           | 0.18415  | -0.14220 | -0.13945 |        |        |        |        |
| C                                           | -0.59921 | -1.11145 | 0.47921  |        |        |        |        |
| N                                           | -0.25858 | -1.76232 | 1.56849  |        |        |        |        |
| C                                           | 0.69425  | -1.27578 | 2.37956  |        |        |        |        |
| C                                           | 1.46575  | 0.02433  | 0.18813  |        |        |        |        |
| H                                           | -1.50168 | -1.37311 | -0.05547 |        |        |        |        |
| H                                           | 2.10953  | -0.83459 | 0.28553  |        |        |        |        |
| H                                           | -0.27332 | 0.62456  | -0.61055 |        |        |        |        |
| H                                           | 2.89080  | 1.25683  | 0.19737  |        |        |        |        |
| O                                           | 1.98279  | 1.21279  | -0.10648 |        |        |        |        |
| H                                           | 0.95788  | -1.92279 | 3.21932  |        |        |        |        |
| O                                           | 1.28923  | -0.17125 | 2.24632  |        |        |        |        |
| Vibrational wavenumbers (cm <sup>-1</sup> ) |          |          |          |        |        |        |        |
| 311.1 <i>i</i>                              | 177.2    | 241.1    | 287.4    | 353.6  | 395.0  | 476.3  | 528.5  |
| 563.1                                       | 662.1    | 723.8    | 888.7    | 917.9  | 945.8  | 1027.9 | 1155.8 |
| 1200.9                                      | 1277.5   | 1317.7   | 1351.4   | 1411.7 | 1444.9 | 1477.5 | 1517.8 |
| 1626.6                                      | 3079.0   | 3201.8   | 3232.8   | 3595.5 | 3904.1 |        |        |
| Rotational Constants (GHz):                 |          |          |          | 5.0048 | 2.5379 | 1.7680 |        |

| TS16s                                       |          |          |          |        |        |        |        |
|---------------------------------------------|----------|----------|----------|--------|--------|--------|--------|
| Cartesian Coordinates (Å)                   |          |          |          |        |        |        |        |
| N                                           | -0.05099 | -1.71912 | -1.60360 |        |        |        |        |
| C                                           | -0.63886 | -0.78619 | -0.80529 |        |        |        |        |
| N                                           | 0.02959  | 0.15332  | -0.18886 |        |        |        |        |
| C                                           | 1.37791  | 0.03514  | -0.12923 |        |        |        |        |
| C                                           | 1.23145  | -1.59354 | -2.05592 |        |        |        |        |
| H                                           | -1.71742 | -0.82017 | -0.74205 |        |        |        |        |
| H                                           | 1.82498  | -0.79502 | 0.40888  |        |        |        |        |
| H                                           | 1.66640  | -2.44353 | -2.57198 |        |        |        |        |
| H                                           | -0.60881 | -2.47577 | -1.95810 |        |        |        |        |
| H                                           | 1.48562  | 1.89107  | -0.19576 |        |        |        |        |
| O                                           | 1.91396  | -0.56424 | -1.72754 |        |        |        |        |
| O                                           | 2.06095  | 1.16488  | 0.06643  |        |        |        |        |
| Vibrational wavenumbers (cm <sup>-1</sup> ) |          |          |          |        |        |        |        |
| 503.6 <i>i</i>                              | 158.8    | 272.8    | 369.3    | 438.2  | 467.3  | 526.6  | 579.1  |
| 610.4                                       | 628.6    | 646.0    | 810.3    | 964.0  | 1007.6 | 1057.3 | 1084.5 |
| 1174.4                                      | 1245.5   | 1325.0   | 1363.1   | 1399.1 | 1477.6 | 1506.9 | 1531.1 |
| 1630.5                                      | 3143.8   | 3149.9   | 3208.3   | 3667.8 | 3830.8 |        |        |
| Rotational Constants (GHz):                 |          |          |          | 5.2290 | 2.7062 | 1.8615 |        |

| TS17a                                       |          |          |          |        |        |        |        |
|---------------------------------------------|----------|----------|----------|--------|--------|--------|--------|
| Cartesian Coordinates (Å)                   |          |          |          |        |        |        |        |
| N                                           | -1.01652 | 0.75308  | -0.28800 |        |        |        |        |
| C                                           | 0.24149  | 1.19426  | -0.07956 |        |        |        |        |
| N                                           | 1.12146  | 0.54805  | 0.58251  |        |        |        |        |
| C                                           | 2.10189  | -0.34303 | 0.38331  |        |        |        |        |
| C                                           | -1.46990 | -0.50287 | 0.00807  |        |        |        |        |
| H                                           | 0.41704  | 2.19819  | -0.46672 |        |        |        |        |
| H                                           | -0.82968 | -1.15852 | 0.57907  |        |        |        |        |
| H                                           | -1.67625 | 1.38108  | -0.71911 |        |        |        |        |
| H                                           | -3.08678 | -1.49849 | 0.11864  |        |        |        |        |
| O                                           | -2.82081 | -0.57921 | 0.08486  |        |        |        |        |
| H                                           | 2.64651  | -0.58130 | 1.30848  |        |        |        |        |
| O                                           | 2.39001  | -0.86316 | -0.67896 |        |        |        |        |
| Vibrational wavenumbers (cm <sup>-1</sup> ) |          |          |          |        |        |        |        |
| 192.7 <i>i</i>                              | 85.3     | 128.0    | 172.1    | 198.3  | 298.3  | 395.3  | 442.2  |
| 514.7                                       | 643.2    | 714.7    | 770.4    | 920.7  | 1009.4 | 1042.6 | 1108.1 |
| 1227.4                                      | 1252.9   | 1299.0   | 1411.4   | 1421.4 | 1470.9 | 1586.5 | 1719.8 |
| 1744.0                                      | 3001.9   | 3100.7   | 3226.3   | 3637.4 | 3913.8 |        |        |
| Rotational Constants (GHz):                 |          |          |          | 6.3386 | 1.3716 | 1.2245 |        |

| TS17s                                       |          |          |          |        |        |        |        |
|---------------------------------------------|----------|----------|----------|--------|--------|--------|--------|
| Cartesian Coordinates (Å)                   |          |          |          |        |        |        |        |
| N                                           | -1.44209 | 0.03770  | 0.58610  |        |        |        |        |
| C                                           | -0.17997 | 0.03184  | 1.20226  |        |        |        |        |
| N                                           | 0.88077  | -0.00265 | 0.49266  |        |        |        |        |
| C                                           | 2.05166  | -0.03311 | 0.02229  |        |        |        |        |
| C                                           | -1.72363 | 0.01029  | -0.75131 |        |        |        |        |
| H                                           | -0.22834 | 0.05883  | 2.29040  |        |        |        |        |
| H                                           | 2.98629  | -0.03493 | 0.57874  |        |        |        |        |
| H                                           | -2.81166 | 0.02381  | -0.92692 |        |        |        |        |
| H                                           | -2.23939 | 0.06536  | 1.19813  |        |        |        |        |
| H                                           | 1.37793  | -0.06399 | -1.71628 |        |        |        |        |
| O                                           | -0.93078 | -0.02449 | -1.66569 |        |        |        |        |
| O                                           | 2.25922  | -0.06865 | -1.31041 |        |        |        |        |
| Vibrational wavenumbers (cm <sup>-1</sup> ) |          |          |          |        |        |        |        |
| 208.9 <i>i</i>                              | 109.9    | 117.5    | 219.9    | 256.0  | 323.7  | 397.7  | 560.1  |
| 616.0                                       | 655.3    | 701.1    | 818.8    | 873.6  | 955.5  | 1010.4 | 1083.1 |
| 1184.3                                      | 1271.7   | 1327.0   | 1394.8   | 1451.4 | 1516.6 | 1561.2 | 1701.3 |
| 1780.0                                      | 2977.2   | 3087.4   | 3128.3   | 3659.1 | 3710.3 |        |        |
| Rotational Constants (GHz):                 |          |          |          | 4.6960 | 2.0609 | 1.4323 |        |

| TS18a                                       |          |          |          |        |        |        |        |
|---------------------------------------------|----------|----------|----------|--------|--------|--------|--------|
| Cartesian Coordinates (Å)                   |          |          |          |        |        |        |        |
| N                                           | 0.12900  | -0.02016 | 0.11686  |        |        |        |        |
| C                                           | -0.27055 | 1.26316  | 0.26077  |        |        |        |        |
| N                                           | 0.54881  | 2.24618  | 0.35795  |        |        |        |        |
| C                                           | -0.03535 | 3.50534  | 0.38687  |        |        |        |        |
| C                                           | 1.43287  | -0.43774 | -0.11460 |        |        |        |        |
| H                                           | -1.35252 | 1.39579  | 0.30253  |        |        |        |        |
| H                                           | 1.93437  | -1.11141 | 0.56235  |        |        |        |        |
| H                                           | -0.58746 | -0.72329 | 0.17444  |        |        |        |        |
| H                                           | 3.01597  | 0.28242  | -0.89857 |        |        |        |        |
| O                                           | 2.09030  | 0.17006  | -1.11965 |        |        |        |        |
| H                                           | 0.61422  | 4.25328  | 0.86447  |        |        |        |        |
| O                                           | -1.11084 | 3.81027  | -0.07196 |        |        |        |        |
| Vibrational wavenumbers (cm <sup>-1</sup> ) |          |          |          |        |        |        |        |
| 352.9 <i>i</i>                              | 67.6     | 70.3     | 133.9    | 197.0  | 214.1  | 290.6  | 331.6  |
| 512.8                                       | 524.8    | 724.6    | 849.9    | 991.7  | 1039.1 | 1067.2 | 1132.7 |
| 1223.0                                      | 1246.3   | 1315.9   | 1387.7   | 1423.0 | 1462.6 | 1541.5 | 1667.3 |
| 1776.9                                      | 3009.7   | 3105.8   | 3228.1   | 3641.6 | 3893.4 |        |        |
| Rotational Constants (GHz):                 |          |          |          | 7.2787 | 1.4143 | 1.2670 |        |

---

**TS19a**

---

## Cartesian Coordinates (Å)

|   |          |          |          |
|---|----------|----------|----------|
| N | 0.42430  | 0.27177  | 0.03621  |
| C | -0.30117 | 1.35372  | 0.41929  |
| N | 0.28419  | 2.54851  | 0.30828  |
| C | -0.42876 | 3.65345  | 0.68871  |
| C | 1.67842  | 0.32471  | -0.44176 |
| H | -1.30332 | 1.19651  | 0.79022  |
| H | 2.16482  | -0.59954 | -0.71766 |
| H | -0.00340 | -0.63476 | 0.11411  |
| H | 1.56165  | 2.20158  | -0.21695 |
| O | 2.29001  | 1.45450  | -0.56907 |
| H | 0.14050  | 4.58418  | 0.55861  |
| O | -1.56264 | 3.64937  | 1.12502  |

---

Vibrational wavenumbers (cm<sup>-1</sup>)

|                |        |        |        |        |        |        |        |
|----------------|--------|--------|--------|--------|--------|--------|--------|
| 715.8 <i>i</i> | 98.4   | 202.2  | 228.7  | 343.6  | 443.3  | 496.8  | 664.8  |
| 695.3          | 702.8  | 768.1  | 808.1  | 905.8  | 1024.9 | 1073.2 | 1136.8 |
| 1210.2         | 1250.5 | 1318.8 | 1357.7 | 1422.0 | 1516.1 | 1551.2 | 1642.0 |
| 1737.0         | 1919.2 | 3016.9 | 3221.2 | 3230.6 | 3671.2 |        |        |

---

Rotational Constants (GHz): 7.7141 1.6087 1.3311

---

---

**TS20**

---

## Cartesian Coordinates (Å)

|   |          |          |          |
|---|----------|----------|----------|
| N | 0.05007  | -0.15978 | 0.07343  |
| C | -0.44743 | -0.77434 | -1.05219 |
| N | 0.38053  | -1.24772 | -1.89009 |
| C | 2.28425  | -0.97797 | 0.78622  |
| C | 1.47175  | -0.06545 | -0.06158 |
| H | -1.52347 | -0.86524 | -1.17008 |
| H | 1.85916  | -1.97800 | 0.96469  |
| H | 1.45083  | -0.67648 | -1.23250 |
| H | -0.45674 | 0.55785  | 0.56290  |
| H | 2.81255  | 1.19346  | 0.32650  |
| O | 1.93198  | 1.21272  | -0.07702 |
| O | 3.36373  | -0.63982 | 1.20625  |

---

Vibrational wavenumbers (cm<sup>-1</sup>)

|                 |        |        |        |        |        |        |        |
|-----------------|--------|--------|--------|--------|--------|--------|--------|
| 1919.0 <i>i</i> | 102.1  | 161.2  | 252.6  | 319.3  | 380.3  | 417.3  | 507.3  |
| 545.1           | 583.6  | 706.3  | 857.8  | 928.1  | 954.0  | 1036.8 | 1117.1 |
| 1146.3          | 1231.0 | 1278.7 | 1316.3 | 1366.8 | 1443.5 | 1462.7 | 1661.9 |
| 1779.0          | 1808.6 | 3002.1 | 3160.0 | 3655.8 | 3727.5 |        |        |

---

Rotational Constants (GHz): 5.4181 1.8679 1.6621

---

---

**TS21**

---

## Cartesian Coordinates (Å)

|   |          |          |          |
|---|----------|----------|----------|
| N | -0.10462 | 0.22579  | 0.14126  |
| C | -0.75520 | -0.48837 | 1.11685  |
| N | -0.24416 | -1.25180 | 1.99131  |
| C | 1.93867  | -0.56769 | 1.09398  |
| C | 1.29182  | 0.01124  | -0.16791 |
| H | -1.83600 | -0.33870 | 1.12007  |
| H | 1.03747  | -1.27217 | 1.70258  |
| H | 1.39062  | -0.75131 | -0.95139 |
| H | -0.66172 | 0.64812  | -0.57927 |
| H | 2.50679  | 1.48119  | 0.07284  |
| O | 1.90890  | 1.16977  | -0.61442 |
| O | 2.96495  | -0.17600 | 1.54335  |

---

Vibrational wavenumbers (cm<sup>-1</sup>)

|                 |        |        |        |        |        |        |        |
|-----------------|--------|--------|--------|--------|--------|--------|--------|
| 1782.1 <i>i</i> | 73.1   | 143.0  | 177.3  | 290.6  | 327.3  | 441.4  | 463.4  |
| 495.9           | 596.7  | 713.8  | 790.6  | 898.4  | 953.6  | 1036.5 | 1146.8 |
| 1180.2          | 1201.8 | 1283.7 | 1324.4 | 1342.1 | 1416.3 | 1510.2 | 1657.0 |
| 1697.7          | 1883.2 | 3005.3 | 3095.0 | 3676.2 | 3820.0 |        |        |

---

Rotational Constants (GHz): 4.1564 2.4931 1.6358

---

---

**M12a**

---

## Cartesian Coordinates (Å)

|   |          |          |          |
|---|----------|----------|----------|
| N | -0.50255 | 0.94849  | -0.07532 |
| C | -1.41226 | -0.01180 | 0.21006  |
| N | -1.23879 | -1.24854 | 0.51806  |
| C | -0.14293 | -2.02004 | 0.27256  |
| C | 0.86625  | 0.86347  | -0.10109 |
| H | -2.42483 | 0.37891  | 0.23257  |
| H | 1.33223  | -0.05392 | -0.43517 |
| H | -0.86889 | 1.88330  | -0.17308 |
| H | 2.37934  | 1.96017  | -0.45021 |
| O | 1.43758  | 2.07304  | -0.32322 |
| H | -0.01251 | -2.80970 | 1.02628  |
| O | 0.58717  | -1.96339 | -0.70154 |

---

Vibrational wavenumbers (cm<sup>-1</sup>)

|        |        |        |        |        |        |        |        |
|--------|--------|--------|--------|--------|--------|--------|--------|
| 103.1  | 154.1  | 187.0  | 197.8  | 272.2  | 276.8  | 424.5  | 454.1  |
| 596.2  | 642.6  | 722.5  | 858.8  | 941.3  | 1002.2 | 1052.9 | 1109.0 |
| 1227.6 | 1261.9 | 1305.6 | 1416.7 | 1421.5 | 1476.2 | 1588.3 | 1682.5 |
| 1720.5 | 3011.2 | 3158.6 | 3186.8 | 3618.6 | 3925.3 |        |        |

---

Rotational Constants (GHz): 4.9629 1.8797 1.4210

---

| M12s                                        |          |          |          |        |        |        |        |
|---------------------------------------------|----------|----------|----------|--------|--------|--------|--------|
| Cartesian Coordinates (Å)                   |          |          |          |        |        |        |        |
| N                                           | -1.26993 | -0.00000 | 0.46860  |        |        |        |        |
| C                                           | -0.11419 | -0.00000 | 1.27495  |        |        |        |        |
| N                                           | 1.17713  | 0.00000  | 1.04142  |        |        |        |        |
| C                                           | 1.98909  | 0.00000  | 0.03223  |        |        |        |        |
| C                                           | -1.53382 | 0.00000  | -0.85563 |        |        |        |        |
| H                                           | -0.40552 | -0.00000 | 2.31753  |        |        |        |        |
| H                                           | 3.04852  | 0.00000  | 0.26141  |        |        |        |        |
| H                                           | -2.61202 | 0.00000  | -1.05614 |        |        |        |        |
| H                                           | -2.10578 | -0.00000 | 1.02994  |        |        |        |        |
| H                                           | 0.79197  | -0.00000 | -1.47742 |        |        |        |        |
| O                                           | -0.72862 | 0.00000  | -1.77426 |        |        |        |        |
| O                                           | 1.76307  | -0.00000 | -1.26273 |        |        |        |        |
| Vibrational wavenumbers (cm <sup>-1</sup> ) |          |          |          |        |        |        |        |
| 56.9                                        | 109.8    | 217.5    | 320.6    | 378.5  | 493.4  | 498.4  | 651.9  |
| 684.6                                       | 712.1    | 826.1    | 855.9    | 947.4  | 972.9  | 996.0  | 1129.6 |
| 1251.1                                      | 1326.1   | 1425.7   | 1450.5   | 1472.2 | 1527.5 | 1582.8 | 1617.0 |
| 1754.1                                      | 3035.9   | 3122.0   | 3176.4   | 3190.4 | 3640.0 |        |        |
| Rotational Constants (GHz):                 |          |          |          | 4.0121 | 2.5739 | 1.5680 |        |

| M13                                         |          |          |          |        |        |        |        |
|---------------------------------------------|----------|----------|----------|--------|--------|--------|--------|
| Cartesian Coordinates (Å)                   |          |          |          |        |        |        |        |
| N                                           | 0.05039  | -0.18066 | -0.17358 |        |        |        |        |
| C                                           | -0.63939 | 0.49422  | -1.13519 |        |        |        |        |
| N                                           | -0.12223 | 1.26452  | -1.98953 |        |        |        |        |
| C                                           | 1.98617  | -0.86419 | 1.08770  |        |        |        |        |
| C                                           | 1.46159  | 0.00066  | -0.04872 |        |        |        |        |
| H                                           | -1.72030 | 0.33271  | -1.14666 |        |        |        |        |
| H                                           | 1.94395  | -0.32767 | -0.98063 |        |        |        |        |
| H                                           | -0.43369 | -0.65131 | 0.57170  |        |        |        |        |
| H                                           | 1.67589  | 1.86849  | -0.50481 |        |        |        |        |
| O                                           | 1.86476  | 1.31053  | 0.25555  |        |        |        |        |
| H                                           | 3.04250  | -0.67869 | 1.34281  |        |        |        |        |
| O                                           | 1.31451  | -1.66608 | 1.67010  |        |        |        |        |
| Vibrational wavenumbers (cm <sup>-1</sup> ) |          |          |          |        |        |        |        |
| 73.3                                        | 121.4    | 156.8    | 221.3    | 254.9  | 381.0  | 389.2  | 415.4  |
| 556.4                                       | 649.7    | 746.6    | 846.2    | 922.2  | 1031.8 | 1089.0 | 1137.4 |
| 1220.0                                      | 1242.8   | 1273.0   | 1379.8   | 1393.1 | 1419.4 | 1523.6 | 1698.7 |
| 1859.8                                      | 2985.5   | 2994.6   | 3072.3   | 3655.8 | 3836.0 |        |        |
| Rotational Constants (GHz):                 |          |          |          | 5.6860 | 1.8663 | 1.4804 |        |



| M16a                                        |          |          |          |        |        |        |        |
|---------------------------------------------|----------|----------|----------|--------|--------|--------|--------|
| Cartesian Coordinates (Å)                   |          |          |          |        |        |        |        |
| N                                           | 0.00537  | 0.00024  | 0.00839  |        |        |        |        |
| C                                           | -0.60363 | -1.20771 | 0.31631  |        |        |        |        |
| N                                           | 0.01171  | -2.10401 | 1.06193  |        |        |        |        |
| C                                           | 1.20893  | -1.81923 | 1.49287  |        |        |        |        |
| C                                           | 1.45252  | -0.00552 | 0.01094  |        |        |        |        |
| H                                           | -1.61280 | -1.37336 | -0.02690 |        |        |        |        |
| H                                           | 1.87178  | -0.50970 | -0.86466 |        |        |        |        |
| H                                           | -0.38846 | 0.51662  | -0.76138 |        |        |        |        |
| H                                           | 1.59177  | 1.72865  | 0.76904  |        |        |        |        |
| O                                           | 1.95238  | 1.26821  | 0.00527  |        |        |        |        |
| H                                           | 1.75602  | -2.46820 | 2.15695  |        |        |        |        |
| O                                           | 1.89232  | -0.68109 | 1.17270  |        |        |        |        |
| Vibrational wavenumbers (cm <sup>-1</sup> ) |          |          |          |        |        |        |        |
| 144.2                                       | 226.3    | 339.7    | 421.7    | 504.8  | 549.4  | 591.8  | 620.4  |
| 669.5                                       | 679.5    | 702.3    | 923.4    | 964.6  | 1040.9 | 1088.8 | 1139.7 |
| 1195.0                                      | 1260.6   | 1335.7   | 1346.6   | 1365.2 | 1423.5 | 1445.3 | 1488.2 |
| 1531.8                                      | 3052.7   | 3231.1   | 3253.7   | 3633.5 | 3845.7 |        |        |
| Rotational Constants (GHz):                 |          |          |          | 5.6929 | 2.7370 | 1.9235 |        |

| M16s                                        |          |          |          |        |        |        |        |
|---------------------------------------------|----------|----------|----------|--------|--------|--------|--------|
| Cartesian Coordinates (Å)                   |          |          |          |        |        |        |        |
| N                                           | -0.02813 | -1.28533 | 1.96032  |        |        |        |        |
| C                                           | -0.59671 | -0.43465 | 1.06779  |        |        |        |        |
| N                                           | 0.06270  | 0.27413  | 0.23138  |        |        |        |        |
| C                                           | 1.48037  | 0.07516  | 0.21659  |        |        |        |        |
| C                                           | 1.35594  | -1.31340 | 2.09737  |        |        |        |        |
| H                                           | -1.67891 | -0.37335 | 1.09694  |        |        |        |        |
| H                                           | 1.75855  | -0.73961 | -0.45718 |        |        |        |        |
| H                                           | 1.76713  | -1.65658 | 3.03396  |        |        |        |        |
| H                                           | -0.60027 | -1.87243 | 2.53715  |        |        |        |        |
| H                                           | 1.56556  | 1.95301  | 0.02767  |        |        |        |        |
| O                                           | 2.00015  | -0.27806 | 1.52974  |        |        |        |        |
| O                                           | 2.13397  | 1.20815  | -0.18246 |        |        |        |        |
| Vibrational wavenumbers (cm <sup>-1</sup> ) |          |          |          |        |        |        |        |
| 126.5                                       | 257.0    | 290.6    | 379.1    | 438.0  | 493.8  | 524.4  | 600.0  |
| 634.6                                       | 675.7    | 894.0    | 954.8    | 964.3  | 982.3  | 1042.0 | 1163.8 |
| 1208.3                                      | 1242.0   | 1328.4   | 1358.2   | 1398.5 | 1435.4 | 1443.3 | 1531.6 |
| 1698.5                                      | 3057.5   | 3175.5   | 3226.9   | 3699.2 | 3867.5 |        |        |
| Rotational Constants (GHz):                 |          |          |          | 5.5608 | 2.7805 | 1.9338 |        |

| M17a                                        |          |          |          |         |        |        |        |
|---------------------------------------------|----------|----------|----------|---------|--------|--------|--------|
| Cartesian Coordinates (Å)                   |          |          |          |         |        |        |        |
| N                                           | -0.70731 | 0.01479  | -0.80028 |         |        |        |        |
| C                                           | -0.60714 | -0.02927 | 0.54025  |         |        |        |        |
| N                                           | 0.54437  | -0.02776 | 1.12745  |         |        |        |        |
| C                                           | 0.49716  | -0.00840 | 2.51592  |         |        |        |        |
| C                                           | 0.34749  | 0.14282  | -1.66700 |         |        |        |        |
| H                                           | -1.55381 | -0.06565 | 1.07533  |         |        |        |        |
| H                                           | 1.34234  | -0.02284 | -1.28115 |         |        |        |        |
| H                                           | -1.62680 | -0.00076 | -1.20971 |         |        |        |        |
| H                                           | 0.73740  | 0.05693  | -3.52756 |         |        |        |        |
| O                                           | 0.01499  | -0.17544 | -2.94421 |         |        |        |        |
| H                                           | 1.48165  | -0.20656 | 2.96351  |         |        |        |        |
| O                                           | -0.47044 | 0.21213  | 3.20746  |         |        |        |        |
| Vibrational wavenumbers (cm <sup>-1</sup> ) |          |          |          |         |        |        |        |
| 44.6                                        | 110.9    | 150.3    | 241.6    | 279.1   | 297.1  | 368.9  | 447.0  |
| 558.1                                       | 650.8    | 693.5    | 861.0    | 986.6   | 1036.5 | 1064.4 | 1143.2 |
| 1216.2                                      | 1261.2   | 1304.4   | 1364.1   | 1413.4  | 1435.2 | 1596.0 | 1639.3 |
| 1766.2                                      | 3012.2   | 3137.5   | 3224.5   | 3652.3  | 3919.8 |        |        |
| Rotational Constants (GHz):                 |          |          |          | 14.9127 | 1.0880 | 1.0183 |        |

| M17s                                        |          |          |          |        |        |        |        |
|---------------------------------------------|----------|----------|----------|--------|--------|--------|--------|
| Cartesian Coordinates (Å)                   |          |          |          |        |        |        |        |
| N                                           | -1.58457 | -0.00000 | -0.01798 |        |        |        |        |
| C                                           | -0.40340 | -0.00000 | 0.70747  |        |        |        |        |
| N                                           | 0.77900  | 0.00000  | 0.12529  |        |        |        |        |
| C                                           | 1.87845  | 0.00000  | 0.79846  |        |        |        |        |
| C                                           | -1.79263 | -0.00000 | -1.37651 |        |        |        |        |
| H                                           | -0.54434 | 0.00000  | 1.78529  |        |        |        |        |
| H                                           | 1.97351  | 0.00000  | 1.88125  |        |        |        |        |
| H                                           | -2.87433 | 0.00000  | -1.59653 |        |        |        |        |
| H                                           | -2.42365 | -0.00000 | 0.53478  |        |        |        |        |
| H                                           | 2.88139  | -0.00000 | -0.77561 |        |        |        |        |
| O                                           | -0.95261 | 0.00000  | -2.23721 |        |        |        |        |
| O                                           | 3.06326  | -0.00000 | 0.17130  |        |        |        |        |
| Vibrational wavenumbers (cm <sup>-1</sup> ) |          |          |          |        |        |        |        |
| 35.2                                        | 118.4    | 161.0    | 247.7    | 267.2  | 349.3  | 482.7  | 563.8  |
| 571.1                                       | 598.7    | 661.1    | 830.2    | 884.6  | 999.1  | 1003.0 | 1152.2 |
| 1178.9                                      | 1305.4   | 1329.6   | 1376.7   | 1433.7 | 1499.6 | 1565.5 | 1578.0 |
| 1814.3                                      | 2959.1   | 3124.2   | 3142.1   | 3668.2 | 3816.6 |        |        |
| Rotational Constants (GHz):                 |          |          |          | 6.3625 | 1.4237 | 1.1634 |        |

| M18a                                        |          |          |          |        |        |        |        |
|---------------------------------------------|----------|----------|----------|--------|--------|--------|--------|
| Cartesian Coordinates (Å)                   |          |          |          |        |        |        |        |
| N                                           | -0.92926 | 0.00000  | 1.00623  |        |        |        |        |
| C                                           | -0.71421 | -0.00000 | -0.32641 |        |        |        |        |
| N                                           | 0.52759  | 0.00001  | -0.77831 |        |        |        |        |
| C                                           | 0.68188  | 0.00000  | -2.14576 |        |        |        |        |
| C                                           | 0.01714  | 0.00000  | 1.96989  |        |        |        |        |
| H                                           | -1.58941 | -0.00001 | -0.96455 |        |        |        |        |
| H                                           | -0.28399 | 0.00001  | 3.00356  |        |        |        |        |
| H                                           | -1.88525 | 0.00001  | 1.31827  |        |        |        |        |
| H                                           | 1.35151  | -0.00002 | 0.65975  |        |        |        |        |
| O                                           | 1.29442  | -0.00001 | 1.67065  |        |        |        |        |
| H                                           | 1.73944  | 0.00002  | -2.44464 |        |        |        |        |
| O                                           | -0.20987 | -0.00001 | -2.96879 |        |        |        |        |
| Vibrational wavenumbers (cm <sup>-1</sup> ) |          |          |          |        |        |        |        |
| 85.3                                        | 174.2    | 190.9    | 282.1    | 319.0  | 467.8  | 468.7  | 511.2  |
| 696.9                                       | 770.0    | 854.7    | 889.3    | 983.7  | 1012.2 | 1038.4 | 1095.3 |
| 1219.5                                      | 1311.4   | 1341.7   | 1421.7   | 1494.4 | 1528.8 | 1571.3 | 1622.0 |
| 1740.6                                      | 2814.3   | 3015.2   | 3191.9   | 3268.2 | 3667.2 |        |        |
| Rotational Constants (GHz):                 |          |          |          | 7.7931 | 1.5545 | 1.2960 |        |

| M19a                                        |          |          |          |        |        |        |        |
|---------------------------------------------|----------|----------|----------|--------|--------|--------|--------|
| Cartesian Coordinates (Å)                   |          |          |          |        |        |        |        |
| N                                           | 0.11258  | -1.62343 | -0.19885 |        |        |        |        |
| C                                           | -0.64185 | -0.54229 | 0.19520  |        |        |        |        |
| N                                           | -0.12993 | 0.72287  | 0.11935  |        |        |        |        |
| C                                           | -0.84479 | 1.82199  | 0.49996  |        |        |        |        |
| C                                           | 1.38150  | -1.61528 | -0.68681 |        |        |        |        |
| H                                           | -1.63911 | -0.68882 | 0.56520  |        |        |        |        |
| H                                           | 1.74559  | -2.62326 | -0.92349 |        |        |        |        |
| H                                           | -0.32976 | -2.52177 | -0.11448 |        |        |        |        |
| H                                           | 0.81485  | 0.81046  | -0.23613 |        |        |        |        |
| O                                           | 2.05461  | -0.61110 | -0.84996 |        |        |        |        |
| H                                           | -0.27830 | 2.75405  | 0.37115  |        |        |        |        |
| O                                           | -1.97536 | 1.77600  | 0.93092  |        |        |        |        |
| Vibrational wavenumbers (cm <sup>-1</sup> ) |          |          |          |        |        |        |        |
| 74.0                                        | 111.5    | 172.1    | 250.7    | 331.9  | 380.3  | 412.0  | 435.5  |
| 615.6                                       | 762.8    | 784.2    | 868.7    | 969.9  | 991.0  | 1041.0 | 1107.6 |
| 1211.7                                      | 1285.5   | 1366.8   | 1427.1   | 1443.2 | 1559.4 | 1595.3 | 1741.5 |
| 1781.9                                      | 3025.3   | 3032.7   | 3299.0   | 3538.7 | 3670.9 |        |        |
| Rotational Constants (GHz):                 |          |          |          | 7.9506 | 1.4693 | 1.2401 |        |

---

**M20**

---

## Cartesian Coordinates (Å)

|   |          |          |          |
|---|----------|----------|----------|
| N | 0.03411  | -0.04857 | -0.20174 |
| C | -0.86130 | 0.96620  | -0.52645 |
| N | -0.65167 | 2.18182  | -0.79204 |
| C | 2.03536  | -1.24176 | 0.27127  |
| C | 1.38050  | -0.03753 | -0.07472 |
| H | -1.88112 | 0.58863  | -0.53582 |
| H | 3.13373  | -1.18564 | 0.36384  |
| H | 0.33138  | 2.42825  | -0.75538 |
| H | -0.34105 | -0.97062 | -0.02116 |
| H | 2.96002  | 0.99409  | -0.16503 |
| O | 2.01526  | 1.12104  | -0.28581 |
| O | 1.41435  | -2.29526 | 0.45900  |

---

Vibrational wavenumbers (cm<sup>-1</sup>)

|        |        |        |        |        |        |        |        |
|--------|--------|--------|--------|--------|--------|--------|--------|
| 67.6   | 183.7  | 199.6  | 275.1  | 278.2  | 396.6  | 433.8  | 519.7  |
| 614.8  | 697.6  | 781.0  | 856.6  | 879.8  | 889.7  | 1095.7 | 1115.7 |
| 1210.0 | 1247.1 | 1357.9 | 1408.7 | 1447.3 | 1513.0 | 1613.6 | 1668.0 |
| 1731.5 | 2955.5 | 3141.7 | 3564.3 | 3580.8 | 3858.5 |        |        |

---

Rotational Constants (GHz): 5.9734 1.7824 1.3727

---

---

**M21**

---

## Cartesian Coordinates (Å)

|   |          |          |          |
|---|----------|----------|----------|
| N | 0.05007  | 0.26130  | -0.00024 |
| C | -0.77070 | 0.49213  | -1.08570 |
| N | -0.45540 | 0.86506  | -2.25182 |
| C | 1.99255  | -0.57309 | 1.14503  |
| C | 1.46875  | 0.24739  | -0.07718 |
| H | -1.81967 | 0.31597  | -0.85520 |
| H | 0.54070  | 1.04210  | -2.35647 |
| H | 1.81292  | -0.23983 | -0.99244 |
| H | -0.37034 | -0.01558 | 0.86937  |
| H | 1.67544  | 2.03265  | 0.63549  |
| O | 2.07947  | 1.50333  | -0.05689 |
| O | 2.86849  | -1.34570 | 1.14226  |

---

Vibrational wavenumbers (cm<sup>-1</sup>)

|        |        |        |        |        |        |        |        |
|--------|--------|--------|--------|--------|--------|--------|--------|
| 49.2   | 97.7   | 165.5  | 179.8  | 281.7  | 352.6  | 388.1  | 423.1  |
| 448.1  | 581.9  | 699.1  | 853.4  | 892.5  | 1013.1 | 1079.0 | 1099.2 |
| 1184.9 | 1251.3 | 1266.2 | 1312.7 | 1426.5 | 1438.0 | 1524.1 | 1735.3 |
| 1986.8 | 3071.1 | 3133.0 | 3514.1 | 3658.3 | 3862.5 |        |        |

---

Rotational Constants (GHz): 5.8822 1.5375 1.3737

---

| P5                                          |          |          |          |        |        |        |        |
|---------------------------------------------|----------|----------|----------|--------|--------|--------|--------|
| Cartesian Coordinates (Å)                   |          |          |          |        |        |        |        |
| N                                           | -0.13412 | -0.06248 | -0.03011 |        |        |        |        |
| C                                           | -0.47014 | -0.84780 | 1.01178  |        |        |        |        |
| N                                           | 0.46352  | -1.16340 | 1.85451  |        |        |        |        |
| C                                           | 1.61436  | -0.55084 | 1.35962  |        |        |        |        |
| C                                           | 1.29627  | 0.10877  | -0.00750 |        |        |        |        |
| H                                           | -1.49415 | -1.18074 | 1.12456  |        |        |        |        |
| H                                           | 1.75412  | -0.46024 | -0.82450 |        |        |        |        |
| H                                           | -0.71561 | 0.09237  | -0.83170 |        |        |        |        |
| H                                           | 2.42346  | 1.53875  | 0.56914  |        |        |        |        |
| O                                           | 1.69201  | 1.44107  | -0.05003 |        |        |        |        |
| O                                           | 2.68706  | -0.45123 | 1.88838  |        |        |        |        |
| Vibrational wavenumbers (cm <sup>-1</sup> ) |          |          |          |        |        |        |        |
| 98.3                                        | 247.2    | 291.1    | 303.8    | 442.8  | 545.6  | 575.6  | 669.7  |
| 775.2                                       | 854.8    | 920.5    | 1020.9   | 1045.6 | 1128.0 | 1162.5 | 1197.8 |
| 1251.6                                      | 1347.2   | 1372.8   | 1390.1   | 1498.2 | 1616.1 | 1860.7 | 3026.8 |
| 3211.9                                      | 3704.0   | 3816.0   |          |        |        |        |        |
| Rotational Constants (GHz):                 |          |          |          | 3.9571 | 3.5955 | 1.9988 |        |

| E2-RO <sub>2</sub>                          |          |          |          |        |        |        |        |
|---------------------------------------------|----------|----------|----------|--------|--------|--------|--------|
| Cartesian Coordinates (Å)                   |          |          |          |        |        |        |        |
| N                                           | 1.78178  | -0.33107 | -0.25874 |        |        |        |        |
| C                                           | 0.53583  | -0.15853 | 0.27561  |        |        |        |        |
| N                                           | -0.48769 | -0.66672 | -0.26890 |        |        |        |        |
| C                                           | -1.74250 | -0.37881 | 0.32456  |        |        |        |        |
| C                                           | 2.93654  | 0.17707  | 0.29374  |        |        |        |        |
| H                                           | 0.51297  | 0.43969  | 1.18743  |        |        |        |        |
| H                                           | 2.75437  | 0.74387  | 1.22053  |        |        |        |        |
| H                                           | 1.86309  | -0.85415 | -1.11878 |        |        |        |        |
| H                                           | -2.41451 | -1.82456 | -0.68720 |        |        |        |        |
| O                                           | 4.02411  | 0.01951  | -0.18408 |        |        |        |        |
| H                                           | -1.71596 | -0.10644 | 1.38226  |        |        |        |        |
| O                                           | -2.63840 | -1.38061 | 0.13593  |        |        |        |        |
| O                                           | -2.30807 | 0.82115  | -0.35631 |        |        |        |        |
| O                                           | -1.63237 | 1.88341  | -0.05232 |        |        |        |        |
| Vibrational wavenumbers (cm <sup>-1</sup> ) |          |          |          |        |        |        |        |
| 52.7                                        | 104.3    | 113.2    | 135.8    | 181.6  | 296.0  | 313.3  | 342.7  |
| 393.9                                       | 403.9    | 495.6    | 601.4    | 642.7  | 669.9  | 725.1  | 886.6  |
| 1021.2                                      | 1048.1   | 1072.0   | 1200.3   | 1250.4 | 1276.8 | 1295.2 | 1332.0 |
| 1349.0                                      | 1368.2   | 1422.2   | 1450.3   | 1508.2 | 1761.1 | 1850.9 | 2997.2 |
| 3073.6                                      | 3106.9   | 3614.5   | 3851.8   |        |        |        |        |
| Rotational Constants (GHz):                 |          |          |          | 3.9609 | 0.6979 | 0.6143 |        |

| E4-RO <sub>2</sub>                          |          |          |          |        |        |        |        |
|---------------------------------------------|----------|----------|----------|--------|--------|--------|--------|
| Cartesian Coordinates (Å)                   |          |          |          |        |        |        |        |
| N                                           | 1.25142  | -0.67568 | -0.65350 |        |        |        |        |
| C                                           | 0.19991  | 0.02234  | -0.02016 |        |        |        |        |
| N                                           | -1.05080 | -0.53160 | -0.39395 |        |        |        |        |
| C                                           | -1.97987 | -0.45911 | 0.45964  |        |        |        |        |
| C                                           | 2.50337  | -0.77301 | -0.11979 |        |        |        |        |
| H                                           | 0.39280  | 0.10299  | 1.05076  |        |        |        |        |
| H                                           | 3.18353  | -1.35937 | -0.75696 |        |        |        |        |
| H                                           | 1.04449  | -1.11562 | -1.53344 |        |        |        |        |
| H                                           | -3.22809 | -1.20930 | -0.70476 |        |        |        |        |
| O                                           | 2.83891  | -0.29112 | 0.93152  |        |        |        |        |
| H                                           | -1.88861 | -0.05563 | 1.46590  |        |        |        |        |
| O                                           | -3.20572 | -0.89197 | 0.20613  |        |        |        |        |
| O                                           | 0.26905  | 1.42097  | -0.52249 |        |        |        |        |
| O                                           | -0.55836 | 2.18045  | 0.12140  |        |        |        |        |
| Vibrational wavenumbers (cm <sup>-1</sup> ) |          |          |          |        |        |        |        |
| 46.1                                        | 77.0     | 129.5    | 148.2    | 194.1  | 211.5  | 279.0  | 358.2  |
| 419.6                                       | 517.7    | 542.7    | 582.5    | 623.6  | 652.5  | 831.1  | 888.4  |
| 1038.0                                      | 1046.8   | 1112.0   | 1124.7   | 1231.9 | 1253.9 | 1273.6 | 1333.1 |
| 1358.4                                      | 1381.3   | 1428.4   | 1438.9   | 1542.5 | 1752.4 | 1824.9 | 2997.7 |
| 3093.3                                      | 3149.6   | 3666.3   | 3808.4   |        |        |        |        |
| Rotational Constants (GHz):                 |          |          |          | 2.7512 | 0.9686 | 0.7993 |        |

| Z2-RO <sub>2</sub>                          |          |          |          |        |        |        |        |
|---------------------------------------------|----------|----------|----------|--------|--------|--------|--------|
| Cartesian Coordinates (Å)                   |          |          |          |        |        |        |        |
| N                                           | 1.26795  | 0.25059  | 0.22390  |        |        |        |        |
| C                                           | 0.66836  | -0.85542 | -0.33001 |        |        |        |        |
| N                                           | -0.57200 | -1.12938 | -0.35601 |        |        |        |        |
| C                                           | -1.52299 | -0.31845 | 0.32113  |        |        |        |        |
| C                                           | 2.64244  | 0.40286  | 0.26390  |        |        |        |        |
| H                                           | 1.36835  | -1.54572 | -0.78657 |        |        |        |        |
| H                                           | 2.93685  | 1.38645  | 0.65828  |        |        |        |        |
| H                                           | 0.68283  | 1.03783  | 0.47983  |        |        |        |        |
| H                                           | -2.72517 | -1.64139 | -0.26310 |        |        |        |        |
| O                                           | 3.42952  | -0.43274 | -0.08286 |        |        |        |        |
| H                                           | -1.21870 | 0.05408  | 1.30260  |        |        |        |        |
| O                                           | -2.71307 | -0.96000 | 0.41627  |        |        |        |        |
| O                                           | -1.78067 | 0.92474  | -0.47683 |        |        |        |        |
| O                                           | -1.01612 | 1.90379  | -0.10613 |        |        |        |        |
| Vibrational wavenumbers (cm <sup>-1</sup> ) |          |          |          |        |        |        |        |
| 55.3                                        | 101.9    | 144.8    | 150.7    | 229.3  | 255.0  | 313.8  | 371.1  |
| 414.3                                       | 445.0    | 547.4    | 595.4    | 675.3  | 738.4  | 834.3  | 883.2  |
| 996.1                                       | 1036.7   | 1045.4   | 1117.1   | 1209.4 | 1251.9 | 1292.8 | 1327.7 |
| 1363.7                                      | 1399.4   | 1440.5   | 1449.5   | 1541.4 | 1744.2 | 1846.0 | 3014.8 |
| 3068.9                                      | 3196.3   | 3520.0   | 3841.2   |        |        |        |        |
| Rotational Constants (GHz):                 |          |          |          | 3.5166 | 0.9142 | 0.7594 |        |

| Z4-RO <sub>2</sub>                          |          |          |          |        |        |        |        |
|---------------------------------------------|----------|----------|----------|--------|--------|--------|--------|
| Cartesian Coordinates (Å)                   |          |          |          |        |        |        |        |
| N                                           | 1.43862  | -0.78440 | -0.18310 |        |        |        |        |
| C                                           | 0.13559  | -0.26151 | -0.06093 |        |        |        |        |
| N                                           | -0.76413 | -1.08876 | -0.78254 |        |        |        |        |
| C                                           | -2.01979 | -0.93032 | -0.66775 |        |        |        |        |
| C                                           | 2.41757  | -0.53764 | 0.73525  |        |        |        |        |
| H                                           | -0.11314 | -0.08841 | 0.98871  |        |        |        |        |
| H                                           | 3.35679  | -1.06084 | 0.49922  |        |        |        |        |
| H                                           | 1.60110  | -1.41606 | -0.94846 |        |        |        |        |
| H                                           | -2.11373 | 0.75327  | 0.20968  |        |        |        |        |
| O                                           | 2.27805  | 0.16513  | 1.70309  |        |        |        |        |
| H                                           | -2.67652 | -1.65194 | -1.14164 |        |        |        |        |
| O                                           | -2.69915 | 0.00692  | -0.02901 |        |        |        |        |
| O                                           | 0.19684  | 1.12139  | -0.64604 |        |        |        |        |
| O                                           | -0.76454 | 1.87085  | -0.20941 |        |        |        |        |
| Vibrational wavenumbers (cm <sup>-1</sup> ) |          |          |          |        |        |        |        |
| 55.7                                        | 100.2    | 126.4    | 190.7    | 230.1  | 248.7  | 303.3  | 393.2  |
| 431.1                                       | 514.6    | 561.2    | 597.2    | 755.6  | 786.5  | 812.1  | 869.3  |
| 1030.8                                      | 1047.5   | 1066.1   | 1126.2   | 1238.7 | 1249.8 | 1291.8 | 1329.3 |
| 1381.6                                      | 1406.8   | 1433.1   | 1464.7   | 1532.8 | 1732.7 | 1824.0 | 3003.0 |
| 3078.2                                      | 3188.0   | 3511.4   | 3664.3   |        |        |        |        |
| Rotational Constants (GHz):                 |          |          |          | 3.0316 | 1.0776 | 0.9192 |        |

| TS25                                        |          |          |          |        |        |        |        |
|---------------------------------------------|----------|----------|----------|--------|--------|--------|--------|
| Cartesian Coordinates (Å)                   |          |          |          |        |        |        |        |
| N                                           | -1.09142 | -0.29686 | 0.20363  |        |        |        |        |
| C                                           | -0.13216 | 0.31811  | 0.97096  |        |        |        |        |
| N                                           | 1.07468  | -0.13998 | 1.25093  |        |        |        |        |
| C                                           | 1.77875  | -0.72186 | 0.33025  |        |        |        |        |
| C                                           | -2.39030 | 0.14945  | 0.12988  |        |        |        |        |
| H                                           | -0.53632 | 1.06541  | 1.64444  |        |        |        |        |
| H                                           | -2.59449 | 0.99000  | 0.81209  |        |        |        |        |
| H                                           | -0.81609 | -1.03615 | -0.42613 |        |        |        |        |
| H                                           | 1.90340  | -1.78391 | -1.25756 |        |        |        |        |
| O                                           | -3.21918 | -0.33299 | -0.59140 |        |        |        |        |
| H                                           | 2.84421  | -0.84502 | 0.49075  |        |        |        |        |
| O                                           | 1.23711  | -1.52395 | -0.61831 |        |        |        |        |
| O                                           | 1.75649  | 1.03847  | -0.82568 |        |        |        |        |
| O                                           | 0.69792  | 1.59263  | -0.46862 |        |        |        |        |
| Vibrational wavenumbers (cm <sup>-1</sup> ) |          |          |          |        |        |        |        |
| 257.1 <i>i</i>                              | 75.3     | 136.6    | 157.6    | 193.8  | 218.5  | 289.3  | 319.0  |
| 333.2                                       | 388.0    | 444.4    | 571.8    | 590.8  | 627.5  | 741.8  | 793.6  |
| 966.9                                       | 1001.7   | 1047.9   | 1085.4   | 1198.0 | 1249.9 | 1279.6 | 1305.4 |
| 1361.4                                      | 1406.8   | 1446.0   | 1465.7   | 1590.0 | 1622.5 | 1838.0 | 2995.2 |
| 3176.3                                      | 3182.3   | 3621.5   | 3884.0   |        |        |        |        |
| Rotational Constants (GHz):                 |          |          |          | 2.8125 | 1.0683 | 0.9716 |        |

---

**TS26**

---

## Cartesian Coordinates (Å)

|   |          |          |          |
|---|----------|----------|----------|
| N | -1.48771 | -0.47909 | -0.21636 |
| C | -0.27673 | -0.27123 | 0.38183  |
| N | 0.77987  | -0.88775 | -0.10505 |
| C | 1.92828  | -0.48197 | 0.39004  |
| C | -2.68654 | -0.04146 | 0.29366  |
| H | -0.33533 | 0.10966  | 1.39880  |
| H | -2.58057 | 0.44700  | 1.27538  |
| H | -1.49355 | -0.90454 | -1.13162 |
| H | 2.85051  | -1.24520 | -1.03379 |
| O | -3.73806 | -0.18128 | -0.26650 |
| H | 2.07292  | -0.13246 | 1.40771  |
| O | 3.05994  | -0.87716 | -0.16761 |
| O | 1.62871  | 1.47137  | -0.16101 |
| O | 0.38077  | 1.59475  | -0.16236 |

---

Vibrational wavenumbers (cm<sup>-1</sup>)

|                |        |        |        |        |        |        |        |
|----------------|--------|--------|--------|--------|--------|--------|--------|
| 227.0 <i>i</i> | 74.4   | 119.4  | 157.7  | 199.8  | 213.5  | 309.0  | 389.5  |
| 402.8          | 432.7  | 494.0  | 524.2  | 621.7  | 637.2  | 685.7  | 712.5  |
| 989.3          | 1044.0 | 1072.2 | 1170.0 | 1231.6 | 1290.4 | 1316.4 | 1330.2 |
| 1381.9         | 1392.4 | 1406.3 | 1462.9 | 1588.5 | 1628.4 | 1842.3 | 2995.6 |
| 3125.7         | 3156.4 | 3621.5 | 3817.9 |        |        |        |        |

---

Rotational Constants (GHz):            4.0614    0.8060    0.7019

---

---

**TS27**

---

## Cartesian Coordinates (Å)

|   |          |          |          |
|---|----------|----------|----------|
| N | -1.47112 | -0.31486 | -0.38532 |
| C | -0.18131 | -0.40097 | 0.05563  |
| N | 0.74293  | -0.77570 | -0.81517 |
| C | 1.97414  | -0.66042 | -0.41195 |
| C | -2.55422 | -0.10267 | 0.43300  |
| H | -0.07218 | -0.47564 | 1.13259  |
| H | -2.28310 | -0.07082 | 1.50013  |
| H | -1.62762 | -0.32495 | -1.38268 |
| H | 3.25008  | -0.66048 | 1.00104  |
| O | -3.67733 | 0.02734  | 0.03071  |
| H | 2.77166  | -0.70880 | -1.14482 |
| O | 2.32290  | -0.86642 | 0.86960  |
| O | 1.74820  | 1.44134  | -0.21341 |
| O | 0.55959  | 1.50511  | 0.16773  |

---

Vibrational wavenumbers (cm<sup>-1</sup>)

|                |        |        |        |        |        |        |        |
|----------------|--------|--------|--------|--------|--------|--------|--------|
| 237.6 <i>i</i> | 77.5   | 125.2  | 159.0  | 203.4  | 217.5  | 291.6  | 300.4  |
| 380.5          | 429.0  | 442.9  | 548.1  | 575.1  | 620.9  | 719.2  | 777.2  |
| 965.6          | 1026.3 | 1049.6 | 1127.2 | 1230.9 | 1257.7 | 1273.1 | 1309.9 |
| 1347.3         | 1399.6 | 1424.3 | 1464.8 | 1603.3 | 1612.8 | 1840.4 | 2997.1 |
| 3161.2         | 3182.6 | 3617.7 | 3891.8 |        |        |        |        |

---

Rotational Constants (GHz):            3.6994    0.8667    0.7822

---



| TS28                                        |          |          |          |        |        |        |        |
|---------------------------------------------|----------|----------|----------|--------|--------|--------|--------|
| Cartesian Coordinates (Å)                   |          |          |          |        |        |        |        |
| N                                           | 1.17368  | -0.52906 | 0.52410  |        |        |        |        |
| C                                           | 0.39823  | -0.38601 | -0.61362 |        |        |        |        |
| N                                           | -0.85905 | -0.74212 | -0.72876 |        |        |        |        |
| C                                           | -1.66326 | -0.53884 | 0.29238  |        |        |        |        |
| C                                           | 2.53402  | -0.30523 | 0.52794  |        |        |        |        |
| H                                           | 0.99075  | -0.27244 | -1.51074 |        |        |        |        |
| H                                           | 2.97408  | -0.45294 | 1.52604  |        |        |        |        |
| H                                           | 0.73876  | -0.73881 | 1.40526  |        |        |        |        |
| H                                           | -3.13275 | -0.70275 | -0.83137 |        |        |        |        |
| O                                           | 3.17574  | 0.00152  | -0.43801 |        |        |        |        |
| H                                           | -1.40771 | -0.60106 | 1.34707  |        |        |        |        |
| O                                           | -2.96893 | -0.68429 | 0.11928  |        |        |        |        |
| O                                           | -1.27181 | 1.44984  | 0.34549  |        |        |        |        |
| O                                           | -0.18243 | 1.61377  | -0.24474 |        |        |        |        |
| Vibrational wavenumbers (cm <sup>-1</sup> ) |          |          |          |        |        |        |        |
| 244.2 <i>i</i>                              | 55.6     | 120.9    | 139.6    | 203.8  | 232.8  | 246.6  | 347.6  |
| 394.0                                       | 444.1    | 516.7    | 535.8    | 585.4  | 646.3  | 677.4  | 829.3  |
| 993.4                                       | 1023.9   | 1036.8   | 1082.2   | 1146.5 | 1222.7 | 1291.8 | 1372.2 |
| 1394.6                                      | 1402.1   | 1440.7   | 1477.6   | 1579.9 | 1609.6 | 1839.5 | 3001.7 |
| 3133.1                                      | 3226.0   | 3668.3   | 3807.3   |        |        |        |        |
| Rotational Constants (GHz):                 |          |          |          | 3.6663 | 0.9567 | 0.8489 |        |

| TS29e                                       |          |          |          |        |        |        |        |
|---------------------------------------------|----------|----------|----------|--------|--------|--------|--------|
| Cartesian Coordinates (Å)                   |          |          |          |        |        |        |        |
| N                                           | 1.12289  | 0.65537  | 0.55247  |        |        |        |        |
| C                                           | -0.18190 | 0.55418  | 0.98340  |        |        |        |        |
| N                                           | -0.83990 | -0.56790 | 1.03341  |        |        |        |        |
| C                                           | -1.19645 | -1.40518 | 0.11128  |        |        |        |        |
| C                                           | 1.88935  | -0.28536 | -0.11159 |        |        |        |        |
| H                                           | -0.46568 | 1.33865  | 1.67360  |        |        |        |        |
| H                                           | 2.89061  | 0.11325  | -0.33709 |        |        |        |        |
| H                                           | 1.54051  | 1.56391  | 0.66226  |        |        |        |        |
| H                                           | -1.30840 | -0.04099 | -1.37059 |        |        |        |        |
| O                                           | 1.54855  | -1.39753 | -0.39638 |        |        |        |        |
| H                                           | -1.36317 | -2.43449 | 0.41740  |        |        |        |        |
| O                                           | -1.46053 | -1.13320 | -1.09755 |        |        |        |        |
| O                                           | -0.96761 | 1.81902  | -0.49898 |        |        |        |        |
| O                                           | -1.20825 | 1.22029  | -1.62146 |        |        |        |        |
| Vibrational wavenumbers (cm <sup>-1</sup> ) |          |          |          |        |        |        |        |
| 736.5 <i>i</i>                              | 53.8     | 77.4     | 121.1    | 189.3  | 220.5  | 241.5  | 283.2  |
| 325.5                                       | 366.3    | 521.2    | 576.0    | 621.7  | 692.2  | 866.3  | 894.7  |
| 995.7                                       | 1034.7   | 1048.9   | 1070.6   | 1142.6 | 1248.2 | 1279.8 | 1329.0 |
| 1400.1                                      | 1433.0   | 1466.5   | 1533.4   | 1613.7 | 1712.5 | 1783.9 | 1865.4 |
| 3000.0                                      | 3166.9   | 3187.2   | 3656.3   |        |        |        |        |
| Rotational Constants (GHz):                 |          |          |          | 2.0198 | 1.5617 | 1.2578 |        |

| TS29z                                       |          |          |          |        |        |        |        |
|---------------------------------------------|----------|----------|----------|--------|--------|--------|--------|
| Cartesian Coordinates (Å)                   |          |          |          |        |        |        |        |
| N                                           | 1.38514  | -0.60442 | -0.19259 |        |        |        |        |
| C                                           | 0.11271  | -0.48959 | 0.26229  |        |        |        |        |
| N                                           | -0.78597 | -1.34597 | -0.21204 |        |        |        |        |
| C                                           | -2.06852 | -1.20003 | -0.02425 |        |        |        |        |
| C                                           | 2.46338  | 0.06685  | 0.35416  |        |        |        |        |
| H                                           | 0.00937  | -0.07640 | 1.26195  |        |        |        |        |
| H                                           | 2.19444  | 0.65448  | 1.24491  |        |        |        |        |
| H                                           | 1.53959  | -1.13305 | -1.03884 |        |        |        |        |
| H                                           | -2.10500 | 0.84088  | 0.16698  |        |        |        |        |
| O                                           | 3.57017  | 0.00235  | -0.09602 |        |        |        |        |
| H                                           | -2.67244 | -2.10177 | -0.10744 |        |        |        |        |
| O                                           | -2.71415 | -0.13152 | 0.19826  |        |        |        |        |
| O                                           | -0.23631 | 1.40814  | -0.35842 |        |        |        |        |
| O                                           | -1.39541 | 1.87169  | -0.02487 |        |        |        |        |
| Vibrational wavenumbers (cm <sup>-1</sup> ) |          |          |          |        |        |        |        |
| 837.0 <i>i</i>                              | 64.2     | 85.4     | 123.2    | 190.9  | 213.4  | 269.6  | 306.2  |
| 326.4                                       | 427.7    | 481.0    | 548.9    | 618.5  | 698.3  | 760.7  | 833.6  |
| 1040.8                                      | 1056.8   | 1114.9   | 1168.1   | 1217.1 | 1257.7 | 1309.8 | 1333.8 |
| 1342.3                                      | 1402.9   | 1435.5   | 1486.0   | 1609.9 | 1692.3 | 1749.8 | 1854.1 |
| 3011.4                                      | 3139.1   | 3148.4   | 3617.9   |        |        |        |        |
| Rotational Constants (GHz):                 |          |          |          | 3.2362 | 0.9306 | 0.7453 |        |

| TS30e                                       |          |          |          |        |        |        |        |
|---------------------------------------------|----------|----------|----------|--------|--------|--------|--------|
| Cartesian Coordinates (Å)                   |          |          |          |        |        |        |        |
| N                                           | 0.57829  | 0.21773  | -0.37538 |        |        |        |        |
| C                                           | 0.04841  | 0.08657  | 0.86157  |        |        |        |        |
| N                                           | -0.94872 | -0.79335 | 1.17780  |        |        |        |        |
| C                                           | -1.35460 | -1.66954 | 0.33158  |        |        |        |        |
| C                                           | 1.90268  | 0.66838  | -0.45705 |        |        |        |        |
| H                                           | 0.60409  | 0.47943  | 1.70441  |        |        |        |        |
| H                                           | 2.13419  | 1.10009  | -1.44197 |        |        |        |        |
| H                                           | -0.21465 | 1.11553  | -0.86200 |        |        |        |        |
| H                                           | -0.22771 | -1.24666 | -1.09481 |        |        |        |        |
| O                                           | 2.72219  | 0.56518  | 0.41206  |        |        |        |        |
| H                                           | -2.14231 | -2.35262 | 0.63135  |        |        |        |        |
| O                                           | -0.93001 | -1.90092 | -0.88999 |        |        |        |        |
| O                                           | -1.15127 | 1.75772  | 0.62544  |        |        |        |        |
| O                                           | -1.02039 | 1.97248  | -0.62303 |        |        |        |        |
| Vibrational wavenumbers (cm <sup>-1</sup> ) |          |          |          |        |        |        |        |
| 1013.3 <i>i</i>                             | 66.1     | 84.6     | 136.8    | 173.2  | 208.0  | 218.2  | 304.4  |
| 342.7                                       | 483.4    | 535.0    | 591.4    | 669.6  | 790.4  | 839.2  | 872.5  |
| 1032.2                                      | 1045.6   | 1057.3   | 1105.4   | 1150.0 | 1230.1 | 1276.3 | 1345.0 |
| 1362.1                                      | 1401.3   | 1432.3   | 1464.4   | 1515.7 | 1681.2 | 1823.1 | 1836.1 |
| 3010.8                                      | 3187.2   | 3195.2   | 3446.4   |        |        |        |        |
| Rotational Constants (GHz):                 |          |          |          | 1.9377 | 1.3717 | 1.0249 |        |

| TS30z                                       |          |          |          |        |        |        |        |
|---------------------------------------------|----------|----------|----------|--------|--------|--------|--------|
| Cartesian Coordinates (Å)                   |          |          |          |        |        |        |        |
| N                                           | 1.03607  | -0.14426 | 0.70138  |        |        |        |        |
| C                                           | -0.21490 | -0.19805 | 1.11284  |        |        |        |        |
| N                                           | -1.09119 | -1.14716 | 0.74092  |        |        |        |        |
| C                                           | -1.93094 | -1.03739 | -0.20659 |        |        |        |        |
| C                                           | 1.58504  | -1.14293 | -0.11242 |        |        |        |        |
| H                                           | -0.50689 | 0.47147  | 1.91375  |        |        |        |        |
| H                                           | 1.16039  | -2.14162 | 0.07141  |        |        |        |        |
| H                                           | 1.26194  | 0.95796  | 0.40661  |        |        |        |        |
| H                                           | -1.48283 | 0.72187  | -0.76256 |        |        |        |        |
| O                                           | 2.47444  | -0.93510 | -0.88345 |        |        |        |        |
| H                                           | -2.60069 | -1.86057 | -0.42524 |        |        |        |        |
| O                                           | -2.10199 | -0.00727 | -0.99720 |        |        |        |        |
| O                                           | -0.45074 | 1.94449  | -0.03673 |        |        |        |        |
| O                                           | 0.81813  | 2.14303  | -0.09050 |        |        |        |        |
| Vibrational wavenumbers (cm <sup>-1</sup> ) |          |          |          |        |        |        |        |
| 614.3 <i>i</i>                              | 41.0     | 118.6    | 125.3    | 148.9  | 176.8  | 217.4  | 253.0  |
| 383.5                                       | 388.8    | 470.7    | 584.5    | 670.0  | 708.5  | 827.9  | 878.8  |
| 980.1                                       | 1041.6   | 1056.1   | 1068.0   | 1182.8 | 1267.9 | 1282.2 | 1344.9 |
| 1395.3                                      | 1419.1   | 1454.2   | 1492.4   | 1618.0 | 1753.0 | 1810.5 | 1905.9 |
| 3006.7                                      | 3182.7   | 3204.3   | 3395.4   |        |        |        |        |
| Rotational Constants (GHz):                 |          |          |          | 1.8811 | 1.3837 | 0.9960 |        |

| TS31                                        |          |          |          |        |        |        |        |
|---------------------------------------------|----------|----------|----------|--------|--------|--------|--------|
| Cartesian Coordinates (Å)                   |          |          |          |        |        |        |        |
| N                                           | 1.41179  | -0.37224 | 0.18138  |        |        |        |        |
| C                                           | 0.88346  | 0.87187  | -0.04560 |        |        |        |        |
| N                                           | -0.29832 | 1.27866  | 0.21370  |        |        |        |        |
| C                                           | -1.26156 | 0.44554  | 0.76075  |        |        |        |        |
| C                                           | 2.73712  | -0.67599 | -0.06752 |        |        |        |        |
| H                                           | 1.59260  | 1.56958  | -0.47731 |        |        |        |        |
| H                                           | 2.96934  | -1.72586 | 0.16461  |        |        |        |        |
| H                                           | 0.78203  | -1.08295 | 0.52764  |        |        |        |        |
| H                                           | -1.98404 | -1.17590 | 0.04466  |        |        |        |        |
| O                                           | 3.54817  | 0.10124  | -0.48778 |        |        |        |        |
| H                                           | -1.91496 | 0.96206  | 1.46319  |        |        |        |        |
| O                                           | -1.15191 | -0.83371 | 0.85663  |        |        |        |        |
| O                                           | -2.56395 | 0.44482  | -0.62680 |        |        |        |        |
| O                                           | -2.75648 | -0.80491 | -0.78883 |        |        |        |        |
| Vibrational wavenumbers (cm <sup>-1</sup> ) |          |          |          |        |        |        |        |
| 909.3 <i>i</i>                              | 32.3     | 89.1     | 133.3    | 166.4  | 239.4  | 256.0  | 275.0  |
| 402.6                                       | 475.0    | 615.8    | 684.3    | 719.1  | 775.0  | 783.9  | 831.8  |
| 1030.0                                      | 1045.3   | 1079.4   | 1091.2   | 1098.6 | 1136.6 | 1239.5 | 1362.1 |
| 1373.4                                      | 1394.2   | 1440.8   | 1502.1   | 1561.6 | 1720.2 | 1843.1 | 1928.3 |
| 3012.0                                      | 3113.7   | 3190.7   | 3581.8   |        |        |        |        |
| Rotational Constants (GHz):                 |          |          |          | 4.2771 | 0.7668 | 0.7302 |        |

---

**TS32**

---

## Cartesian Coordinates (Å)

|   |          |          |          |
|---|----------|----------|----------|
| N | 1.10408  | 0.16492  | 0.05045  |
| C | 0.61709  | -1.05257 | -0.09538 |
| N | -0.65659 | -1.35038 | -0.18115 |
| C | -1.60753 | -0.65030 | 0.38241  |
| C | 2.49436  | 0.32907  | 0.08003  |
| H | 1.32759  | -1.86690 | -0.20285 |
| H | 2.77514  | 1.38010  | 0.23475  |
| H | 0.37684  | 1.16903  | 0.10803  |
| H | -2.87761 | -1.34403 | -0.78402 |
| O | 3.30427  | -0.54654 | -0.05023 |
| H | -1.49316 | -0.16822 | 1.34556  |
| O | -2.85428 | -0.84241 | 0.03995  |
| O | -1.53918 | 1.46503  | -0.26762 |
| O | -0.44391 | 2.09531  | 0.02928  |

Vibrational wavenumbers (cm<sup>-1</sup>)

|                 |        |        |        |        |        |        |        |
|-----------------|--------|--------|--------|--------|--------|--------|--------|
| 1013.5 <i>i</i> | 67.7   | 91.5   | 123.2  | 166.2  | 207.8  | 241.1  | 266.9  |
| 292.0           | 389.1  | 417.1  | 484.7  | 560.7  | 672.5  | 718.3  | 872.4  |
| 1032.0          | 1049.9 | 1072.1 | 1113.4 | 1164.0 | 1253.1 | 1280.0 | 1317.8 |
| 1366.3          | 1400.1 | 1423.5 | 1454.9 | 1588.6 | 1672.9 | 1790.8 | 1853.8 |
| 3027.3          | 3173.9 | 3195.4 | 3808.4 |        |        |        |        |

---

Rotational Constants (GHz): 2.7918 0.9990 0.7492

---

---

**TS33**

---

## Cartesian Coordinates (Å)

|   |          |          |          |
|---|----------|----------|----------|
| N | -1.92057 | -0.21499 | 0.33656  |
| C | -0.68001 | 0.31921  | 0.16337  |
| N | 0.27464  | 0.02404  | 0.94943  |
| C | 1.51571  | 0.59360  | 0.65675  |
| C | -3.01113 | 0.09304  | -0.44997 |
| H | -0.57868 | 1.00942  | -0.67444 |
| H | -2.77484 | 0.81988  | -1.24283 |
| H | -2.05494 | -0.87476 | 1.08987  |
| H | 2.47901  | 0.39319  | -0.97759 |
| O | -4.09841 | -0.38206 | -0.28602 |
| H | 2.09877  | 0.82559  | 1.54711  |
| O | 1.76445  | 1.20491  | -0.43292 |
| O | 2.53173  | -0.98996 | 0.25245  |
| O | 2.97784  | -0.69185 | -0.90414 |

Vibrational wavenumbers (cm<sup>-1</sup>)

|                |        |        |        |        |        |        |        |
|----------------|--------|--------|--------|--------|--------|--------|--------|
| 901.9 <i>i</i> | 46.6   | 103.6  | 120.4  | 124.2  | 211.3  | 275.4  | 306.2  |
| 324.0          | 476.4  | 595.9  | 606.6  | 675.7  | 721.3  | 744.6  | 807.7  |
| 1036.1         | 1052.4 | 1071.3 | 1101.0 | 1126.9 | 1237.3 | 1305.0 | 1344.7 |
| 1363.1         | 1376.4 | 1429.7 | 1499.7 | 1585.0 | 1730.3 | 1851.1 | 1918.6 |
| 3001.3         | 3117.4 | 3120.9 | 3609.1 |        |        |        |        |

---

Rotational Constants (GHz): 4.7907 0.6109 0.6023

---

| TS34e                                       |          |          |          |        |        |        |        |
|---------------------------------------------|----------|----------|----------|--------|--------|--------|--------|
| Cartesian Coordinates (Å)                   |          |          |          |        |        |        |        |
| N                                           | 1.06928  | -0.07365 | -0.59989 |        |        |        |        |
| C                                           | 0.29039  | -0.52057 | 0.37216  |        |        |        |        |
| N                                           | -0.98008 | -0.90660 | 0.14517  |        |        |        |        |
| C                                           | -2.05394 | -0.25351 | 0.16493  |        |        |        |        |
| C                                           | 2.44892  | -0.17886 | -0.41037 |        |        |        |        |
| H                                           | 0.74204  | -0.85682 | 1.30060  |        |        |        |        |
| H                                           | 3.00624  | 0.57210  | -0.98767 |        |        |        |        |
| H                                           | 0.71982  | 1.06112  | -0.79662 |        |        |        |        |
| H                                           | -3.09435 | -1.73455 | -0.32145 |        |        |        |        |
| O                                           | 2.98631  | -1.01455 | 0.26304  |        |        |        |        |
| H                                           | -2.12320 | 0.80129  | 0.41063  |        |        |        |        |
| O                                           | -3.22599 | -0.80332 | -0.10771 |        |        |        |        |
| O                                           | -0.08175 | 1.73480  | 0.85579  |        |        |        |        |
| O                                           | 0.29611  | 2.17334  | -0.28871 |        |        |        |        |
| Vibrational wavenumbers (cm <sup>-1</sup> ) |          |          |          |        |        |        |        |
| 883.1 <i>i</i>                              | 55.6     | 88.2     | 108.1    | 163.5  | 187.9  | 211.8  | 225.5  |
| 285.7                                       | 370.0    | 456.2    | 500.5    | 600.6  | 640.3  | 705.0  | 832.4  |
| 1004.5                                      | 1046.2   | 1056.2   | 1098.6   | 1136.9 | 1255.9 | 1285.6 | 1342.5 |
| 1366.7                                      | 1396.3   | 1427.6   | 1442.5   | 1591.4 | 1789.8 | 1816.8 | 1841.0 |
| 3024.4                                      | 3171.2   | 3187.5   | 3813.8   |        |        |        |        |
| Rotational Constants (GHz):                 |          |          |          | 2.5573 | 0.9811 | 0.7657 |        |

| TS34z                                       |          |          |          |        |        |        |        |
|---------------------------------------------|----------|----------|----------|--------|--------|--------|--------|
| Cartesian Coordinates (Å)                   |          |          |          |        |        |        |        |
| N                                           | 1.10476  | -0.27730 | 0.69889  |        |        |        |        |
| C                                           | -0.13865 | 0.14050  | 0.77887  |        |        |        |        |
| N                                           | -1.16835 | -0.50334 | 0.13575  |        |        |        |        |
| C                                           | -2.29314 | 0.08952  | 0.11065  |        |        |        |        |
| C                                           | 1.43510  | -1.46180 | 0.03475  |        |        |        |        |
| H                                           | -0.37261 | 0.87997  | 1.53894  |        |        |        |        |
| H                                           | 0.68181  | -2.25640 | 0.13444  |        |        |        |        |
| H                                           | 1.73099  | 0.71518  | 0.31444  |        |        |        |        |
| H                                           | -3.11034 | -1.30824 | -0.80939 |        |        |        |        |
| O                                           | 2.47919  | -1.61932 | -0.53112 |        |        |        |        |
| H                                           | -2.49352 | 1.08032  | 0.51633  |        |        |        |        |
| O                                           | -3.35519 | -0.44583 | -0.44926 |        |        |        |        |
| O                                           | 0.42994  | 1.96914  | -0.35966 |        |        |        |        |
| O                                           | 1.69467  | 1.81406  | -0.29532 |        |        |        |        |
| Vibrational wavenumbers (cm <sup>-1</sup> ) |          |          |          |        |        |        |        |
| 1051.4 <i>i</i>                             | 47.3     | 88.3     | 104.2    | 122.0  | 163.9  | 206.1  | 216.8  |
| 320.1                                       | 441.3    | 484.0    | 563.3    | 623.7  | 651.4  | 685.2  | 791.9  |
| 994.3                                       | 1044.4   | 1052.5   | 1094.7   | 1189.3 | 1247.2 | 1285.7 | 1365.0 |
| 1387.0                                      | 1392.9   | 1414.7   | 1459.8   | 1624.9 | 1716.6 | 1785.7 | 1856.3 |
| 3015.7                                      | 3138.4   | 3142.6   | 3791.8   |        |        |        |        |
| Rotational Constants (GHz):                 |          |          |          | 2.2083 | 1.0104 | 0.7534 |        |

---

**TS35**

---

## Cartesian Coordinates (Å)

|   |          |          |          |
|---|----------|----------|----------|
| N | 1.38608  | -0.73082 | -0.48145 |
| C | 0.13468  | -0.25179 | -0.05538 |
| N | -0.87421 | -1.20697 | -0.35813 |
| C | -2.05574 | -0.99724 | 0.22595  |
| C | 2.56498  | -0.30555 | 0.06783  |
| H | 0.18375  | 0.12076  | 0.96986  |
| H | 3.43747  | -0.81178 | -0.37238 |
| H | 1.38321  | -1.43484 | -1.20000 |
| H | -1.60589 | 1.19543  | 0.34815  |
| O | 2.64903  | 0.51885  | 0.93929  |
| H | -2.77543 | -1.81109 | 0.11399  |
| O | -2.39291 | 0.03549  | 0.83881  |
| O | -0.21746 | 0.88007  | -0.90937 |
| O | -1.04736 | 1.76978  | -0.29535 |

Vibrational wavenumbers (cm<sup>-1</sup>)

|                |        |        |        |        |        |        |        |
|----------------|--------|--------|--------|--------|--------|--------|--------|
| 474.2 <i>i</i> | 59.3   | 114.5  | 174.2  | 211.2  | 238.9  | 334.5  | 360.0  |
| 429.4          | 467.3  | 542.1  | 561.1  | 696.7  | 802.7  | 829.1  | 864.5  |
| 995.2          | 1046.4 | 1047.1 | 1085.4 | 1123.7 | 1256.4 | 1297.7 | 1332.7 |
| 1391.2         | 1413.2 | 1434.5 | 1460.2 | 1532.3 | 1652.2 | 1827.8 | 2408.9 |
| 3005.2         | 3090.3 | 3101.8 | 3659.8 |        |        |        |        |

---

Rotational Constants (GHz): 3.0757 1.0935 0.9537

---

---

**TS36**

---

## Cartesian Coordinates (Å)

|   |          |          |          |
|---|----------|----------|----------|
| N | 1.47126  | 0.92322  | 0.30875  |
| C | 0.48011  | 0.13651  | 0.87088  |
| N | -0.55664 | -0.19244 | 0.29013  |
| C | -1.64799 | -0.62207 | -0.36164 |
| C | 2.61413  | 1.30708  | 0.96993  |
| H | 0.71132  | -0.15620 | 1.90091  |
| H | 2.66014  | 0.92584  | 2.00258  |
| H | 1.35627  | 1.22835  | -0.64721 |
| H | -2.45413 | -2.20851 | -0.97331 |
| O | 3.47299  | 1.98579  | 0.47913  |
| H | -2.51769 | 0.00283  | -0.13391 |
| O | -1.87906 | -1.96283 | -0.23484 |
| O | -1.44444 | -0.33828 | -1.87606 |
| O | -2.26637 | -1.02971 | -2.59522 |

Vibrational wavenumbers (cm<sup>-1</sup>)

|                |        |        |        |        |        |        |        |
|----------------|--------|--------|--------|--------|--------|--------|--------|
| 223.2 <i>i</i> | 55.0   | 72.7   | 119.9  | 134.3  | 177.7  | 259.9  | 312.1  |
| 391.8          | 399.8  | 487.4  | 572.8  | 605.0  | 649.4  | 717.7  | 736.3  |
| 994.6          | 1032.9 | 1048.5 | 1164.1 | 1215.3 | 1255.1 | 1264.1 | 1293.8 |
| 1323.4         | 1353.9 | 1442.7 | 1460.8 | 1558.2 | 1837.2 | 2002.4 | 2992.8 |
| 3041.7         | 3047.0 | 3611.6 | 3748.5 |        |        |        |        |

---

Rotational Constants (GHz): 4.5766 0.6174 0.5573

---

---

**TS37**

---

## Cartesian Coordinates (Å)

|   |          |          |          |
|---|----------|----------|----------|
| N | 1.39220  | -0.28240 | -0.19087 |
| C | 0.19628  | 0.29449  | 0.31515  |
| N | -0.95502 | -0.24848 | -0.10651 |
| C | -2.01400 | -0.84889 | -0.29809 |
| C | 2.51775  | -0.41715 | 0.56934  |
| H | 0.26826  | 0.38183  | 1.39810  |
| H | 3.35786  | -0.83755 | -0.00499 |
| H | 1.43139  | -0.50857 | -1.16939 |
| H | -2.93227 | 0.66449  | -0.89591 |
| O | 2.59752  | -0.13262 | 1.73657  |
| H | -2.18773 | -1.91077 | -0.11522 |
| O | -3.12195 | -0.27796 | -0.78963 |
| O | 0.29931  | 1.78174  | -0.15776 |
| O | -0.84947 | 2.34194  | -0.29089 |

---

Vibrational wavenumbers (cm<sup>-1</sup>)

|                |        |        |        |        |        |        |        |
|----------------|--------|--------|--------|--------|--------|--------|--------|
| 217.6 <i>i</i> | 36.6   | 62.7   | 88.9   | 123.2  | 180.6  | 220.7  | 287.5  |
| 406.2          | 445.1  | 516.7  | 542.8  | 649.3  | 664.9  | 690.4  | 793.6  |
| 1010.6         | 1035.5 | 1044.4 | 1092.9 | 1207.4 | 1228.3 | 1253.4 | 1313.1 |
| 1318.1         | 1376.7 | 1432.8 | 1474.3 | 1550.8 | 1821.4 | 1983.1 | 2997.5 |
| 3101.9         | 3123.1 | 3666.9 | 3769.3 |        |        |        |        |

---

Rotational Constants (GHz):            2.9057    0.9387    0.7634

---

---

**PC29e**

---

## Cartesian Coordinates (Å)

|   |          |          |          |
|---|----------|----------|----------|
| N | 1.33356  | 0.55784  | 0.82310  |
| C | 0.12752  | 0.34372  | 1.47070  |
| N | -0.71740 | -0.56402 | 1.26581  |
| C | -0.80530 | -1.43488 | 0.21378  |
| C | 2.06065  | -0.34231 | 0.07932  |
| H | -0.06567 | 1.07087  | 2.25352  |
| H | 2.95355  | 0.12123  | -0.36483 |
| H | 1.71487  | 1.48464  | 0.90851  |
| H | -1.42825 | 0.52182  | -1.30847 |
| O | 1.78862  | -1.50461 | -0.05594 |
| H | -0.62812 | -2.48343 | 0.46809  |
| O | -1.19025 | -1.10174 | -0.88866 |
| O | -0.83850 | 2.17202  | -0.71506 |
| O | -1.53233 | 1.47523  | -1.57832 |

---

Vibrational wavenumbers (cm<sup>-1</sup>)

|        |        |        |        |        |        |        |        |
|--------|--------|--------|--------|--------|--------|--------|--------|
| 29.9   | 39.2   | 86.3   | 93.9   | 127.4  | 166.4  | 223.0  | 236.1  |
| 271.3  | 319.6  | 402.6  | 565.1  | 589.3  | 725.9  | 749.7  | 900.0  |
| 981.7  | 998.3  | 1040.0 | 1049.4 | 1088.7 | 1247.3 | 1285.6 | 1406.4 |
| 1436.8 | 1473.4 | 1541.9 | 1606.8 | 1740.9 | 1783.6 | 1858.8 | 3015.4 |
| 3087.5 | 3160.7 | 3227.8 | 3658.6 |        |        |        |        |

---

Rotational Constants (GHz):            2.0269    1.2402    1.0581

---

| PC29z                                       |          |          |          |        |        |        |        |
|---------------------------------------------|----------|----------|----------|--------|--------|--------|--------|
| Cartesian Coordinates (Å)                   |          |          |          |        |        |        |        |
| N                                           | 1.63064  | -0.68632 | -0.13561 |        |        |        |        |
| C                                           | 0.31368  | -0.72950 | 0.16219  |        |        |        |        |
| N                                           | -0.38981 | -1.76745 | -0.09745 |        |        |        |        |
| C                                           | -1.74733 | -1.68152 | 0.11286  |        |        |        |        |
| C                                           | 2.44600  | 0.40284  | 0.14426  |        |        |        |        |
| H                                           | -0.08225 | 0.17221  | 0.63468  |        |        |        |        |
| H                                           | 1.90513  | 1.22910  | 0.62831  |        |        |        |        |
| H                                           | 2.05192  | -1.48164 | -0.59591 |        |        |        |        |
| H                                           | -2.18918 | 0.97778  | -0.28194 |        |        |        |        |
| O                                           | 3.61063  | 0.42350  | -0.12566 |        |        |        |        |
| H                                           | -2.20647 | -2.64252 | 0.37055  |        |        |        |        |
| O                                           | -2.43889 | -0.68978 | -0.01172 |        |        |        |        |
| O                                           | -0.92341 | 2.18474  | 0.29695  |        |        |        |        |
| O                                           | -2.02822 | 1.95285  | -0.36459 |        |        |        |        |
| Vibrational wavenumbers (cm <sup>-1</sup> ) |          |          |          |        |        |        |        |
| 39.6                                        | 49.0     | 72.3     | 113.1    | 129.9  | 168.7  | 179.2  | 248.2  |
| 262.4                                       | 327.1    | 348.7    | 481.9    | 614.0  | 688.3  | 760.6  | 805.4  |
| 1044.6                                      | 1064.1   | 1081.2   | 1129.1   | 1224.8 | 1284.1 | 1332.0 | 1363.0 |
| 1423.8                                      | 1447.8   | 1505.1   | 1597.4   | 1680.7 | 1765.0 | 1857.1 | 3025.1 |
| 3063.2                                      | 3095.9   | 3317.0   | 3602.3   |        |        |        |        |
| Rotational Constants (GHz):                 |          |          |          | 1.9557 | 0.9089 | 0.6302 |        |

| PC30e                                       |          |          |          |        |        |        |        |
|---------------------------------------------|----------|----------|----------|--------|--------|--------|--------|
| Cartesian Coordinates (Å)                   |          |          |          |        |        |        |        |
| N                                           | 0.76235  | -0.16927 | -0.32743 |        |        |        |        |
| C                                           | 0.37748  | -0.46172 | 0.88171  |        |        |        |        |
| N                                           | -0.71785 | -1.20304 | 1.18783  |        |        |        |        |
| C                                           | -1.35746 | -1.81373 | 0.24297  |        |        |        |        |
| C                                           | 1.99262  | 0.50999  | -0.45028 |        |        |        |        |
| H                                           | 0.94613  | -0.09785 | 1.73408  |        |        |        |        |
| H                                           | 2.05989  | 1.08819  | -1.38275 |        |        |        |        |
| H                                           | -0.59051 | 1.06796  | -0.96774 |        |        |        |        |
| H                                           | -0.30008 | -1.24445 | -1.17502 |        |        |        |        |
| O                                           | 2.89262  | 0.45271  | 0.33776  |        |        |        |        |
| H                                           | -2.22534 | -2.41033 | 0.50415  |        |        |        |        |
| O                                           | -1.08925 | -1.82851 | -1.03214 |        |        |        |        |
| O                                           | -1.30954 | 2.10362  | 0.35312  |        |        |        |        |
| O                                           | -1.25648 | 1.79114  | -0.91780 |        |        |        |        |
| Vibrational wavenumbers (cm <sup>-1</sup> ) |          |          |          |        |        |        |        |
| 34.4                                        | 49.4     | 60.8     | 74.4     | 118.5  | 167.9  | 192.0  | 220.4  |
| 237.7                                       | 319.6    | 470.1    | 523.0    | 599.8  | 760.5  | 863.4  | 954.1  |
| 1032.9                                      | 1058.5   | 1082.3   | 1107.6   | 1159.6 | 1252.9 | 1305.9 | 1382.1 |
| 1409.1                                      | 1432.2   | 1460.4   | 1525.1   | 1577.5 | 1675.1 | 1820.6 | 3019.7 |
| 3155.8                                      | 3182.5   | 3240.7   | 3425.1   |        |        |        |        |
| Rotational Constants (GHz):                 |          |          |          | 1.6023 | 1.2961 | 0.9015 |        |



| PC30z                                       |          |          |          |        |        |        |        |
|---------------------------------------------|----------|----------|----------|--------|--------|--------|--------|
| Cartesian Coordinates (Å)                   |          |          |          |        |        |        |        |
| N                                           | 0.44696  | -0.98292 | 0.84881  |        |        |        |        |
| C                                           | -0.53766 | -0.27581 | 1.26142  |        |        |        |        |
| N                                           | -1.77656 | -0.22166 | 0.69958  |        |        |        |        |
| C                                           | -2.07193 | 0.49058  | -0.30858 |        |        |        |        |
| C                                           | 0.27525  | -1.84759 | -0.23871 |        |        |        |        |
| H                                           | -0.39702 | 0.31443  | 2.16551  |        |        |        |        |
| H                                           | -0.53123 | -2.58826 | -0.10386 |        |        |        |        |
| H                                           | 1.78497  | 0.15971  | 0.51707  |        |        |        |        |
| H                                           | -0.38067 | 1.36193  | -0.63322 |        |        |        |        |
| O                                           | 0.98832  | -1.83283 | -1.20155 |        |        |        |        |
| H                                           | -3.07935 | 0.45452  | -0.70710 |        |        |        |        |
| O                                           | -1.30127 | 1.32102  | -0.97532 |        |        |        |        |
| O                                           | 1.30903  | 1.81188  | -0.14971 |        |        |        |        |
| O                                           | 2.24349  | 1.01577  | 0.28134  |        |        |        |        |
| Vibrational wavenumbers (cm <sup>-1</sup> ) |          |          |          |        |        |        |        |
| 39.7                                        | 68.1     | 90.0     | 103.2    | 146.8  | 154.0  | 208.3  | 235.9  |
| 287.8                                       | 371.6    | 427.8    | 622.5    | 719.9  | 747.0  | 766.8  | 842.9  |
| 1015.7                                      | 1023.1   | 1046.6   | 1070.2   | 1118.4 | 1266.2 | 1304.8 | 1393.8 |
| 1404.4                                      | 1437.2   | 1466.3   | 1578.9   | 1673.7 | 1750.8 | 1832.9 | 2975.2 |
| 3130.4                                      | 3154.5   | 3197.2   | 3437.7   |        |        |        |        |
| Rotational Constants (GHz):                 |          |          |          | 1.6720 | 1.4418 | 1.0411 |        |

| PC31                                        |          |          |          |        |        |        |        |
|---------------------------------------------|----------|----------|----------|--------|--------|--------|--------|
| Cartesian Coordinates (Å)                   |          |          |          |        |        |        |        |
| N                                           | -1.67441 | -0.39104 | 0.00001  |        |        |        |        |
| C                                           | -1.46858 | 0.94786  | 0.00006  |        |        |        |        |
| N                                           | -0.33712 | 1.56981  | 0.00003  |        |        |        |        |
| C                                           | 0.84259  | 0.86404  | -0.00008 |        |        |        |        |
| C                                           | -2.94911 | -0.95532 | -0.00002 |        |        |        |        |
| H                                           | -2.38234 | 1.53308  | 0.00018  |        |        |        |        |
| H                                           | -2.91316 | -2.05362 | 0.00001  |        |        |        |        |
| H                                           | -0.84791 | -0.97767 | 0.00005  |        |        |        |        |
| H                                           | 2.61801  | -0.94071 | -0.00003 |        |        |        |        |
| O                                           | -3.96397 | -0.32294 | -0.00006 |        |        |        |        |
| H                                           | 1.73379  | 1.49751  | -0.00032 |        |        |        |        |
| O                                           | 0.96788  | -0.35730 | 0.00009  |        |        |        |        |
| O                                           | 4.06271  | 0.17583  | -0.00001 |        |        |        |        |
| O                                           | 3.59875  | -1.05178 | -0.00001 |        |        |        |        |
| Vibrational wavenumbers (cm <sup>-1</sup> ) |          |          |          |        |        |        |        |
| 20.5                                        | 54.9     | 59.0     | 103.4    | 110.8  | 111.4  | 209.9  | 222.0  |
| 260.4                                       | 293.1    | 456.6    | 500.2    | 649.4  | 780.1  | 828.9  | 860.6  |
| 1038.0                                      | 1045.8   | 1067.9   | 1109.9   | 1112.2 | 1263.7 | 1272.9 | 1389.6 |
| 1438.4                                      | 1441.2   | 1484.6   | 1584.9   | 1642.7 | 1713.3 | 1854.6 | 3027.8 |
| 3099.6                                      | 3186.8   | 3387.4   | 3536.9   |        |        |        |        |
| Rotational Constants (GHz):                 |          |          |          | 5.0561 | 0.5365 | 0.4850 |        |

---

**PC32**

---

## Cartesian Coordinates (Å)

|   |          |          |          |
|---|----------|----------|----------|
| N | 1.03790  | -0.00300 | -0.12197 |
| C | 0.57250  | -1.17547 | 0.12413  |
| N | -0.71354 | -1.54798 | -0.09977 |
| C | -1.69485 | -0.80322 | 0.21253  |
| C | 2.42516  | 0.16376  | 0.06773  |
| H | 1.23012  | -1.96413 | 0.48714  |
| H | 2.68908  | 1.20974  | 0.27837  |
| H | 0.15133  | 1.46148  | -0.44550 |
| H | -2.91889 | -1.91725 | -0.64923 |
| O | 3.24923  | -0.70331 | -0.01666 |
| H | -1.62410 | 0.12054  | 0.78644  |
| O | -2.93024 | -1.10717 | -0.12397 |
| O | -1.18651 | 2.32883  | 0.48452  |
| O | -0.33435 | 2.33615  | -0.51032 |

Vibrational wavenumbers (cm<sup>-1</sup>)

|        |        |        |        |        |        |        |        |
|--------|--------|--------|--------|--------|--------|--------|--------|
| 55.0   | 57.3   | 81.0   | 93.2   | 127.5  | 140.7  | 199.1  | 229.0  |
| 239.6  | 316.9  | 364.3  | 494.7  | 680.0  | 680.8  | 822.6  | 832.1  |
| 1036.2 | 1065.4 | 1075.1 | 1094.1 | 1152.5 | 1277.2 | 1291.7 | 1381.5 |
| 1396.4 | 1430.0 | 1449.2 | 1618.9 | 1636.4 | 1733.9 | 1818.3 | 3022.3 |
| 3081.9 | 3133.5 | 3137.0 | 3798.4 |        |        |        |        |

---

Rotational Constants (GHz): 1.7944 1.0254 0.6714

---

---

**PC33**

---

## Cartesian Coordinates (Å)

|   |          |          |          |
|---|----------|----------|----------|
| N | 2.45309  | 0.36834  | -0.07789 |
| C | 1.13457  | 0.08967  | 0.05529  |
| N | 0.24211  | 0.97213  | -0.17419 |
| C | -1.07399 | 0.55105  | -0.12327 |
| C | 3.46852  | -0.52943 | 0.21026  |
| H | 0.90203  | -0.92419 | 0.38480  |
| H | 3.09285  | -1.50289 | 0.56117  |
| H | 2.71871  | 1.28851  | -0.40129 |
| H | -3.16132 | -0.83505 | -0.26035 |
| O | 4.62780  | -0.26532 | 0.08628  |
| H | -1.78217 | 1.32809  | 0.18067  |
| O | -1.45373 | -0.56388 | -0.42444 |
| O | -4.27205 | 0.42371  | 0.45922  |
| O | -4.12843 | -0.77020 | -0.06532 |

Vibrational wavenumbers (cm<sup>-1</sup>)

|        |        |        |        |        |        |        |        |
|--------|--------|--------|--------|--------|--------|--------|--------|
| 19.8   | 49.7   | 62.9   | 92.6   | 106.7  | 138.5  | 186.9  | 217.2  |
| 278.1  | 317.0  | 357.5  | 485.6  | 618.0  | 672.3  | 755.5  | 808.3  |
| 1033.7 | 1051.0 | 1085.9 | 1122.3 | 1230.0 | 1266.5 | 1320.2 | 1348.6 |
| 1418.4 | 1433.8 | 1503.3 | 1588.2 | 1686.0 | 1762.1 | 1859.4 | 3007.3 |
| 3086.7 | 3110.5 | 3359.5 | 3604.0 |        |        |        |        |

---

Rotational Constants (GHz): 8.9413 0.4078 0.3952

---

| PC34e                                       |          |          |          |        |        |        |        |
|---------------------------------------------|----------|----------|----------|--------|--------|--------|--------|
| Cartesian Coordinates (Å)                   |          |          |          |        |        |        |        |
| N                                           | 1.00144  | -0.20916 | -0.18635 |        |        |        |        |
| C                                           | 0.33325  | -1.26874 | 0.10118  |        |        |        |        |
| N                                           | -1.00958 | -1.38985 | -0.05667 |        |        |        |        |
| C                                           | -1.81440 | -0.46854 | 0.28774  |        |        |        |        |
| C                                           | 2.40256  | -0.30973 | -0.06385 |        |        |        |        |
| H                                           | 0.84505  | -2.16579 | 0.44700  |        |        |        |        |
| H                                           | 2.87132  | 0.66799  | 0.11628  |        |        |        |        |
| H                                           | 0.39619  | 1.39547  | -0.49332 |        |        |        |        |
| H                                           | -3.26889 | -1.33458 | -0.49736 |        |        |        |        |
| O                                           | 3.04080  | -1.31926 | -0.17122 |        |        |        |        |
| H                                           | -1.54091 | 0.42918  | 0.84184  |        |        |        |        |
| O                                           | -3.09995 | -0.53310 | 0.01385  |        |        |        |        |
| O                                           | -0.70449 | 2.50996  | 0.48310  |        |        |        |        |
| O                                           | 0.08386  | 2.34644  | -0.55020 |        |        |        |        |
| Vibrational wavenumbers (cm <sup>-1</sup> ) |          |          |          |        |        |        |        |
| 54.9                                        | 57.2     | 80.9     | 93.7     | 128.2  | 141.2  | 199.4  | 228.9  |
| 239.7                                       | 316.8    | 364.2    | 494.7    | 680.1  | 680.7  | 822.3  | 832.1  |
| 1036.2                                      | 1065.4   | 1075.0   | 1094.0   | 1152.4 | 1277.2 | 1292.1 | 1381.4 |
| 1396.2                                      | 1430.1   | 1449.7   | 1619.3   | 1636.5 | 1733.9 | 1818.3 | 3022.3 |
| 3082.1                                      | 3133.6   | 3137.0   | 3798.4   |        |        |        |        |
| Rotational Constants (GHz):                 |          |          |          | 1.7944 | 1.0254 | 0.6714 |        |

| PC34z                                       |          |          |          |        |        |        |        |
|---------------------------------------------|----------|----------|----------|--------|--------|--------|--------|
| Cartesian Coordinates (Å)                   |          |          |          |        |        |        |        |
| N                                           | -0.73060 | 0.52214  | 0.23677  |        |        |        |        |
| C                                           | 0.22523  | -0.31054 | 0.17607  |        |        |        |        |
| N                                           | 1.55734  | 0.06129  | 0.10722  |        |        |        |        |
| C                                           | 2.39308  | -0.87930 | -0.07875 |        |        |        |        |
| C                                           | -0.47066 | 1.90430  | 0.31273  |        |        |        |        |
| H                                           | -0.03646 | -1.36986 | 0.16608  |        |        |        |        |
| H                                           | 0.14220  | 2.20219  | 1.17894  |        |        |        |        |
| H                                           | -2.35643 | -0.22501 | 0.01531  |        |        |        |        |
| H                                           | 3.84829  | 0.28140  | -0.04376 |        |        |        |        |
| O                                           | -0.94043 | 2.69379  | -0.45119 |        |        |        |        |
| H                                           | 2.14167  | -1.93262 | -0.20326 |        |        |        |        |
| O                                           | 3.68790  | -0.66554 | -0.14979 |        |        |        |        |
| O                                           | -2.46525 | -2.04957 | -0.06038 |        |        |        |        |
| O                                           | -3.08376 | -0.89453 | -0.08635 |        |        |        |        |
| Vibrational wavenumbers (cm <sup>-1</sup> ) |          |          |          |        |        |        |        |
| 38.4                                        | 44.2     | 56.8     | 59.8     | 118.6  | 140.9  | 157.6  | 215.0  |
| 237.8                                       | 313.0    | 402.6    | 548.6    | 666.2  | 690.4  | 697.6  | 738.9  |
| 997.8                                       | 1046.8   | 1053.2   | 1070.2   | 1163.1 | 1267.9 | 1271.9 | 1384.3 |
| 1391.2                                      | 1405.6   | 1456.5   | 1602.9   | 1694.3 | 1751.5 | 1844.9 | 2984.1 |
| 3106.9                                      | 3128.8   | 3251.5   | 3789.9   |        |        |        |        |
| Rotational Constants (GHz):                 |          |          |          | 1.8086 | 0.8056 | 0.5671 |        |

---

**M22**

---

## Cartesian Coordinates (Å)

|   |          |          |          |
|---|----------|----------|----------|
| N | 0.93349  | -0.35749 | -0.47453 |
| C | 0.04572  | 0.45314  | 0.30316  |
| N | -1.27456 | 0.29960  | -0.24868 |
| C | -2.13482 | -0.55417 | 0.41935  |
| C | 1.71508  | -1.33171 | 0.07926  |
| H | 0.10112  | 0.14485  | 1.34968  |
| H | 2.40070  | -1.77920 | -0.65683 |
| H | 1.07730  | -0.08648 | -1.43249 |
| H | -0.40732 | 2.54963  | -1.21164 |
| O | 1.66543  | -1.68151 | 1.22927  |
| H | -2.81986 | -1.09909 | -0.24417 |
| O | -2.19858 | -0.61151 | 1.62334  |
| O | 0.40313  | 1.80604  | 0.30602  |
| O | 0.49317  | 2.24789  | -1.04215 |

Vibrational wavenumbers (cm<sup>-1</sup>)

|        |        |        |        |        |        |        |        |
|--------|--------|--------|--------|--------|--------|--------|--------|
| 27.9   | 45.9   | 127.4  | 146.3  | 169.0  | 201.9  | 271.2  | 284.8  |
| 330.0  | 416.5  | 500.1  | 561.5  | 642.0  | 718.1  | 770.9  | 943.8  |
| 996.7  | 1036.7 | 1045.7 | 1081.1 | 1085.6 | 1182.3 | 1214.4 | 1301.3 |
| 1377.2 | 1401.9 | 1420.3 | 1429.8 | 1521.2 | 1703.7 | 1820.7 | 2999.4 |
| 3028.0 | 3096.2 | 3663.2 | 3805.4 |        |        |        |        |

---

Rotational Constants (GHz): 1.6494 1.5781 0.9327

---

---

**EE-P5**

---

## Cartesian Coordinates (Å)

|   |          |          |          |
|---|----------|----------|----------|
| N | -0.45812 | 0.24637  | 0.98403  |
| C | 0.58074  | -0.16414 | 0.37205  |
| N | 0.77082  | -0.00619 | -0.98206 |
| C | -0.22343 | -0.12498 | -1.75777 |
| C | -0.47027 | 0.13629  | 2.37532  |
| H | 1.40956  | -0.64130 | 0.89524  |
| H | -1.21345 | -0.45660 | -1.45305 |
| H | -1.45180 | -0.17707 | 2.76166  |
| O | 0.44884  | 0.40106  | 3.10380  |
| O | -0.14340 | 0.12376  | -3.05295 |
| H | 0.75031  | 0.43280  | -3.24637 |

Vibrational wavenumbers (cm<sup>-1</sup>)

|        |        |        |        |        |        |        |        |
|--------|--------|--------|--------|--------|--------|--------|--------|
| 78.5   | 126.7  | 174.6  | 184.9  | 324.7  | 361.6  | 485.6  | 669.9  |
| 687.2  | 814.2  | 1027.1 | 1040.1 | 1066.6 | 1075.4 | 1156.7 | 1273.2 |
| 1376.6 | 1399.9 | 1412.9 | 1419.8 | 1665.4 | 1740.2 | 1801.9 | 3005.8 |
| 3115.9 | 3156.8 | 3803.3 |        |        |        |        |        |

---

Rotational Constants (GHz): 16.1722 1.0964 1.0415

---

| ZZ-P5                                       |          |          |          |        |        |        |        |
|---------------------------------------------|----------|----------|----------|--------|--------|--------|--------|
| Cartesian Coordinates (Å)                   |          |          |          |        |        |        |        |
| N                                           | -1.33070 | -0.12724 | -0.83518 |        |        |        |        |
| C                                           | -1.24649 | -0.13697 | 0.43362  |        |        |        |        |
| N                                           | -0.22798 | -0.57074 | 1.24254  |        |        |        |        |
| C                                           | 0.92009  | -0.04211 | 1.37683  |        |        |        |        |
| C                                           | -0.29282 | -0.27615 | -1.70898 |        |        |        |        |
| H                                           | -2.14106 | 0.13795  | 0.98831  |        |        |        |        |
| H                                           | 1.58633  | -0.44756 | 2.13193  |        |        |        |        |
| H                                           | -0.44736 | -1.05534 | -2.46583 |        |        |        |        |
| O                                           | 0.68271  | 0.44947  | -1.75008 |        |        |        |        |
| O                                           | 1.44217  | 0.98858  | 0.74509  |        |        |        |        |
| H                                           | 1.05520  | 1.08001  | -0.15825 |        |        |        |        |
| Vibrational wavenumbers (cm <sup>-1</sup> ) |          |          |          |        |        |        |        |
| 109.6                                       | 157.5    | 218.8    | 236.0    | 363.8  | 405.6  | 652.6  | 708.5  |
| 797.8                                       | 822.8    | 1004.8   | 1015.8   | 1048.6 | 1076.4 | 1135.1 | 1272.6 |
| 1405.4                                      | 1412.9   | 1449.3   | 1479.9   | 1687.1 | 1738.1 | 1774.6 | 3045.2 |
| 3139.5                                      | 3175.0   | 3355.8   |          |        |        |        |        |
| Rotational Constants (GHz):                 |          |          |          | 4.2348 | 2.7392 | 1.8119 |        |

| TSa endo                                    |          |          |          |        |        |        |        |
|---------------------------------------------|----------|----------|----------|--------|--------|--------|--------|
| Cartesian Coordinates (Å)                   |          |          |          |        |        |        |        |
| N                                           | 1.65998  | -0.43078 | 1.18071  |        |        |        |        |
| C                                           | 1.74121  | 0.04283  | -0.13139 |        |        |        |        |
| N                                           | 2.06903  | 1.35898  | -0.12442 |        |        |        |        |
| C                                           | 1.09692  | 1.74950  | 0.80384  |        |        |        |        |
| C                                           | 1.29632  | 0.72658  | 1.98657  |        |        |        |        |
| H                                           | 1.01735  | 2.79482  | 1.07762  |        |        |        |        |
| H                                           | 0.38060  | 0.56771  | 2.55122  |        |        |        |        |
| H                                           | 1.19771  | -1.30914 | 1.35169  |        |        |        |        |
| H                                           | 3.09923  | 1.20368  | 2.42340  |        |        |        |        |
| O                                           | 2.26456  | 1.12427  | 2.89351  |        |        |        |        |
| H                                           | 2.08504  | -0.62710 | -0.90798 |        |        |        |        |
| O                                           | 0.06534  | 0.24399  | -0.49891 |        |        |        |        |
| O                                           | -0.20524 | 1.34856  | 0.22821  |        |        |        |        |
| Vibrational wavenumbers (cm <sup>-1</sup> ) |          |          |          |        |        |        |        |
| 1586.0 <i>i</i>                             | 169.5    | 300.9    | 327.6    | 353.4  | 424.8  | 511.7  | 536.9  |
| 583.9                                       | 630.5    | 774.0    | 790.5    | 869.3  | 913.5  | 928.7  | 986.4  |
| 1059.4                                      | 1131.0   | 1142.2   | 1161.0   | 1207.6 | 1225.2 | 1257.8 | 1280.4 |
| 1307.7                                      | 1399.0   | 1428.1   | 1451.5   | 3132.0 | 3189.5 | 3216.0 | 3634.3 |
| 3852.9                                      |          |          |          |        |        |        |        |
| Rotational Constants (GHz):                 |          |          |          | 4.1581 | 2.1193 | 1.9332 |        |

| TSs endo                                    |          |          |          |        |        |        |        |
|---------------------------------------------|----------|----------|----------|--------|--------|--------|--------|
| Cartesian Coordinates (Å)                   |          |          |          |        |        |        |        |
| N                                           | 2.47575  | -1.66100 | 0.55641  |        |        |        |        |
| C                                           | 2.25636  | -1.36346 | -0.76810 |        |        |        |        |
| N                                           | 0.99539  | -0.92311 | -0.94735 |        |        |        |        |
| C                                           | 0.97487  | 0.00495  | 0.10739  |        |        |        |        |
| C                                           | 1.55794  | -0.82301 | 1.32623  |        |        |        |        |
| H                                           | 2.80102  | -1.89144 | -1.53835 |        |        |        |        |
| H                                           | 0.05855  | 0.55304  | 0.29319  |        |        |        |        |
| H                                           | 0.77145  | -1.40903 | 1.79649  |        |        |        |        |
| H                                           | 3.40232  | -1.83025 | 0.91322  |        |        |        |        |
| H                                           | 2.70146  | 0.59844  | 1.89156  |        |        |        |        |
| O                                           | 2.17558  | -0.08961 | 2.31425  |        |        |        |        |
| O                                           | 2.01829  | 0.98241  | -0.16981 |        |        |        |        |
| O                                           | 3.01873  | 0.29186  | -0.79690 |        |        |        |        |
| Vibrational wavenumbers (cm <sup>-1</sup> ) |          |          |          |        |        |        |        |
| 1459.9 <i>i</i>                             | 171.3    | 280.9    | 311.5    | 405.6  | 466.0  | 500.7  | 525.0  |
| 613.2                                       | 628.4    | 672.7    | 772.5    | 852.5  | 889.6  | 931.2  | 1021.7 |
| 1065.1                                      | 1104.9   | 1130.1   | 1169.8   | 1211.4 | 1234.9 | 1262.9 | 1308.1 |
| 1322.1                                      | 1408.5   | 1430.7   | 1449.2   | 3122.4 | 3185.5 | 3224.1 | 3640.6 |
| 3809.7                                      |          |          |          |        |        |        |        |
| Rotational Constants (GHz):                 |          |          |          | 3.4409 | 2.4831 | 2.1611 |        |
| BPRa                                        |          |          |          |        |        |        |        |
| Cartesian Coordinates (Å)                   |          |          |          |        |        |        |        |
| N                                           | 0.29760  | -1.06603 | 0.27929  |        |        |        |        |
| C                                           | 0.33230  | -0.70871 | -1.10759 |        |        |        |        |
| N                                           | 0.83324  | 0.65434  | -1.01911 |        |        |        |        |
| C                                           | -0.30782 | 1.06937  | -0.24893 |        |        |        |        |
| C                                           | -0.18194 | 0.12290  | 0.98135  |        |        |        |        |
| H                                           | -0.40156 | 2.13107  | -0.04999 |        |        |        |        |
| H                                           | -1.15904 | -0.01093 | 1.44338  |        |        |        |        |
| H                                           | -0.15093 | -1.94116 | 0.49848  |        |        |        |        |
| H                                           | 1.57683  | 0.48397  | 1.65852  |        |        |        |        |
| O                                           | 0.67628  | 0.56381  | 1.98251  |        |        |        |        |
| H                                           | 0.88767  | -1.38463 | -1.74912 |        |        |        |        |
| O                                           | -0.95572 | -0.54873 | -1.67831 |        |        |        |        |
| O                                           | -1.44712 | 0.63462  | -0.99039 |        |        |        |        |
| Vibrational wavenumbers (cm <sup>-1</sup> ) |          |          |          |        |        |        |        |
| 153.8                                       | 275.9    | 307.6    | 391.5    | 440.1  | 511.1  | 549.5  | 596.6  |
| 765.6                                       | 814.9    | 853.8    | 897.7    | 904.8  | 942.8  | 984.0  | 998.1  |
| 1043.7                                      | 1112.7   | 1115.8   | 1145.3   | 1217.3 | 1245.3 | 1274.2 | 1295.7 |
| 1327.0                                      | 1364.6   | 1427.1   | 1445.1   | 3111.0 | 3177.8 | 3182.6 | 3628.1 |
| 3865.3                                      |          |          |          |        |        |        |        |
| Rotational Constants (GHz):                 |          |          |          | 4.3319 | 2.1229 | 1.9034 |        |

| <b>BPRs</b>                                 |          |          |          |        |        |        |        |
|---------------------------------------------|----------|----------|----------|--------|--------|--------|--------|
| Cartesian Coordinates (Å)                   |          |          |          |        |        |        |        |
| N                                           | 0.49759  | -1.11138 | 0.15469  |        |        |        |        |
| C                                           | 0.47784  | -0.57684 | -1.16345 |        |        |        |        |
| N                                           | -0.95001 | -0.34926 | -1.30882 |        |        |        |        |
| C                                           | -0.96337 | 0.59300  | -0.23550 |        |        |        |        |
| C                                           | -0.40130 | -0.26698 | 0.94616  |        |        |        |        |
| H                                           | 0.95275  | -1.18347 | -1.92721 |        |        |        |        |
| H                                           | -1.88550 | 1.13797  | -0.06724 |        |        |        |        |
| H                                           | -1.16906 | -0.85173 | 1.44733  |        |        |        |        |
| H                                           | 1.38601  | -1.34448 | 0.56977  |        |        |        |        |
| H                                           | 0.72316  | 1.18582  | 1.46898  |        |        |        |        |
| O                                           | 0.22254  | 0.49488  | 1.91904  |        |        |        |        |
| O                                           | 0.06664  | 1.53995  | -0.54266 |        |        |        |        |
| O                                           | 1.04259  | 0.73259  | -1.26109 |        |        |        |        |
| Vibrational wavenumbers (cm <sup>-1</sup> ) |          |          |          |        |        |        |        |
| 150.8                                       | 309.9    | 393.7    | 429.6    | 510.2  | 530.6  | 559.2  | 628.4  |
| 682.9                                       | 794.2    | 861.4    | 873.7    | 906.9  | 917.6  | 981.5  | 1031.2 |
| 1041.7                                      | 1101.4   | 1132.2   | 1152.4   | 1219.1 | 1237.8 | 1289.0 | 1310.3 |
| 1326.1                                      | 1361.4   | 1414.6   | 1462.0   | 3123.1 | 3177.4 | 3182.2 | 3627.0 |
| 3795.5                                      |          |          |          |        |        |        |        |
| Rotational Constants (GHz):                 |          |          |          | 3.6141 | 2.4667 | 2.2090 |        |

| <b>TS FMF N-inversion</b>                   |          |          |          |         |        |        |        |
|---------------------------------------------|----------|----------|----------|---------|--------|--------|--------|
| Cartesian Coordinates (Å)                   |          |          |          |         |        |        |        |
| N                                           | 0.72705  | 0.15162  | -0.73951 |         |        |        |        |
| C                                           | -0.49043 | -0.17369 | -0.16049 |         |        |        |        |
| N                                           | -0.72156 | -0.04314 | 1.04886  |         |        |        |        |
| C                                           | -0.91152 | 0.00533  | 2.37036  |         |        |        |        |
| C                                           | 0.97390  | 0.04528  | -2.09201 |         |        |        |        |
| H                                           | -1.21957 | -0.54467 | -0.87895 |         |        |        |        |
| H                                           | -1.34441 | 0.96765  | 2.68603  |         |        |        |        |
| H                                           | 2.00658  | 0.32681  | -2.34808 |         |        |        |        |
| H                                           | 1.46746  | 0.45847  | -0.12983 |         |        |        |        |
| O                                           | 0.16550  | -0.30999 | -2.90449 |         |        |        |        |
| O                                           | -0.65308 | -0.88366 | 3.14802  |         |        |        |        |
| Vibrational wavenumbers (cm <sup>-1</sup> ) |          |          |          |         |        |        |        |
| 217.6 <i>i</i>                              | 59.6     | 127.5    | 200.5    | 223.9   | 359.1  | 415.0  | 634.1  |
| 671.3                                       | 801.3    | 1005.2   | 1016.2   | 1042.8  | 1070.5 | 1095.5 | 1224.1 |
| 1391.6                                      | 1415.5   | 1439.7   | 1539.0   | 1754.7  | 1834.2 | 1970.7 | 2988.0 |
| 3005.6                                      | 3135.4   | 3644.8   |          |         |        |        |        |
| Rotational Constants (GHz):                 |          |          |          | 14.5916 | 1.0251 | 0.9980 |        |

---

**TS direct H-abstraction**

---

## Cartesian Coordinates (Å)

|   |          |          |          |
|---|----------|----------|----------|
| N | 0.15043  | -1.98036 | -0.92115 |
| C | 0.93100  | -1.21646 | -0.16734 |
| C | 0.22814  | -0.03860 | 0.33920  |
| N | -1.11589 | -0.36202 | -0.06638 |
| C | -1.06717 | -1.44144 | -0.84930 |
| H | 1.98523  | -1.40441 | -0.04237 |
| H | 0.56486  | 0.86638  | -0.33483 |
| H | -1.92984 | -1.82973 | -1.36631 |
| H | -1.90798 | 0.23959  | 0.06902  |
| O | 0.40299  | 0.39337  | 1.63396  |
| H | 0.45769  | 1.36233  | 1.62171  |
| O | 0.75430  | 2.44006  | -0.51742 |
| O | 0.54633  | 2.97120  | 0.60121  |

---

Vibrational wavenumbers (cm<sup>-1</sup>)

|                |        |        |        |        |        |        |        |
|----------------|--------|--------|--------|--------|--------|--------|--------|
| 505.6 <i>i</i> | 38.9   | 111.1  | 136.7  | 266.5  | 290.4  | 355.8  | 512.7  |
| 590.0          | 613.8  | 624.5  | 708.0  | 749.3  | 864.4  | 896.6  | 901.1  |
| 972.6          | 1115.2 | 1152.2 | 1185.9 | 1259.4 | 1262.5 | 1310.3 | 1360.9 |
| 1392.1         | 1436.6 | 1501.4 | 1540.3 | 1925.2 | 3253.4 | 3259.9 | 3624.8 |
| 3692.0         |        |        |        |        |        |        |        |

---

## Rotational Constants (GHz):

|        |        |        |
|--------|--------|--------|
| 4.2413 | 1.1984 | 1.1568 |
|--------|--------|--------|

---



## Notes and references

- [1] J. Zádor, C. Martí, R. Van de Vijver, S. L. Johansen, Y. Yang, H. A. Michelsen and H. N. Najm, *J. Phys. Chem. A*, 2023, **127**, 565–588.
- [2] D. R. Glowacki, C.-H. Liang, C. Morley, M. J. Pilling and S. H. Robertson, *The Journal of Physical Chemistry A*, 2012, **116**, 9545–9560.
- [3] J.-D. Chai and M. Head-Gordon, *Physical Chemistry Chemical Physics*, 2008, **10**, 6615–6620.
- [4] T. H. Dunning Jr, *The Journal of chemical physics*, 1989, **90**, 1007–1023.
- [5] R. A. Kendall, T. H. Dunning Jr and R. J. Harrison, *The Journal of chemical physics*, 1992, **96**, 6796–6806.
- [6] G. Knizia, T. B. Adler and H.-J. Werner, *The Journal of chemical physics*, 2009, **130**, 054104.
- [7] K. A. Peterson, T. B. Adler and H.-J. Werner, *The Journal of chemical physics*, 2008, **128**, 084102.
- [8] C. Hättig and F. Weigend, *The Journal of Chemical Physics*, 2000, **113**, 5154–5161.
- [9] F. Weigend and R. Ahlrichs, *Physical Chemistry Chemical Physics*, 2005, **7**, 3297–3305.
- [10] *TURBOMOLE V7.8 2023, a development of University of Karlsruhe and Forschungszentrum Karlsruhe GmbH, 1989-2007, TURBOMOLE GmbH, since 2007; available from <https://www.turbomole.org>.*
- [11] S. G. Balasubramani, G. P. Chen, S. Coriani, M. Diedenhofen, M. S. Frank, Y. J. Franzke, F. Furche, R. Grotjahn, M. E. Harding, C. Hättig, A. Hellweg, B. Helmich-Paris, C. Holzer, U. Huniar, M. Kaupp, A. Marefat Khah, S. Karbalaei Khani, T. Müller, F. Mack, B. D. Nguyen, S. M. Parker, E. Perlt, D. Rappoport, K. Reiter, S. Roy, M. Rückert, G. Schmitz, M. Sierka, E. Tapavicza, D. P. Tew, C. van Wüllen, V. K. Voora, F. Weigend, A. Wodynski and J. M. Yu, *J. Chem. Phys.*, 2020, **152**, 184107.
- [12] R. R. Valiev and T. Kurten, *Royal Society Open Science*, 2020, **7**, 200521.
- [13] H.-J. Werner, P. J. Knowles *et al.*, *MOLPRO, version 2022.2*, a package of *ab initio* programs.
- [14] H.-J. Werner, P. J. Knowles, G. Knizia, F. R. Manby and M. Schütz, *Wiley Interdisciplinary Reviews: Computational Molecular Science*, 2012, **2**, 242–253.
- [15] H.-J. Werner, P. J. Knowles, F. R. Manby, J. A. Black, K. Doll, A. Heßelmann, D. Kats, A. Köhn, T. Korona, D. A. Kreplin *et al.*, *The Journal of chemical physics*, 2020, **152**, 144107.
- [16] A. Karton, E. Rabinovich, J. M. Martin and B. Ruscic, *The Journal of chemical physics*, 2006, **125**, 114108.
- [17] A. Karton, S. Daon and J. M. Martin, *Chemical Physics Letters*, 2011, **510**, 165–178.
